# Supplementary material for: Time-of-flight ICP-MS laser ablation zircon geochronology: assessment and comparison against quadrupole ICP-MS
Source: Royal Society of Chemistry journal article supplement (doi:10.1039/d0ja00252f), 2020-01-01
Supplement: d0ja00252f1.xlsx [file d0ja00252f1.xlsx]

## Sheet: TOF_Exp_1_SplitStream
Analysis	Source Filename	Comment	Preferred Age	Preferred Age	207 corr 206Pb/238U	207 corr 206Pb/238U	238U/206Pb	238U/206Pb	207Pb/206Pb	207Pb/206Pb	207Pb/235U(calc)	207Pb/235U(calc)	206Pb/238U	206Pb/238U	Rho	208Pb/232Th	208Pb/232Th	CommPb at 206Pb/238U Age		206Pb/238U Age (Ma)	206Pb/238U Age (Ma)	206Pb/238U Age (Ma)	207Pb/206Pb Age (Ma)	207Pb/206Pb Age (Ma)	207Pb/206Pb Age (Ma)	207Pb/235U(calc) Age (Ma)	207Pb/235U(calc) Age (Ma)	207Pb/235U(calc) Age (Ma)	208Pb/232Th Age (Ma)	208Pb/232Th Age (Ma)	208Pb/232Th Age (Ma)	Spot Size (µm)	Time (s)	SiO4	31P	49Ti	56Fe	89Y	90Zr	91Zr	93Nb	139La	140Ce	141Pr	146Nd	147Sm	153Eu	157Gd	159Tb
			Ma	2s%	Age	2s%	ratio	1s%	ratio	1s%	ratio	1s%	ratio	1s%		ratio	1s%			Age	2s%	2s_sys%	Age%	2s%	2s_sys%	Age	2s%	2_sys%	Age	2s%	2s_sys%			ppm	ppm	ppm	ppm	ppm	ppm	ppm	ppm	ppm	ppm	ppm	ppm	ppm	ppm	ppm	ppm
Calibraiton standard for Pb/U and Pb/Th
91500	T17AU22B003.csv						5.63486	0.78514	0.073983	4.33579	1.86309	3.94237	0.177495	0.778802	0.178186	0.0532446	2.20122	0.913144		1053.27	1.5576	1.8545	1040.1	16.8266	16.8349	1068.08	7.88475	7.9493	1051.51	4.40244	4.66879	34	27.389		<176	25.9305	<15.3	130.54	496636	493500	<0.151	<0.062	2.36702	<0.047	0.281279	0.225314	0.136071	2.23933	0.749572
91500	T17AU22B004.csv						5.52668	0.78514	0.0721821	4.70217	1.84736	3.94237	0.18095	0.778802	0.164694	0.0538829	2.20122	0.914736		1072.16	1.5576	1.8545	990.173	19.3145	19.3217	1062.49	7.88475	7.9493	1063.79	4.40244	4.66879	34	27.389		<180	15.044	<15.3	121.982	497328	493500	<0.184	<0.0569	2.2389	<0.0473	<0.138	0.206565	0.198934	1.50871	0.660317
91500	T17AU22B020.csv				1067.96	1.645	5.52124	0.78514	0.0790205	3.69258	1.95727	3.94237	0.181052	0.778802	0.207977	0.0526503	2.20122	0.914784		1072.72	1.5576	1.8545	1171.77	12.4741	12.4854	1100.95	7.88475	7.9493	1040.07	4.40244	4.66879	34	27.389		<193	<20.1	22.5619	132.499	501364	493500	<0.306	0.0451765	2.65898	0.0239127	0.290599	0.33119	0.194709	2.23849	0.70551
91500	T17AU22B021.csv						5.59832	0.78514	0.0700991	3.94781	1.71018	3.94237	0.178562	0.778802	0.19506	0.0564596	2.20122	0.913635		1059.11	1.5576	1.8545	930.34	17.4184	17.4264	1012.35	7.88475	7.9493	1113.29	4.40244	4.66879	34	27.389		<194	<19.9	16.7037	131.638	501439	493500	<0.301	<0.018	2.48038	<0.0181	0.260471	0.28181	0.232824	1.95689	0.737205
91500	T17AU22B043.csv				1043.22	1.64941	5.655	0.78514	0.0796459	3.70487	1.90688	3.94237	0.176836	0.778802	0.207317	0.0530373	2.20122	0.91284		1049.67	1.5576	1.8545	1187.35	12.3234	12.3347	1083.5	7.88475	7.9493	1047.52	4.40244	4.66879	34	27.389		<204	<18.0	<15.6	133.922	506854	493500	<0.192	<0.0538	2.55709	<0.04	0.290846	0.450663	0.21219	2.09413	0.713127
91500	T17AU22B044.csv				1072.04	1.71008	5.51626	0.78514	0.0767893	4.63989	1.88524	3.94237	0.181285	0.778802	0.166843	0.0532731	2.20122	0.914891		1073.99	1.5576	1.8545	1114.83	16.6132	16.6216	1075.91	7.88475	7.9493	1052.06	4.40244	4.66879	34	27.389		<200	<18.0	<15.4	134.852	507052	493500	<0.192	<0.0539	2.42884	<0.0399	0.177969	0.358912	0.236806	2.0172	0.753718
91500	T17AU22B063.csv						5.56103	0.78514	0.0733101	4.00311	1.80397	3.94237	0.179825	0.778802	0.192465	0.0543477	2.20122	0.914218		1066.02	1.5576	1.8545	1021.63	15.8606	15.8694	1046.9	7.88475	7.9493	1072.73	4.40244	4.66879	34	27.389		<176	<24.1	<15.9	135.504	510531	493500	<0.338	<0.0468	2.68402	<0.0292	0.190263	0.515946	0.230623	2.14956	0.763695
91500	T17AU22B064.csv						5.60767	0.78514	0.0740016	4.32443	1.80714	3.94237	0.178329	0.778802	0.178639	0.052926	2.20122	0.913528		1057.83	1.5576	1.8545	1040.61	16.773	16.7814	1048.05	7.88475	7.9493	1045.38	4.40244	4.66879	34	27.389		<176	<24.4	<16.0	134.463	510104	493500	<0.349	0.0775878	2.57524	<0.0286	<0.168	0.496619	0.275373	2.1534	0.710217
91500	T17AU22B085.csv				1061.13	1.6906	5.5647	0.78514	0.0782363	4.31029	1.94795	3.94237	0.179681	0.778802	0.179206	0.0547322	2.20122	0.914151		1065.23	1.5576	1.8545	1151.99	14.8536	14.8631	1097.74	7.88475	7.9493	1080.12	4.40244	4.66879	34	27.389		<181	<20.1	<16.0	132.555	510543	493500	<0.379	0.0688252	2.37087	<0.0256	<0.169	0.673983	0.177467	2.03061	0.801709
91500	T17AU22B086.csv						5.55467	0.78514	0.072239	3.88252	1.80235	3.94237	0.180005	0.778802	0.198212	0.0541014	2.20122	0.914301		1067	1.5576	1.8545	991.773	15.9181	15.9269	1046.31	7.88475	7.9493	1067.99	4.40244	4.66879	34	27.389		184.208	<19.2	18.3417	137.059	510003	493500	<0.36	<0.0363	2.62854	<0.0247	0.191474	0.563842	0.18193	2.39685	0.746034
91500	T17AU22B103.csv				1060.14	1.69038	5.57797	0.78514	0.0771643	4.37193	1.90932	3.94237	0.179278	0.778802	0.176759	0.0521757	2.20122	0.913965		1063.03	1.5576	1.8545	1124.55	15.4962	15.5052	1084.35	7.88475	7.9493	1030.93	4.40244	4.66879	34	27.388		<234	<27.0	<15.5	136.314	507069	493500	<0.102	<0.0468	2.4647	<0.0126	0.37502	0.225853	0.255136	2.38141	0.758974
91500	T17AU22B104.csv						5.58431	0.78514	0.0724579	4.49305	1.78924	3.94237	0.179081	0.778802	0.172137	0.0548965	2.20122	0.913874		1061.95	1.5576	1.8545	997.924	18.2905	18.2982	1041.55	7.88475	7.9493	1083.28	4.40244	4.66879	34	27.388		<245	<29.4	<15.5	135.184	506687	493500	<0.0862	<0.0412	2.70314	0.0459311	0.45259	0.588323	0.289798	2.07252	0.754837
Zircons treated as unknowns:
91500_A1	T17AU22B029.csv		1046.94	2.67741			5.66976	1.34338	0.0727681	4.46654	1.74076	5.9407	0.176339	1.3387	0.288019	0.0542324	3.89082	0.912611		1046.94	2.67741	2.86034	1006.6	18.0021	9.01661	1023.75	11.8814	11.9243	1070.51	7.78164	7.93537	34	27.389	50.0789	<206	<18.2	<15.3	131.593	503466	492832	<0.242	<0.0314	2.53437	<0.0236	0.264853	0.559118	0.186261	2.5278	0.767402
91500_A1	T17AU22B030.csv		1046.79	2.67948			5.67078	1.34617	0.0732012	3.89063	1.7498	5.55341	0.176311	1.33974	0.326984	0.0542343	4.4656	0.912598		1046.79	2.67948	2.86229	1018.63	15.4675	7.75183	1027.09	11.1068	11.1527	1070.55	8.9312	9.06546	34	27.389	50.0785	<206	<17.9	<15.2	133.85	503935	492820	<0.232	0.0465753	2.60606	<0.025	0.184042	0.651503	0.213178	1.97109	0.802893
91500_A1	T17AU22B031.csv		1058.17	2.66543			5.6048	1.33741	0.0694241	4.30384	1.67831	5.77538	0.17839	1.33271	0.29675	0.0534795	4.01905	0.913556		1058.17	2.66543	2.84913	910.449	19.4642	9.74647	1000.34	11.5508	11.5949	1056.03	8.03809	8.18701	34	27.389	50.0774	<207	<17.7	<15.3	129.81	504113	492788	<0.226	<0.0356	2.4475	0.0281693	0.349795	0.42261	0.239444	2.14946	0.759416
91500_A1	T17AU22B032.csv		1059.68	2.85787			5.59622	1.4098	0.0735866	3.71829	1.78099	5.44649	0.178667	1.42894	0.354526	0.0526622	4.0965	0.913684		1059.68	2.85787	3.02993	1029.25	14.6062	7.32225	1038.54	10.893	10.9398	1040.3	8.19301	8.33916	34	27.389	50.0742	<213	<18.0	<15.7	138.159	504179	492685	<0.225	0.0391665	2.74099	0.0316582	0.45655	0.660146	0.246884	2.20226	0.8418
91500_A1	T17AU22B033.csv		1069.45	2.61499			5.5409	1.31228	0.0776103	3.56968	1.89653	5.34883	0.180454	1.3075	0.345042	0.0544531	4.07513	0.914508		1069.45	2.61499	2.80201	1136.03	12.5036	6.27417	1079.87	10.6977	10.7453	1074.75	8.15026	8.29716	34	27.389	50.073	<215	<18.0	<15.8	138.935	504562	492653	<0.22	<0.0408	2.61209	<0.0303	0.217201	0.614682	0.307297	2.24163	0.833382
91500_A1	T17AU22B034.csv		1057.19	2.62595			5.61074	1.31774	0.0791898	3.76898	1.91056	5.58453	0.17821	1.31298	0.330038	0.0525417	3.83098	0.913473		1057.19	2.62595	2.81224	1176	12.6786	6.36132	1084.78	11.1691	11.2147	1037.98	7.66197	7.81805	34	27.389	50.079	<207	<17.2	21.6674	139.052	505034	492783	<0.207	<0.0411	2.74206	<0.0305	<0.106	0.495398	0.22294	2.26392	0.790335
91500_A1	T17AU22B035.csv		1054.56	2.62401			5.62599	1.31678	0.0695	3.77894	1.67191	5.48958	0.17773	1.31201	0.329047	0.0543253	3.98477	0.913252		1054.56	2.62401	2.81043	912.699	17.0423	8.53754	997.913	10.9792	11.0256	1072.3	7.96954	8.11971	34	27.389	50.076	<214	17.7889	<15.8	142.353	505238	492689	<0.209	<0.0444	2.66313	0.0470918	0.325364	0.458104	0.222969	2.02056	0.774048
91500_A4	T17AU22B047.csv		1061.91	2.63121			5.58446	1.32036	0.0674466	4.59747	1.63734	6.05534	0.179075	1.31561	0.276035	0.0525794	4.25509	0.913872		1061.91	2.63121	2.81715	850.667	22.4631	11.244	984.687	12.1107	12.1528	1038.7	8.51019	8.65098	34	27.389	50.081	<190	<18.3	<15.1	136.795	507024	492892	<0.198	0.0704806	2.46867	<0.0392	0.272066	0.357238	0.17521	2.06905	0.751799
91500_A4	T17AU22B048.csv		1060.01	2.68565			5.59535	1.38383	0.0725821	4.54285	1.75939	5.88182	0.178727	1.34282	0.291397	0.0577577	4.06331	0.913711		1060.01	2.68565	2.86806	1001.4	18.4193	9.22483	1030.62	11.7636	11.807	1138.18	8.12662	8.27394	34	27.389	50.0885	<189	<18.7	25.4575	137.302	507456	493058	<0.203	<0.054	2.45211	<0.039	0.259491	0.530727	0.212255	2.08389	0.836114
91500_A4	T17AU22B049.csv		1068.68	2.69242			5.54618	1.37531	0.074196	4.17946	1.81526	5.73658	0.180312	1.34621	0.312576	0.0557165	4.47992	0.914442		1068.68	2.69242	2.8744	1045.9	16.1159	8.07529	1050.98	11.4732	11.5176	1099.03	8.95984	9.09368	34	27.389	50.0885	<186	<18.9	21.6264	133.745	507544	493070	<0.208	0.058448	2.75917	0.0404883	0.335156	<0.186	0.15291	2.65623	0.74548
91500_A4	T17AU22B050.csv		1077.04	2.75988			5.49943	1.38447	0.0740251	4.5597	1.82734	5.9321	0.181845	1.37994	0.290535	0.0565506	3.99216	0.91515		1077.04	2.75988	2.93768	1041.25	17.673	8.85232	1055.33	11.8642	11.9072	1115.03	7.98431	8.13421	34	27.389	50.0819	<189	<19.6	25.3887	137.426	507994	492848	<0.218	<0.0547	2.23442	<0.0389	0.262022	0.599502	0.238197	2.13512	0.77269
91500_A5	T17AU22B022.csv	avoided slight discordance at end	1046.56	2.72874			5.67314	1.36895	0.07104	4.42516	1.70799	5.92834	0.176269	1.36437	0.295538	0.050552	4.0876	0.912579		1046.56	2.72874	2.90845	957.654	18.8878	9.45872	1011.53	11.8567	11.8997	999.623	8.17521	8.32167	34	25.968	50.0799	<197	<19.8	24.3147	134.48	501400	492798	<0.296	0.0234702	2.52776	0.0271081	0.277365	0.257949	0.225842	2.21571	0.736096
91500_A5	T17AU22B023.csv		1079.92	2.70179			5.48154	1.38234	0.0705301	4.55205	1.75336	6.04915	0.182372	1.35089	0.290571	0.0551374	4.11785	0.915393		1079.92	2.70179	2.88317	942.911	19.7781	9.90322	1028.4	12.0983	12.1405	1087.9	8.23571	8.38111	34	27.389	50.0796	<191	<18.8	16.4638	136.367	501548	492806	<0.277	<0.0197	2.57078	0.0512824	0.26386	0.493789	0.180571	2.67559	0.760842
91500_A5	T17AU22B024.csv		1066.94	2.70535			5.55409	1.36277	0.0751475	3.89775	1.84183	5.6108	0.179994	1.35267	0.330039	0.0561826	4.21621	0.914295		1066.94	2.70535	2.88651	1071.55	14.6135	7.32586	1060.52	11.2216	11.267	1107.97	8.43243	8.57449	34	27.389	50.0797	<197	<19.1	<14.9	135.094	501661	492848	<0.276	0.0298714	2.40912	<0.0185	0.205696	0.548	0.233936	2.04698	0.739685
91500_A5	T17AU22B025.csv		1056.43	2.68024			5.61411	1.38019	0.0743334	3.79474	1.80082	5.49502	0.178072	1.34012	0.341805	0.0564647	4.03738	0.91341		1056.43	2.68024	2.86299	1049.63	14.5722	7.30529	1045.76	10.99	11.0364	1113.39	8.07476	8.22301	34	27.389	50.0808	<197	<18.7	20.5969	135.388	502341	492835	<0.267	<0.0233	2.49016	<0.019	0.373473	0.348836	0.199643	2.15961	0.752707
91500_A5	T17AU22B026.csv		1068.18	2.7173	1064.32	2.71861	5.54964	1.38246	0.0781352	4.05421	1.91153	5.73138	0.180221	1.35865	0.322746	0.056132	4.28307	0.914401		1068.18	2.7173	2.89772	1149.43	14.0077	7.0238	1085.12	11.4628	11.5073	1107	8.56614	8.70603	34	26.469	50.0803	<200	<18.7	<15.0	135.495	502491	492867	<0.262	<0.0253	2.34845	0.0314834	0.128596	<0.145	0.203011	2.38971	0.70517
91500_A5	T17AU22B027.csv		1086.43	2.65776			5.44628	1.33359	0.0714906	3.82918	1.78258	5.50496	0.183567	1.32888	0.328894	0.0546524	4.22045	0.915945		1086.43	2.65776	2.84196	970.564	16.0946	8.0647	1039.12	11.0099	11.0562	1078.58	8.44089	8.58282	34	27.389	50.0817	<199	<18.2	27.7756	133.492	502955	492848	<0.251	<0.0267	2.36014	0.0254044	0.196432	0.575509	0.294369	2.03392	0.761825
91500_A5	T17AU22B028.csv		1067.63	2.68496			5.5506	1.34714	0.078047	4.03958	1.90823	5.69818	0.180121	1.34248	0.316358	0.0526384	3.97751	0.914354		1067.63	2.68496	2.86742	1147.18	13.989	7.01448	1083.97	11.3964	11.4411	1039.84	7.95503	8.10547	34	27.389	50.0799	<202	<18.1	24.2807	134.633	502911	492799	<0.246	0.0351159	2.53634	<0.0221	<0.082	0.249366	0.208819	2.43926	0.772704
91500_D1	T17AU22B036.csv		1063.73	2.80089			5.57348	1.47296	0.0780618	4.24969	1.89532	5.86369	0.179408	1.40044	0.32749	0.0544993	4.28226	0.914025		1063.73	2.80089	2.97624	1147.56	14.711	7.37449	1079.45	11.7274	11.7709	1075.64	8.56452	8.70443	34	27.389	50.0752	<213	<17.6	<15.7	131.688	505241	492713	<0.203	<0.0458	2.45068	<0.0341	0.29318	0.226936	0.23737	1.99794	0.671299
91500_D1	T17AU22B037.csv		1073.29	2.7769			5.51975	1.41167	0.0705816	4.10652	1.73023	5.70548	0.181157	1.38845	0.32509	0.056328	4.2909	0.914832		1073.29	2.7769	2.95368	944.407	17.81	8.9207	1019.84	11.411	11.4557	1110.76	8.5818	8.72143	34	27.389	50.0811	<211	<17.4	<15.6	128.459	505813	492892	<0.198	<0.0471	2.52118	<0.0351	0.1931	0.549033	0.195887	2.06276	0.757172
91500_D1	T17AU22B038.csv	avoided slight common Pb at begin	1098.96	2.84241			5.38831	1.42561	0.0827862	3.94761	2.08474	5.58636	0.185869	1.42121	0.339662	0.0604787	4.32559	0.91701		1098.96	2.84241	3.01535	1263.31	12.2072	6.12648	1143.8	11.1727	11.2184	1190.25	8.65118	8.78972	34	21.625	50.0816	<237	<19.7	<17.6	134.778	506594	492915	<0.22	<0.0549	2.55534	0.0454449	<0.145	0.486908	0.231789	1.78323	0.828114
91500_D1	T17AU22B039.csv		1081.15	2.65235			5.47631	1.33089	0.0735907	4.65289	1.81831	6.01426	0.182599	1.32617	0.275007	0.0526473	4.0863	0.915498		1081.15	2.65235	2.8369	1029.36	18.2753	9.15294	1052.08	12.0285	12.0709	1040.01	8.1726	8.31911	34	27.389	50.0851	<205	<17.1	<15.3	145.6	506362	493006	<0.189	<0.0489	2.58134	<0.0365	<0.13	0.238527	0.194509	2.21875	0.845588
91500_D1	T17AU22B040.csv		1067.57	2.72769			5.55206	1.34035	0.0740983	3.68332	1.80601	5.42366	0.18011	1.36385	0.341959	0.0548192	4.33429	0.914349		1067.57	2.72769	2.90746	1043.25	14.2446	7.14193	1047.63	10.8473	10.8943	1081.79	8.66859	8.80685	34	27.389	50.0863	<202	<17.1	<15.2	139.607	506174	493054	<0.186	<0.0497	2.64213	<0.0371	0.194628	0.594701	0.228613	2.16012	0.823643
91500_D1	T17AU22B045.csv		1081.44	3.05243			5.47506	1.50035	0.0751982	4.45785	1.86062	5.94209	0.182651	1.52621	0.318981	0.0526714	4.83892	0.915522		1081.44	3.05243	3.21409	1072.91	16.6889	8.36121	1067.21	11.8842	11.9271	1040.47	9.67785	9.80188	34	27.389	50.0834	<197	<18.0	<15.3	61.2207	506155	493017	<0.193	<0.054	1.78508	<0.0398	0.166045	<0.181	0.0746178	0.649616	0.334713
91500_D1	T17AU22B046.csv		1073.85	3.05532			5.51713	1.52981	0.0764854	4.5502	1.87873	6.00543	0.181259	1.52766	0.318678	0.0591009	4.80526	0.914879		1073.85	3.05532	3.21683	1106.91	16.4279	8.23098	1073.61	12.0109	12.0533	1163.9	9.61052	9.73541	34	27.389	50.0844	<194	<18.2	<15.2	56.9921	507023	493048	<0.195	<0.0541	1.68868	<0.0396	<0.155	0.374707	0.071087	0.793714	0.309342
91500_D5	T17AU22B011.csv		1047.24	2.5184			5.66717	1.26417	0.076386	3.37566	1.87232	5.23286	0.176394	1.2592	0.350709	0.0532313	3.74182	0.912637		1047.24	2.5184	2.71208	1104.31	12.2207	6.13324	1071.35	10.4657	10.5144	1051.25	7.48365	7.64337	34	27.388	50.0678	<195	<20.5	<15.5	149.846	498808	492491	<0.319	<0.0281	2.87482	<0.035	0.283311	0.576196	0.272863	2.55077	0.926131
91500_D5	T17AU22B012.csv	avoided slight discordance at end	1065.57	2.62244			5.56231	1.30008	0.0729732	3.9154	1.81917	5.61048	0.179744	1.31122	0.315124	0.0559334	3.73665	0.91418		1065.57	2.62244	2.80895	1012.31	15.6782	7.85694	1052.39	11.221	11.2664	1103.19	7.4733	7.63324	34	26.421	50.0654	<201	<21.4	<15.9	152.162	498530	492419	<0.335	0.0312406	2.77208	<0.0332	0.217373	0.488101	0.271164	2.61881	0.872257
91500_D5	T17AU22B013.csv		1036.35	2.51292			5.73214	1.26144	0.0746867	3.39881	1.80166	5.2464	0.174408	1.25646	0.347949	0.0552027	3.77464	0.911723		1036.35	2.51292	2.70699	1059.18	12.9156	6.47942	1046.06	10.4928	10.5414	1089.16	7.54928	7.70764	34	27.286	50.0659	<198	<21.4	<15.7	153.057	498884	492435	<0.336	0.0243218	2.79915	<0.0302	<0.142	0.530995	0.285898	2.75961	0.907651
91500_D5	T17AU22B014.csv		1037.85	2.50743			5.72243	1.2587	0.0713571	4.00524	1.72153	5.59841	0.174682	1.25371	0.299808	0.0545197	3.68936	0.911849		1037.85	2.50743	2.7019	966.749	16.911	8.47203	1016.6	11.1968	11.2424	1076.03	7.37872	7.54066	34	27.389	50.0667	<199	<21.6	<15.7	154.292	499469	492458	<0.339	<0.021	2.90623	<0.0279	0.199913	0.309036	0.28883	2.19955	0.926565
91500_D5	T17AU22B015.csv		1062.58	2.51624			5.57824	1.26309	0.0713189	3.4754	1.76188	5.29632	0.179196	1.25812	0.341578	0.0553288	3.81838	0.913928		1062.58	2.51624	2.71007	965.657	14.6929	7.3655	1031.54	10.5926	10.6408	1091.58	7.63677	7.79335	34	27.389	50.0695	<196	<21.3	<15.4	152.6	499444	492540	<0.334	0.0270442	2.94717	0.0470563	0.193117	0.54809	0.285869	2.47235	0.990227
91500_D5	T17AU22B016.csv		1065.91	2.55968	1061.62	2.54362	5.55931	1.28473	0.0784171	3.42832	1.94055	5.26129	0.179807	1.27984	0.35091	0.0570586	3.84548	0.914209		1065.91	2.55968	2.75046	1156.58	11.7596	5.90357	1095.19	10.5226	10.571	1124.78	7.69096	7.84646	34	27.389	50.0709	<194	<21.1	<15.3	145.429	499760	492585	<0.33	0.0488548	2.77103	0.0556965	0.396616	0.614411	0.227093	2.39449	0.860068
91500_D5	T17AU22B017.csv		1058.77	2.65742	1055.42	2.64331	5.60001	1.34921	0.0773951	3.66308	1.89829	5.3572	0.1785	1.32871	0.345627	0.0533418	4.16413	0.913607		1058.77	2.65742	2.84164	1130.5	12.904	6.47368	1080.49	10.7144	10.762	1053.38	8.32826	8.47208	34	27.389	50.0707	<195	<21.0	<15.3	146.184	500027	492576	<0.328	0.0555121	2.91792	0.0277955	0.308544	0.576574	0.301671	1.96801	0.908264
																																						134.246					2.55363		0.262223	0.480576	0.222844	2.15348	0.777044
AusZ-5	T17AU22B069.csv		37.3621	7.27183	36.6419	7.59182	172.035	4.75289	0.0620526	13.9494	0.0495673	14.1348	0.00581264	3.63592	0.322518	0.00201594	7.33209	0.838015		37.3621	7.27183	7.34116	674.969	88.368	44.1872	49.1222	28.2696	28.2876	40.8218	14.6642	14.7463	34	27.389	50.0787	<171	<24.2	21.1027	685.583	508865	492340	<0.381	<0.0396	3.03013	0.0771216	1.13715	1.95421	1.85905	13.1438	4.96567
AusZ-5	T17AU22B070.csv		39.2894	7.52686			163.611	4.9197	< DL	18.4264	< DL	18.5645	0.0061134	3.76343		0.0025085	6.87233	0.838139		39.2894	7.52686	7.59386	< DL	#NUM!	#NUM!	< DL	37.129	37.1428	50.7832	13.7447	13.8323	34	25.896	50.0795	<172	<24.3	22.4436	675.47	509026	492370	<0.39	<0.0389	2.90718	0.0488282	0.89592	2.18919	1.98156	12.9743	4.69819
AusZ-5	T17AU22B071.csv		36.2038	8.05932	35.6875	8.33625	177.553	4.7933	0.0580504	14.72	0.0449896	14.8782	0.00563193	4.02966	0.309629	0.00184347	7.70412	0.83794		36.2038	8.05932	8.12193	530.686	121.503	60.754	44.6839	29.7563	29.7735	37.3325	15.4082	15.4865	34	27.389	50.0767	<173	<24.4	<15.9	672.125	509382	492343	<0.397	<0.0382	2.84336	0.0498652	1.26874	1.96814	1.87031	12.9718	4.7832
AusZ-5	T17AU22B072.csv		37.8749	8.06736			169.695	4.80209	< DL	22.1209	< DL	22.2341	0.00589265	4.03368		0.00207712	7.39031	0.838048		37.8749	8.06736	8.12991	< DL	#NUM!	#NUM!	< DL	44.4682	44.4797	42.0593	14.7806	14.8621	34	27.389	50.0765	<176	<24.6	<16.2	670.942	509425	492336	<0.409	<0.0379	2.85943	0.0825991	0.994691	2.00932	1.85589	12.3204	4.89
AusZ-5	T17AU22B073.csv	avoided instability at begiin	39.2789	8.59955			163.726	5.11241	< DL	18.6208	< DL	18.7461	0.00611176	4.29978		0.00233672	7.23969	0.838138		39.2789	8.59955	8.65826	< DL	#NUM!	#NUM!	< DL	37.4921	37.5057	47.3097	14.4794	14.5626	34	25.652	50.0774	<179	<24.8	<16.4	664	509587	492368	1.65553	<0.0377	3.06671	0.0579242	0.93631	2.23612	1.81585	11.961	4.70786
AusZ-5	T17AU22B074.csv		38.282	7.52174			167.883	4.74218	0.0453005	16.3247	0.0371997	16.4779	0.00595618	3.76087	0.278959	0.00212199	7.35133	0.838074		38.282	7.52174	7.58878	7.27596e-08	5.44904e+11	5.44904e+11	37.0863	32.9557	32.9712	42.9669	14.7027	14.7846	34	27.389	50.0759	<178	<24.4	<16.3	664.247	509555	492326	<0.418	<0.0366	2.96895	0.067499	0.954944	2.12466	1.89993	11.8792	4.95242
Mudtank_B5	T17AU22B079.csv		699.119	6.43467	699.119	6.43467	8.55988	3.60266	0.0786741	10.8078	1.27052	11.1997	0.116813	3.14241	0.316233	0.0295266	8.30238	0.885656		712.193	6.28482	6.36491	1163.06	36.8304	18.4228	832.623	22.3994	22.4222	589.835	16.6048	16.6773	34	27.389	49.981	<182	<23.1	<16.4	62.885	506753	489824	<0.423	<0.0349	0.700192	0.0823119	0.522427	0.887895	0.638045	3.46797	0.995562
Mudtank_B5	T17AU22B080.csv		687.902	6.7536	687.902	6.7536	8.84415	3.55295	0.0656394	11.9048	1.02642	12.2527	0.113058	3.34381	0.285982	0.0283981	8.48456	0.883987		690.48	6.68763	6.76294	793.963	62.8856	31.4472	717.136	24.5054	24.5263	567.605	16.9691	17.0402	34	27.389	49.9799	<185	<23.0	<16.7	62.1254	507289	489791	<0.426	<0.0353	0.877924	0.0377127	0.800549	0.831242	0.761163	3.60869	0.917395
Mudtank_B5	T17AU22B081.csv		695.288	7.01437	695.288	7.01437	8.73798	4.08232	0.066519	12.3278	1.05327	12.6362	0.114431	3.4707	0.314361	0.0371943	7.86119	0.884597		698.428	6.94139	7.01398	821.818	62.6334	31.3211	730.502	25.2725	25.2927	740.241	15.7224	15.799	34	27.389	49.9807	<183	<22.3	<16.4	56.9649	506895	489818	<0.416	<0.0349	0.656902	0.0648989	0.412841	1.07176	0.523866	3.08874	0.821368
Mudtank_B5	T17AU22B082.csv		657.149	8.23649	657.149	8.23649	8.97067	4.55174	0.092244	10.7273	1.42245	11.0698	0.111487	4.04813	0.390607	0.0343396	8.11887	0.88329		681.374	8.09627	8.15859	1471.57	27.6674	13.8438	898.389	22.1396	22.1627	684.375	16.2377	16.312	34	27.052	49.982	<186	<22.1	<16.6	59.795	506831	489856	<0.415	0.0369164	0.649683	0.0530395	0.436149	0.991756	0.557118	3.81271	0.886923
Mudtank_B5	T17AU22B087.csv		711.073	7.31827	711.073	7.31827	8.5683	4.67628	0.063767	12.6947	1.03161	12.9885	0.116716	3.63986	0.345658	0.0406116	7.64397	0.885613		711.63	7.27971	7.34896	732.966	73.3572	36.6824	719.733	25.9771	25.9967	806.914	15.2879	15.3668	34	26.727	49.9862	<183	<19.3	<16.0	58.7752	506525	489987	<0.36	<0.0383	0.567497	0.096439	0.701621	0.691768	0.529557	3.31275	0.820266
Mudtank_B5	T17AU22B088.csv		692.126	6.91326	692.126	6.91326	8.47537	4.08056	0.0948577	9.71845	1.55168	10.1691	0.117973	3.36398	0.387136	0.0350173	7.64954	0.886172		718.883	6.72795	6.80282	1524.41	24.0263	12.0248	951.163	20.3381	20.3632	697.652	15.2991	15.3778	34	27.389	49.9852	<186	<19.2	<16.2	62.6196	506143	489953	<0.353	<0.0402	0.81692	0.0762861	0.556355	0.894071	0.583074	3.71145	0.988105
Mudtank_B5	T17AU22B089.csv		720.183	6.63948	720.183	6.63948	8.18908	3.82899	0.0896895	10.0892	1.51861	10.516	0.122097	3.22867	0.354822	0.024891	9.15188	0.888011		742.619	6.45734	6.53531	1418.07	27.1999	13.6103	937.916	21.032	21.0563	498.361	18.3038	18.3697	34	27.389	49.9838	<183	<18.5	<15.9	61.8006	505738	489910	<0.333	0.0658632	0.731935	0.0503975	0.511709	0.841287	0.53536	3.97482	0.855688
OG-1_D4	T17AU22B098.csv		3472.3	2.07486			1.40206	1.04959	0.3002	1.11854	29.603	4.21806	0.713677	1.03743	0.684272	0.201088	2.70694	1.15219		3472.3	2.07486	2.3061	3470.57	0.998384	0.727439	3473.73	8.43612	8.49648	3714	5.41388	5.63261	34	23.445	49.9829	214.192	<20.1	38.5926	623.597	502461	488228	<0.192	0.195634	8.48953	0.0997748	1.478	3.09316	0.82664	12.3301	3.93756
OG-1_D4	T17AU22B099.csv	slight reverse discordance	3521.68	1.96372			1.3785	0.988222	0.299343	0.998769	30.1861	4.19267	0.726856	0.98186	0.703344	0.188119	2.59933	1.15566		3521.68	1.96372	2.20664	3466.14	0.892903	0.692311	3492.89	8.38534	8.44606	3493.95	5.19866	5.42607	34	18.149	49.9451	<237	<24.0	36.8642	877.463	501973	487953	<0.194	0.435974	14.04	0.796061	8.56543	7.24144	2.03475	20.5416	5.64547
OG-1_D4	T17AU22B100.csv		3467.15	1.95416			1.40379	0.990922	0.297079	0.929839	29.2686	4.20282	0.71231	0.977078	0.729225	0.192064	2.5708	1.15182		3467.15	1.95416	2.19813	3454.37	0.83483	0.673951	3462.57	8.40565	8.46623	3561.13	5.1416	5.37142	34	27.388	49.9998	295.778	<21.5	24.4109	1033.64	501306	487968	<0.149	2.30601	24.2746	2.75103	23.6997	15.9957	3.84553	33.6553	7.94027
OG-1_D4	T17AU22B101.csv	Reverse disocrant	3512.39	1.85416			1.38195	0.933813	0.300749	0.82227	30.0641	4.18827	0.72437	0.927078	0.750509	0.189993	2.50287	1.15503		3512.39	1.85416	2.10973	3473.39	0.733189	0.643713	3488.91	8.37655	8.43734	3525.9	5.00574	5.24153	34	24.309	50.0052	457.41	<24.4	38.0761	2031.53	500256	486334	<0.14	0.992757	23.6492	1.34979	13.1619	12.56	3.31399	50.9205	15.016
OG-1_D4	T17AU22B102.csv	Reverse disocrant	3525.99	2.29453			1.37627	1.16893	0.304353	1.33758	30.1951	4.27211	0.72801	1.14727	0.658042	0.192967	2.92432	1.15595		3525.99	2.29453	2.50558	3491.83	1.18479	0.794297	3493.18	8.54421	8.60381	3576.49	5.84864	6.05167	34	18.149	50.0338	519.348	<26.8	19.4564	560.512	501539	488360	<0.128	<0.0543	8.16784	0.0766605	1.12785	1.53466	0.443306	8.55435	3.08769
PLesovice_A4	T17AU22B051.csv		337.766	2.16431	337.766	2.16431	18.5482	1.08738	0.0550495	2.92999	0.403112	4.98549	0.0539161	1.0816	0.347933	0.0170106	4.55555	0.858222		338.518	2.1632	2.38589	413.234	31.6945	15.8561	343.903	9.97098	10.0221	341.904	9.1111	9.24274	34	27.389	49.9608	403.135	62.6817	59.9217	374.591	501872	487150	0.2516	<0.0531	1.85868	0.0909052	1.14994	1.81285	0.592776	9.09811	3.56997
PLesovice_A4	T17AU22B052.csv		337.962	1.92714			18.5796	0.968029	0.0520891	2.03488	0.380992	4.545	0.0538251	0.96357	0.429586	0.0184357	3.43336	0.858183		337.962	1.92714	2.17415	288.302	32.2558	16.1366	327.768	9.08999	9.14604	370.286	6.86672	7.04046	34	27.389	49.9532	620.966	104.926	83.7351	636.224	501301	486132	4.70166	<0.0521	3.67372	0.224198	2.64328	4.13687	0.949127	16.1503	5.99902
PLesovice_A4	T17AU22B053.csv		340.268	1.91364			18.4503	0.963349	0.0525829	1.9849	0.38751	4.52377	0.0542022	0.956822	0.436631	0.0197654	3.51336	0.858344		340.268	1.91364	2.16219	309.827	29.1651	14.5922	332.549	9.04754	9.10385	396.734	7.02672	7.19659	34	27.389	49.9589	681.228	92.9851	288.637	675.262	501539	485610	5.60447	0.423897	6.61292	0.833576	5.70202	6.05894	2.06409	18.7647	6.68634
PLesovice_A4	T17AU22B054.csv		336.234	1.95905	336.234	1.95905	18.6371	0.99039	0.0549177	2.2208	0.400886	4.61655	0.0536588	0.984042	0.407295	0.0170417	3.34291	0.858112		336.944	1.96808	2.21052	407.873	24.3615	12.1922	342.29	9.23311	9.28829	342.522	6.68582	6.86414	34	27.389	49.9554	626.871	76.6656	19.2949	749.098	501523	486058	3.59039	<0.0522	3.60505	0.418337	5.02598	7.68545	1.79227	23.1967	7.84218
PLesovice_A4	T17AU22B055.csv		335.062	2.02758	335.062	2.02758	18.7164	1.02301	0.0543575	2.46751	0.39535	4.74286	0.0534313	1.01686	0.382981	0.0173747	3.77897	0.858015		335.553	2.03372	2.26916	384.885	28.8003	14.4099	338.27	9.48572	9.53945	349.158	7.55794	7.71613	34	27.389	49.9488	496.595	86.7374	18.6632	565.576	502040	486437	<0.253	<0.0519	2.53833	0.239039	2.76098	4.77249	1.2052	16.8865	5.99152
Plesovice_B5	T17AU22B075.csv		335.917	2.30288	335.917	2.30288	18.6826	1.1509	0.0536413	3.60731	0.396056	5.4155	0.0535222	1.14544	0.303951	0.019192	4.91816	0.858054		336.109	2.29088	2.50224	355.012	45.8879	22.9501	338.784	10.831	10.8781	385.334	9.83631	9.95837	34	27.389	49.9253	252.601	49.1822	<15.8	339.892	503852	486903	<0.408	<0.0349	1.58173	0.0476394	1.29654	1.84101	0.599973	8.41979	3.20628
Plesovice_B5	T17AU22B076.csv		330.097	2.33047	330.097	2.33047	18.9701	1.16219	0.0556384	3.64813	0.404807	5.47506	0.0527108	1.15678	0.303541	0.015567	5.36904	0.857707		331.142	2.31357	2.52302	436.973	37.1649	18.59	345.128	10.9501	10.9967	313.111	10.7381	10.85	34	27.389	49.9266	278.885	61.1654	<16.0	330.227	503759	486780	<0.413	0.0422459	1.72187	0.0983393	0.871902	2.46715	0.572674	7.96636	3.0876
Plesovice_B5	T17AU22B077.csv		329.357	2.31282			19.0754	1.16182	0.0513229	3.8049	0.37155	5.60789	0.0524194	1.15641	0.292037	0.0166474	5.22815	0.857583		329.357	2.31282	2.52234	254.332	68.7881	34.3981	320.801	11.2158	11.2613	334.663	10.4563	10.5712	34	27.389	49.938	387.021	85.0568	<15.9	334.349	503405	486522	<0.413	<0.0343	1.54495	0.122919	1.1202	2.17715	0.626912	8.30624	3.16131
Plesovice_B5	T17AU22B078.csv		336.219	2.3032			18.676	1.15703	0.0519978	3.48973	0.384685	5.38181	0.0535402	1.1516	0.314707	0.0165851	5.23307	0.858061		336.219	2.3032	2.51352	284.293	56.1376	28.0738	330.479	10.7636	10.811	333.421	10.4661	10.5809	34	27.389	49.9279	322.655	53.2614	<16.0	331.302	503388	486628	<0.415	<0.0342	1.6415	0.0645461	1.21478	2.10787	0.48835	8.12352	3.19194
QingHu_A4	T17AU22B056.csv		155.641	2.28893	155.641	2.28893	40.798	1.13554	0.0515804	3.57676	0.172209	5.4226	0.0245121	1.13	0.302593	0.0076469	2.9766	0.845788		156.109	2.26001	2.474	265.829	61.7389	30.874	161.334	10.8452	10.8922	154.412	5.9532	6.15278	34	27.389	49.9144	357.753	<21.5	<15.4	1245.32	502059	485945	<0.265	<0.0518	13.977	0.135367	2.78205	5.42229	0.645505	28.053	9.06029
QingHu_A4	T17AU22B057.csv	avoided slight common Pb at begin	158.263	2.52837	158.263	2.52837	40.1205	1.26324	0.0518403	4.5655	0.175942	5.83883	0.0249365	1.23914	0.266672	0.0078813	3.14667	0.845966		158.779	2.47828	2.67487	277.351	75.3754	37.6914	164.562	11.6777	11.7213	159.127	6.29334	6.48246	34	26.41	49.9413	269.492	<22.4	<15.8	1099.34	503087	487058	<0.28	<0.0522	10.6808	0.201048	3.18093	5.42029	0.706298	25.1988	8.17829
QingHu_A4	T17AU22B058.csv		160.525	2.4444	160.525	2.4444	39.5202	1.22979	0.0521094	3.44589	0.179828	5.29166	0.0253044	1.21136	0.336122	0.00734007	3.52684	0.84612		161.093	2.42272	2.62347	289.194	54.4453	27.2278	167.913	10.5833	10.6315	148.239	7.05368	7.22292	34	27.389	49.9162	324.531	<22.3	<15.6	607.181	503075	486703	7.40481	0.38105	17.5041	0.328084	2.45399	2.02071	0.313532	10.0496	3.69483
QingHu_A4	T17AU22B059.csv		155.888	1.98471	155.888	1.98471	40.847	0.994073	0.0493481	2.55156	0.164874	4.77835	0.0244824	0.987748	0.363016	0.00807896	2.72965	0.845776		155.922	1.9755	2.21712	163.357	73.02	36.5138	154.961	9.5567	9.61003	163.102	5.45929	5.67627	34	27.389	49.8033	288.603	<22.5	16.9709	1112.4	500824	484435	13.5523	0.0875593	26.9039	0.183857	2.29899	4.12053	0.323244	21.8208	7.44774
QingHu_A4	T17AU22B060.csv		153.839	2.32188			41.4068	1.16991	0.0490382	4.39377	0.161731	5.96571	0.0241513	1.16094	0.2573	0.00770922	2.96535	0.845637		153.839	2.32188	2.53065	148.609	138.595	69.2993	152.218	11.9314	11.9742	155.666	5.9307	6.13101	34	27.389	49.9249	321.594	<23.6	<16.0	1058.97	503432	486710	5.3479	0.245368	16.9085	0.202584	3.29806	4.98143	0.829971	22.3791	7.25855
Temora_A1	T17AU22B090.csv		419.641	2.96277	419.641	2.96277	14.8054	1.53149	0.0584277	5.01832	0.547224	6.36641	0.0675333	1.46664	0.29189	0.0214064	4.57426	0.864066		421.276	2.93328	3.10116	544.86	40.2482	20.1311	443.177	12.7328	12.7729	429.326	9.14852	9.27963	34	27.389	49.9884	<183	<18.1	<15.8	605.865	504932	489615	<0.318	<0.0422	3.65923	0.0407445	0.762094	1.61683	0.295276	8.2228	3.09369
Temora_A1	T17AU22B091.csv		414.373	2.58477	414.373	2.58477	15.0505	1.30353	0.0555793	3.91204	0.512078	5.61501	0.0664338	1.29029	0.316122	0.0190118	4.41146	0.863592		414.633	2.58058	2.76992	434.608	40.0868	20.0504	419.846	11.23	11.2754	381.748	8.82291	8.95879	34	27.389	50.0036	225.695	<17.9	<15.7	1007.01	503399	488660	<0.302	<0.0438	5.33781	0.0496975	0.871356	2.5122	0.523732	13.1578	4.90102
Temora_A1	T17AU22B092.csv		414.532	3.47895	414.532	3.47895	14.8893	1.77396	0.0639241	5.78534	0.595311	6.94363	0.067153	1.71269	0.293158	0.0209624	4.80575	0.863902		418.979	3.42539	3.5702	738.174	33.167	16.5919	474.254	13.8873	13.924	420.512	9.6115	9.73638	34	27.389	50.0062	<186	<17.9	<15.8	1445.42	503560	489199	<0.288	<0.0457	2.96369	0.235693	3.84726	5.63788	1.28107	31.4789	10.318
Temora_A1	T17AU22B093.csv		408.673	3.2973	408.673	3.2973	15.132	1.62664	0.062597	5.60882	0.573546	6.80848	0.0660761	1.62279	0.278538	0.0195202	4.48767	0.863438		412.47	3.24558	3.39806	693.618	34.4702	17.2432	460.305	13.617	13.6544	391.86	8.97534	9.10894	34	27.389	50.0187	<209	<19.8	166.042	2024.66	503774	488599	<0.303	0.0737815	4.30649	0.345556	4.90674	9.43698	1.97629	50.5724	16.1709
Temora_A4	T17AU22B065.csv		416.463	2.72226			14.9843	1.40715	0.0542183	4.57479	0.495836	6.04801	0.0667366	1.36113	0.293996	0.0198689	4.22741	0.863722		416.463	2.72226	2.90237	379.122	54.2628	27.1366	408.88	12.096	12.1382	398.792	8.45481	8.59651	34	27.389	49.9869	<172	<24.0	<15.7	654.833	505999	489568	<0.351	<0.044	4.26231	0.0627568	1.21111	1.68188	0.31295	11.0179	3.78362
Temora_A4	T17AU22B066.csv		424.03	2.74276			14.7081	1.37594	0.0532761	4.72324	0.496733	6.15699	0.0679895	1.37138	0.279687	0.0217546	4.28695	0.864262		424.03	2.74276	2.92161	339.562	62.9893	31.4991	409.489	12.314	12.3554	436.235	8.5739	8.71366	34	27.389	50.0107	294.841	<23.3	26.6292	694.934	504792	488703	<0.347	<0.0414	3.76599	<0.0258	0.876923	1.51448	0.252199	9.12283	3.29482
Temora_A4	T17AU22B067.csv		405.517	3.88213			15.4018	1.96061	0.0521021	7.6865	0.464226	8.53936	0.0649268	1.94107	0.247158	0.023553	5.7101	0.862943		405.517	3.88213	4.01049	288.874	121.589	60.7967	387.193	17.0787	17.1086	471.88	11.4202	11.5255	34	27.389	50.0217	<165	<23.3	<15.1	592.08	506599	490561	<0.353	<0.0401	2.45182	0.0789727	0.655769	1.92831	0.361992	10.9089	3.71039
Temora_A4	T17AU22B068.csv		411.321	3.35793	411.321	3.35793	15.1521	1.69441	0.0563307	6.06155	0.510545	7.17835	0.0659963	1.659	0.269214	0.0218566	4.55288	0.863403		411.988	3.318	3.4673	464.437	57.8241	28.9169	418.816	14.3567	14.3923	438.258	9.10576	9.23748	34	27.389	50.0086	<168	<23.7	16.6517	1454.5	505726	489224	<0.367	<0.0398	3.10116	0.299635	3.26495	5.59891	1.0775	30.8154	10.4994
Temora_D1	T17AU22B094.csv		406.437	3.5263	406.437	3.5263	15.3543	1.74465	0.055367	6.52411	0.499877	7.55566	0.0651195	1.74106	0.258339	0.0221073	4.93799	0.863026		406.684	3.48211	3.62466	426.079	68.2922	34.1502	411.619	15.1113	15.1451	443.231	9.87597	9.99755	34	27.389	50.0021	<189	17.9661	<15.6	1319.68	503757	489149	<0.256	<0.0488	3.16582	0.189609	3.45652	5.8505	1.07941	29.6045	9.56717
Temora_D1	T17AU22B095.csv		413.743	2.72742			15.0841	1.3683	0.0503306	4.81935	0.46244	6.2324	0.0662866	1.36371	0.273122	0.0209789	3.76816	0.863528		413.743	2.72742	2.90721	209.257	106.766	53.3857	385.953	12.4648	12.5057	420.84	7.53633	7.69496	34	27.389	50.0065	240.579	27.6306	<15.2	1329.04	502694	488158	<0.232	<0.0491	4.23893	0.269499	3.32006	5.12103	0.898677	23.3587	7.95084
Temora_D1	T17AU22B096.csv		421.433	2.95537	421.433	2.95537	14.7748	1.54463	0.0566073	5.08648	0.530851	6.42068	0.0676746	1.46469	0.290571	0.0213222	4.13991	0.864126		422.129	2.92938	3.09747	475.282	47.3266	23.6692	432.374	12.8414	12.8811	427.654	8.27982	8.42446	34	27.389	49.9972	<192	<18.3	288.96	1386.72	502864	488377	<0.219	0.134378	5.1841	0.310169	3.94124	5.3035	1.15065	26.0314	8.91165
Temora_D1	T17AU22B097.csv		416.478	2.93824			14.9821	1.47338	0.0542097	5.21606	0.501162	6.52277	0.0667391	1.46912	0.271833	0.0201713	4.15763	0.863723		416.478	2.93824	3.10585	378.767	61.9309	30.97	412.488	13.0455	13.0847	404.801	8.31526	8.4593	34	27.389	49.984	<194	24.3133	<15.4	1215.87	503082	488755	<0.202	<0.0523	4.16885	0.162938	3.08146	5.24526	0.940406	23.1375	7.64574
Temora_D3	T17AU22B005.csv		417.715	3.36592			14.9374	1.68668	0.0543199	6.29643	0.512842	7.37321	0.0669437	1.68296	0.258755	0.0247641	4.95662	0.863811		417.715	3.36592	3.51318	383.334	73.8084	36.908	420.359	14.7464	14.781	495.851	9.91323	10.0344	34	27.389	50.0109	<181	<15.1	<15.2	412.894	494555	490451	<0.21	<0.0516	2.66866	<0.0463	0.43669	0.8925	0.190782	5.06895	1.92236
Temora_D3	T17AU22B006.csv		414.706	3.38876	414.706	3.38876	14.9659	1.80969	0.0594823	5.94799	0.558908	7.08186	0.0668109	1.67112	0.291078	0.0215526	5.10815	0.863754		416.912	3.34223	3.4905	583.824	44.2285	22.1206	450.816	14.1637	14.1997	432.227	10.2163	10.3339	34	27.389	50.0094	<185	<16.3	<15.3	691.109	494707	490106	<0.236	<0.0471	3.04205	0.052074	1.0125	2.15358	0.398825	11.2144	3.96899
Temora_D3	T17AU22B007.csv		407.05	2.78005			15.3394	1.39453	0.054673	4.77933	0.499876	6.19619	0.0651801	1.39003	0.280103	0.0210694	4.17377	0.863052		407.05	2.78005	2.95665	397.875	53.8394	26.9249	411.618	12.3924	12.4335	422.637	8.34754	8.49103	34	27.388	49.9812	<187	<17.4	<15.3	747.814	493726	489262	<0.258	0.0660888	3.59568	<0.0438	1.35365	1.98675	0.42243	11.2163	4.06635
Temora_D3	T17AU22B008.csv		406.908	2.82681			15.3441	1.41783	0.0600148	5.76819	0.547148	7.02297	0.0651566	1.41341	0.238697	0.0218648	4.32217	0.863042		406.908	2.82681	3.00065	603.141	41.3834	20.6985	443.126	14.0459	14.0823	438.421	8.64434	8.78298	34	27.388	49.9911	<189	<18.3	<15.3	603.74	494589	489718	<0.276	<0.0385	3.93904	<0.0418	1.03214	1.65155	0.374265	9.32483	3.53375
Temora_D3	T17AU22B009.csv		418.599	2.91903			14.9012	1.50064	0.0565221	5.001	0.529317	6.35707	0.06709	1.45951	0.287408	0.0206791	5.51212	0.863874		418.599	2.91903	3.08768	471.947	46.887	23.4495	431.356	12.7141	12.7543	414.886	11.0242	11.1333	34	27.389	49.9904	<191	<19.1	<15.3	748.029	495114	489520	<0.292	0.0377134	3.18834	<0.0395	0.992457	2.32867	0.40873	11.8653	4.35558
Temora_D3	T17AU22B010.csv		401.818	3.25416	401.818	3.25416	15.5281	1.63218	0.0555428	5.64863	0.49797	6.85382	0.0643792	1.61235	0.277595	0.0205814	4.33435	0.862707		402.201	3.22469	3.37812	433.144	58.0922	29.0509	410.327	13.7076	13.7449	412.946	8.66869	8.80695	34	27.388	49.9827	<196	<20.1	<15.7	1340.58	494553	488615	<0.311	<0.0316	3.59495	0.235728	3.79645	5.59907	0.96179	28.5111	9.22484
Calibraiton standard for Pb isotopes & TE:
NIST610	T17AU22B001.csv						4.35665	1.05406	0.908166	0.407965	90.447	4.1489	0.229638	1.05342	0.932586	0.504724	2.47149	0.937474														34	27.389		419.908	445.963	441.873	466.703	452.578	448	468.172	443.924	457.982	453.139	437.137	460.957	454.478	453.426	443.903
NIST610	T17AU22B002.csv						4.32386	1.07269	0.910893	0.407965	91.0017	4.15636	0.231338	1.0676	0.934684	0.506995	2.4892	0.938277														34	27.389		369.137	443.61	475.371	454.5	441.739	448	460.643	429.825	442.124	435.825	416.764	437.244	431.122	437.041	421.749
NIST610	T17AU22B018.csv						4.28879	1.07123	0.903716	0.407965	87.6923	4.15628	0.233075	1.06039	0.934523	0.5051	2.47536	0.939099														34	27.389		357.974	472.388	450.063	458.568	444.469	448	459.291	437.812	451.945	446.763	429.009	451.788	447.215	446.675	437.803
NIST610	T17AU22B019.csv						4.36234	1.05578	0.918173	0.407965	87.4597	4.15762	0.229148	1.05434	0.932783	0.503806	2.48643	0.937243														34	27.389		600.144	474.257	462.111	473.214	456.981	448	475.733	457.656	468.864	466.895	446.123	472.515	467.298	470.422	456.505
NIST610	T17AU22B041.csv						4.24431	1.07028	0.909161	0.407965	87.971	4.15393	0.235607	1.06926	0.934418	0.508995	2.48569	0.940296														34	27.389		287.222	405.163	450.748	449.943	439.562	448	453.896	425.561	438.751	431.752	417.064	436.931	429.291	431.365	419.663
NIST610	T17AU22B042.csv						4.28952	1.08759	0.909613	0.407965	87.1034	4.15139	0.233126	1.09015	0.936295	0.507414	2.48718	0.939123														34	27.389		380.731	452.221	481.478	465.195	447.133	448	465.492	441.422	453.367	447.458	428.062	455.124	445.474	447.857	434.254
NIST610	T17AU22B061.csv						4.30927	1.06256	0.908961	0.407965	87.4692	4.15876	0.232063	1.06236	0.933555	0.503301	2.47901	0.93862														34	27.389		463.118	459.83	438.652	462.075	452.431	448	469.297	439.928	455.031	450.064	433.062	453.413	449.804	447.441	441.683
NIST610	T17AU22B062.csv						4.28556	1.05651	0.908075	0.407965	87.9282	4.15893	0.233346	1.05056	0.932867	0.503389	2.48666	0.939227														34	27.389		426.077	460.716	450.52	466.526	452.421	448	472.326	440.294	453.883	449.882	431.619	450.972	448.993	456.61	439.148
NIST610	T17AU22B083.csv						4.31722	1.11391	0.914471	0.407965	89.0004	4.17307	0.231604	1.10621	0.939004	0.497475	2.48581	0.938403														34	27.389		328.011	431.513	457.28	462.108	446.753	448	464.873	444.499	456.499	453.153	431.295	456.828	449.679	454.548	440.707
NIST610	T17AU22B084.csv						4.28326	1.06956	0.908412	0.407965	89.142	4.15154	0.233439	1.05998	0.934338	0.504814	2.48127	0.939271														34	27.389		511.715	476.794	476.448	461.312	445.271	448	459.026	441.139	453.217	446.744	431.287	456.856	448.649	445.811	436.098
NIST610	T17AU22B105.csv						4.24767	1.121	0.906875	0.407965	89.2577	4.16974	0.235441	1.1182	0.939705	0.510446	2.48829	0.940218														34	27.389		402.13	480.857	455.809	463.25	446.004	448	462.983	440.052	450.599	448.129	427.546	454.06	445.526	451.835	435.731
NIST610	T17AU22B106.csv						4.2209	1.08451	0.911852	0.407965	90.2217	4.15376	0.236945	1.07428	0.935967	0.508585	2.47587	0.94093														34	27.388		406.185	420.602	455.659	460.606	450.657	448	468.27	437.863	453.718	446.159	431.004	449.276	446.411	444.913	436.655
Weighted Averages:
91500			1062.97	Wtd Mean (from internal errs)					0.0741467	Wtd Mean (from internal errs)			0.179264	Wtd Mean (from internal errs)						1062.97	Wtd Mean (from internal errs)		1056.49	Wtd Mean (from internal errs)		1048.91	Wtd Mean (from internal errs)		1079.02	Wtd Mean (from internal errs)
			5.04604	2-sigma err. of mean					0.00104206	2-sigma err. of mean			0.000851003	2-sigma err. of mean						5.04604	2-sigma err. of mean		24.4124	2-sigma err. of mean		20.9128	2-sigma err. of mean		15.6257	2-sigma err. of mean
			0.94157	MSWD					1.2654	MSWD			1.10784	MSWD						0.94157	MSWD		1.2055	MSWD		0.306682	MSWD		0.739406	MSWD
			0	rejected					0	rejected			0	rejected						0	rejected		0	rejected		0	rejected		0	rejected
			0.559407	Probability of fit					0.147403	Probability of fit			0.310561	Probability of fit						0.559407	Probability of fit		0.167204	Probability of fit		0.999928	Probability of fit		0.851968	Probability of fit
AusZ-2			37.9747	Wtd Mean (from internal errs)					0.0540855	Wtd Mean (from internal errs)			0.00590821	Wtd Mean (from internal errs)						37.9747	Wtd Mean (from internal errs)					43.096	Wtd Mean (from internal errs)		42.9626	Wtd Mean (from internal errs)
			1.21033	2-sigma err. of mean					0.00939399	2-sigma err. of mean			0.000188307	2-sigma err. of mean						1.21033	2-sigma err. of mean					7.55143	2-sigma err. of mean		2.5743	2-sigma err. of mean
			0.622714	MSWD					1.23683	MSWD			0.626392	MSWD						0.622714	MSWD					0.888714	MSWD		2.21205	MSWD
			0	rejected					0	rejected			0	rejected						0	rejected					0	rejected		0	rejected
			0.682482	Probability of fit					0.290303	Probability of fit			0.67965	Probability of fit						0.682482	Probability of fit					0.411184	Probability of fit		0.0501988	Probability of fit
Mudtank			695.554	Wtd Mean (from internal errs)					0.077001	Wtd Mean (from internal errs)			0.116206	Wtd Mean (from internal errs)						708.715	Wtd Mean (from internal errs)		1217.6	Wtd Mean (from internal errs)		820.278	Wtd Mean (from internal errs)		635.265	Wtd Mean (from internal errs)
			18.3722	2-sigma err. of mean					0.0123934	95%-conf. err. of mean			0.00301535	2-sigma err. of mean						18.3892	2-sigma err. of mean		307.673	95%-conf. err. of mean		71.2879	2-sigma err. of mean		98.6596	95%-conf. err. of mean
			0.597512	MSWD					2.42507	MSWD			0.743279	MSWD						0.666581	MSWD		2.33381	MSWD		1.2281	MSWD		4.16517	MSWD
			0	rejected					0	rejected			0	rejected						0	rejected		0	rejected		0	rejected		0	rejected
			0.732619	Probability of fit					0.0240571	Probability of fit			0.614724	Probability of fit						0.676746	Probability of fit		0.0296045	Probability of fit		0.288099	Probability of fit		0.000342764	Probability of fit
OG-1			3498.94	Wtd Mean (from internal errs)					0.299904	Wtd Mean (from internal errs)			0.72076	Wtd Mean (from internal errs)						3498.94	Wtd Mean (from internal errs)		3469.16	Wtd Mean (from internal errs)		3482.13	Wtd Mean (from internal errs)		3568.03	Wtd Mean (from internal errs)
			31.4948	2-sigma err. of mean					0.00268348	2-sigma err. of mean			0.00648785	2-sigma err. of mean						31.4948	2-sigma err. of mean		13.8601	2-sigma err. of mean		131.261	2-sigma err. of mean		84.5672	2-sigma err. of mean
			0.619493	MSWD					0.599888	MSWD			1.04032	MSWD						0.619493	MSWD		0.602129	MSWD		0.00859811	MSWD		0.753388	MSWD
			0	rejected					0	rejected			0	rejected						0	rejected		0	rejected		0	rejected		0	rejected
			0.648585	Probability of fit					0.662708	Probability of fit			0.384619	Probability of fit						0.648585	Probability of fit		0.661089	Probability of fit		0.999854	Probability of fit		0.55556	Probability of fit
Plesovice			335.736	Wtd Mean (from internal errs)					0.0533793	Wtd Mean (from internal errs)			0.0535171	Wtd Mean (from internal errs)						336.079	Wtd Mean (from internal errs)		346.99	Wtd Mean (from internal errs)		335.317	Wtd Mean (from internal errs)		353.216	Wtd Mean (from internal errs)
			2.36953	2-sigma err. of mean					0.000943194	2-sigma err. of mean			0.000377611	2-sigma err. of mean						2.37132	2-sigma err. of mean		39.9489	2-sigma err. of mean		11.1389	2-sigma err. of mean		19.5669	95%-conf. err. of mean
			0.96847	MSWD					1.02556	MSWD			0.961487	MSWD						0.912848	MSWD		1.02991	MSWD		0.225053	MSWD		3.00245	MSWD
			0	rejected					0	rejected			0	rejected						0	rejected		0	rejected		0	rejected		0	rejected
			0.458489	Probability of fit					0.413752	Probability of fit			0.46413	Probability of fit						0.504345	Probability of fit		0.410452	Probability of fit		0.986531	Probability of fit		0.00227449	Probability of fit
QingHu			156.581	Wtd Mean (from internal errs)					0.0505088	Wtd Mean (from internal errs)			0.0246337	Wtd Mean (from internal errs)						156.875	Wtd Mean (from internal errs)		220.726	Wtd Mean (from internal errs)		159.713	Wtd Mean (from internal errs)		156.489	Wtd Mean (from internal errs)
			1.60326	2-sigma err. of mean					0.00156719	2-sigma err. of mean			0.000250057	2-sigma err. of mean						1.59243	2-sigma err. of mean		71.7591	2-sigma err. of mean		7.73076	2-sigma err. of mean		4.25253	2-sigma err. of mean
			1.89646	MSWD					0.691038	MSWD			2.32313	MSWD						2.26739	MSWD		0.691892	MSWD		0.558483	MSWD		1.30242	MSWD
			0	rejected					0	rejected			0	rejected						0	rejected		0	rejected		0	rejected		0	rejected
			0.107983	Probability of fit					0.598036	Probability of fit			0.0541894	Probability of fit						0.0593837	Probability of fit		0.597444	Probability of fit		0.692822	Probability of fit		0.26645	Probability of fit
Temora			413.628	Wtd Mean (from internal errs)					0.0557602	Wtd Mean (from internal errs)			0.066379	Wtd Mean (from internal errs)						414.305	Wtd Mean (from internal errs)		456.483	Wtd Mean (from internal errs)		421.598	Wtd Mean (from internal errs)		421.813	Wtd Mean (from internal errs)
			2.96391	2-sigma err. of mean					0.00139178	2-sigma err. of mean			0.000473379	2-sigma err. of mean						2.95457	2-sigma err. of mean		55.3248	2-sigma err. of mean		13.2301	2-sigma err. of mean		12.1153	95%-conf. err. of mean
			0.937284	MSWD					1.18692	MSWD			1.04258	MSWD						0.97802	MSWD		1.23536	MSWD		0.622435	MSWD		1.63527	MSWD
			0	rejected					0	rejected			0	rejected						0	rejected		0	rejected		0	rejected		0	rejected
			0.52853	Probability of fit					0.265246	Probability of fit			0.406453	Probability of fit						0.479946	Probability of fit		0.226238	Probability of fit		0.87748	Probability of fit		0.0473355	Probability of fit
[truncated: 185 more columns]

## Sheet: Quad_Exp_1_SplitSteam
Analysis	Source Filename	Comment	Preferred Age	Preferred Age	207 corr 206Pb/238U	207 corr 206Pb/238U	238U/206Pb	238U/206Pb	207Pb/206Pb	207Pb/206Pb	207Pb/235U(calc)	207Pb/235U(calc)	206Pb/238U	206Pb/238U	Rho	208Pb/232Th	208Pb/232Th	CommPb at 206Pb/238U Age		206Pb/238U Age (Ma)	206Pb/238U Age (Ma)	206Pb/238U Age (Ma)	207Pb/206Pb Age (Ma)	207Pb/206Pb Age (Ma)	207Pb/206Pb Age (Ma)	207Pb/235U(calc) Age (Ma)	207Pb/235U(calc) Age (Ma)	207Pb/235U(calc) Age (Ma)	208Pb/232Th Age (Ma)	208Pb/232Th Age (Ma)	208Pb/232Th Age (Ma)	Spot Size (µm)	Time (s)	SiO4	31P	49Ti	56Fe	89Y	90Zr	91Zr	93Nb	139La	140Ce	141Pr	146Nd	147Sm	153Eu	157Gd	159Tb
			Ma	2s%	Age	2s%	ratio	1s%	ratio	1s%	ratio	1s%	ratio	1s%		ratio	1s%			Age	2s%	2s_sys%	Age%	2s%	2s_sys%	Age	2s%	2_sys%	Age	2s%	2s_sys%			ppm	ppm	ppm	ppm	ppm	ppm	ppm	ppm	ppm	ppm	ppm	ppm	ppm	ppm	ppm	ppm
Calibraiton standard for Pb/U and Pb/Th
91500	C17AU22A0003.csv						5.56952	0.486028	0.0733624	2.48651	1.84415	1.12228	0.179547	0.473733	0.191835	0.0521981	4.3941	0.914089		1064.49	0.947466	1.3823	1023.08	9.83568	9.8499	1061.34	2.24456	2.46174	1031.36	8.7882	8.92461	34	27.115		63.0892	4.91591	<6.03	137.3		493500	1.12757	<0.00137	2.61019	0.0112827	0.0428968	0.603822	0.216646	1.78602	0.740083
91500	C17AU22A0004.csv						5.57635	0.486028	0.0737889	2.72589	1.85167	1.12228	0.179326	0.473733	0.175532	0.0537916	4.3941	0.913987		1063.29	0.947466	1.3823	1034.8	10.6416	10.6547	1064.03	2.24456	2.46174	1062.03	8.7882	8.92461	34	27.115		108.928	4.29342	<6.12	127.846		493500	0.963177	<0.00138	2.34662	0.0074882	0.0695303	0.388794	0.192634	1.51435	0.666042
91500	C17AU22A0020.csv				1058.42	0.990708	5.59209	0.486028	0.0764154	2.18426	1.89943	1.12228	0.178816	0.473733	0.217202	0.0563274	4.3941	0.913753		1060.5	0.947466	1.3823	1105.08	7.90117	7.91886	1080.89	2.24456	2.46174	1110.75	8.7882	8.92461	34	27.115		43.4148	4.55177	<6.55	130.763		493500	1.0974	<0.00133	2.46039	0.012805	0.0929446	0.347335	0.186057	1.95475	0.804971
91500	C17AU22A0021.csv						5.56491	0.486028	0.0733092	3.00604	1.83052	1.12228	0.179702	0.473733	0.159611	0.0549892	4.3941	0.914161		1065.35	0.947466	1.3823	1021.61	11.9105	11.9222	1056.47	2.24456	2.46174	1085.06	8.7882	8.92461	34	27.115		64.1818	4.36252	<6.70	133.623		493500	1.07998	<0.00135	2.3676	0.00547501	0.0941033	0.503556	0.1963	2.1565	0.674753
91500	C17AU22A0043.csv				1059.05	1.02974	5.59924	0.486028	0.075137	2.7556	1.85289	1.12228	0.178653	0.473733	0.173697	0.0531667	4.3941	0.913678		1059.61	0.947466	1.3823	1071.27	10.3345	10.348	1064.46	2.24456	2.46174	1050.01	8.7882	8.92461	34	27.115		59.7407	4.92646	10.2419	133.888		493500	0.8468	<0.00135	2.38686	0.0186111	0.302771	0.623274	0.204176	2.42298	0.840516
91500	C17AU22A0044.csv						5.5618	0.486028	0.07325	2.51858	1.81764	1.12228	0.179793	0.473733	0.189481	0.0537505	4.3941	0.914203		1065.84	0.947466	1.3823	1019.97	9.99752	10.0115	1051.83	2.24456	2.46174	1061.24	8.7882	8.92461	34	27.115		57.6513	3.87653	<6.46	134.473		493500	1.01204	<0.00136	2.39034	0.00929456	0.199846	0.322352	0.269474	2.46885	0.683893
91500	C17AU22A0063.csv				1057.8	0.998786	5.59815	0.486028	0.0756958	2.32357	1.86053	1.12228	0.178555	0.473733	0.204742	0.0501334	4.3941	0.913632		1059.07	0.947466	1.3823	1086.14	8.5758	8.59211	1067.17	2.24456	2.46174	991.546	8.7882	8.92461	34	27.115		<34.0	4.12629	<6.57	136.475		493500	0.878718	0.00279976	2.55941	0.00358583	0.145749	0.317041	0.234662	2.53048	0.764953
91500	C17AU22A0064.csv						5.5172	0.486028	0.0749364	2.67726	1.86885	1.12228	0.181188	0.473733	0.17862	0.0523963	4.3941	0.914847		1073.46	0.947466	1.3823	1065.9	10.0993	10.1132	1070.12	2.24456	2.46174	1035.18	8.7882	8.92461	34	27.115		<33.8	5.78101	<6.54	135.352		493500	1.0883	0.00281378	2.46628	0.0167186	0.276906	0.348777	0.251786	2.21763	0.789563
91500	C17AU22A0085.csv						5.5789	0.486028	0.0743551	2.50998	1.83541	1.12228	0.179276	0.473733	0.190107	0.0563629	4.3941	0.913965		1063.02	0.947466	1.3823	1050.22	9.63233	9.64685	1058.22	2.24456	2.46174	1111.43	8.7882	8.92461	34	27.115		54.2034	4.66109	<6.30	135.992		493500	1.08405	<0.00137	2.65842	0.00747384	0.0960282	0.324785	0.192012	2.58726	0.736328
91500	C17AU22A0086.csv				1056.6	1.00456	5.60782	0.486028	0.0758983	2.39682	1.86434	1.12228	0.178387	0.473733	0.198736	0.0572087	4.3941	0.913555		1058.15	0.947466	1.3823	1091.5	8.79575	8.81165	1068.53	2.24456	2.46174	1127.66	8.7882	8.92461	34	27.115		33.4192	4.90466	<6.20	139.474		493500	1.07685	<0.00136	2.49347	0.00553397	0.200919	0.536612	0.255255	2.69061	0.756807
91500	C17AU22A0103.csv						5.53808	0.486028	0.0743735	2.53626	1.8554	1.12228	0.18051	0.473733	0.188207	0.0499887	4.3941	0.914534		1069.76	0.947466	1.3823	1050.72	9.72783	9.74221	1065.35	2.24456	2.46174	988.752	8.7882	8.92461	34	27.115		47.9841	4.66289	<6.03	138.466		493500	0.822319	<0.00135	2.63162	0.00926974	0.0948085	0.787018	0.230942	1.77356	0.747326
91500	C17AU22A0104.csv				1059.19	1.00435	5.59863	0.486028	0.0748907	2.42984	1.84918	1.12228	0.178626	0.473733	0.19614	0.055413	4.3941	0.913665		1059.46	0.947466	1.3823	1064.67	9.17827	9.19351	1063.14	2.24456	2.46174	1093.2	8.7882	8.92461	34	27.115		74.7908	4.76818	<6.02	136.86		493500	0.880984	<0.00136	2.79226	0.00931113	0.200484	0.141581	0.215882	2.01895	0.880566
Zircons treated as unknowns:
91500_A1	C17AU22A0029.csv		1053.61	1.79586			5.63061	0.857904	0.0734826	2.66379	1.80811	2.88703	0.177556	0.897929	0.306555	0.0552902	5.89137	0.913172		1053.61	1.79586	2.05868	1026.39	10.4977	5.27543	1048.39	5.77405	5.86189	1090.84	11.7827	11.8848	34	27.115	50.0923	45.4638	4.75977	<6.91	132.414		492939	0.880423	<0.00132	2.59868	0.0145144	0.16836	0.254548	0.261721	2.57001	0.728637
91500_A1	C17AU22A0030.csv		1056.09	1.60122			5.61638	0.807249	0.074406	2.65806	1.83487	2.92153	0.17801	0.800608	0.290593	0.0579835	5.66168	0.913381		1056.09	1.60122	1.89128	1051.6	10.1851	5.11998	1058.02	5.84307	5.92988	1142.51	11.3234	11.4295	34	27.115	50.0898	51.0652	4.20032	<6.97	136.642		492831	1.00029	0.00748469	2.26092	0.0109748	0.247475	0.407496	0.225416	1.95483	0.749171
91500_A1	C17AU22A0031.csv		1059.83	1.63944	1056.63	1.63232	5.59687	0.811753	0.0773111	2.29854	1.91307	2.653	0.178693	0.819722	0.333004	0.0561272	5.55492	0.913696		1059.83	1.63944	1.92375	1128.34	8.11524	4.09198	1085.65	5.30599	5.40145	1106.91	11.1098	11.2181	34	27.115	50.0893	55.4526	4.70585	<6.92	134.926		492795	1.05986	<0.00133	2.51548	0.00909406	0.272368	0.406155	0.201215	2.09456	0.81193
91500_A1	C17AU22A0032.csv		1054.69	1.73012	1053.77	1.72974	5.62802	0.804977	0.0752472	2.65569	1.8515	2.79233	0.177754	0.865059	0.290081	0.0574914	5.54739	0.913263		1054.69	1.73012	2.00159	1074.22	9.92808	4.99216	1063.96	5.58465	5.67543	1133.08	11.0948	11.2031	34	27.115	50.089	52.3633	4.65267	<6.86	139.073		492797	0.941016	<0.00133	2.62648	0.00907621	0.27184	0.405274	0.247676	2.17771	0.846862
91500_A1	C17AU22A0033.csv		1055.13	1.60652	1054.64	1.59671	5.62327	0.797548	0.0749138	2.26283	1.84381	2.66896	0.177835	0.803262	0.332413	0.0579721	5.80517	0.9133		1055.13	1.60652	1.89578	1065.29	8.54169	4.3035	1061.22	5.33793	5.43282	1142.29	11.6103	11.7139	34	27.115	50.091	63.4931	5.5599	6.96669	139.804		492783	1.06446	0.00506472	2.39122	0.0108268	0.320313	0.69772	0.175854	2.21696	0.851765
91500_A1	C17AU22A0034.csv		1046.06	1.59329	1042.16	1.59207	5.67965	0.803419	0.0774101	2.34649	1.88664	2.77418	0.176178	0.796646	0.32393	0.0546619	5.59309	0.912537		1046.06	1.59329	1.88458	1130.89	8.26275	4.16512	1076.4	5.54836	5.63972	1078.77	11.1862	11.2937	34	27.115	50.0912	81.38	4.23256	9.69113	141.808		492696	1.03455	<0.00135	2.49505	0.0110841	0.171996	0.471784	0.203798	2.41724	0.937867
91500_A1	C17AU22A0035.csv		1059.97	1.61347	1059.51	1.61649	5.59476	0.798997	0.0750603	2.55915	1.85563	2.81551	0.178719	0.806734	0.298024	0.0548975	5.36832	0.913708		1059.97	1.61347	1.90166	1069.22	9.61907	4.83855	1065.44	5.63101	5.72105	1083.3	10.7366	10.8486	34	27.115	50.0947	103.146	4.21846	8.96269	142.815		492697	0.914954	0.00513532	2.56416	0.00356489	0.247562	0.377151	0.233223	2.27673	0.892039
91500_A4	C17AU22A0047.csv		1057.29	1.62552	1054.08	1.62561	5.61119	0.803318	0.0772312	2.43532	1.89856	2.66223	0.17823	0.812762	0.313259	0.056025	5.78269	0.913482		1057.29	1.62552	1.9119	1126.28	8.6165	4.34062	1080.58	5.32447	5.4196	1104.95	11.5654	11.6694	34	27.115	50.0899	81.5702	4.55441	<6.55	136.016		492682	0.836988	0.00513775	2.60339	0.00912896	0.24787	0.376199	0.18614	1.89779	0.908326
91500_A4	C17AU22A0048.csv		1060.81	1.72913			5.58872	0.817194	0.0743348	2.51949	1.83376	2.76957	0.178872	0.864566	0.308526	0.0557667	5.5827	0.913778		1060.81	1.72913	2.00074	1049.67	9.67469	4.8662	1057.63	5.53914	5.63064	1099.99	11.1654	11.2731	34	27.115	50.0984	82.7161	3.80252	<6.65	137.832		492936	1.05858	<0.00134	2.53233	0.0147206	0.222561	0.46675	0.162909	2.04861	0.787413
91500_A4	C17AU22A0049.csv		1050.31	1.7223	1046.27	1.7209	5.65043	0.82102	0.0776676	2.52843	1.89499	2.75671	0.176953	0.861151	0.308842	0.0546236	5.54196	0.912894		1050.31	1.7223	1.99484	1137.5	8.84307	4.45309	1079.33	5.51342	5.60534	1078.03	11.0839	11.1924	34	27.115	50.0963	81.482	4.30569	<6.67	135.872		492880	0.908821	<0.00134	2.41421	0.0165708	0.145031	0.316686	0.186427	2.69364	0.81969
91500_A4	C17AU22A0050.csv		1073.31	1.66711	1072.83	1.68088	5.51842	0.839971	0.0755684	2.84871	1.88736	2.98757	0.18116	0.833556	0.282822	0.0604355	5.71156	0.914834		1073.31	1.66711	1.94739	1082.77	10.5521	5.30251	1076.65	5.97515	6.06007	1189.43	11.4231	11.5284	34	27.115	50.088	59.4775	4.03937	<6.69	137.022		492730	0.852073	<0.00135	2.25521	0.018562	0.146099	0.349075	0.211553	2.06289	0.755635
91500_A5	C17AU22A0022.csv		1064.11	1.6884			5.5769	0.82919	0.0730501	2.77567	1.82116	2.98466	0.179477	0.844202	0.286235	0.0525953	5.78584	0.914057		1064.11	1.6884	1.96564	1014.44	11.0875	5.56894	1053.1	5.96931	6.05432	1039.01	11.5717	11.6756	34	26.532	50.0945	91.05	4.39797	<6.67	135.294		492774	0.897107	<0.00133	2.68749	0.012982	0.0681682	0.442296	0.227734	1.41309	0.772601
91500_A5	C17AU22A0023.csv		1050.24	1.72492	1046.48	1.71282	5.65519	0.814423	0.0774419	2.30279	1.90228	2.58336	0.176941	0.862459	0.33343	0.0568678	5.89805	0.912889		1050.24	1.72492	1.99709	1131.7	8.10202	4.08542	1081.89	5.16671	5.26469	1121.12	11.7961	11.8981	34	27.115	50.0941	95.5851	4.07776	6.74867	138.982		492722	0.986336	0.00270671	2.47071	0.00887043	0.0905294	0.162913	0.204093	2.61548	0.887391
91500_A5	C17AU22A0024.csv		1051.42	1.64327	1044.84	1.65899	5.6477	0.821966	0.0798168	2.67006	1.96232	2.83103	0.177157	0.821634	0.294219	0.0586637	5.70213	0.912988		1051.42	1.64327	1.92701	1191.58	8.84435	4.45372	1102.68	5.66206	5.75161	1155.53	11.4043	11.5097	34	27.115	50.0925	77.5919	4.70632	<6.77	134.235		492781	0.928665	0.00276029	2.6006	0.00720851	0.0923133	0.25549	0.231459	2.5211	0.807691
91500_A5	C17AU22A0025.csv		1057.44	1.62594	1056.57	1.62302	5.60759	0.819451	0.0753033	2.43907	1.86272	2.80635	0.178257	0.812969	0.318475	0.0533616	6.05164	0.913495		1057.44	1.62594	1.91226	1075.71	9.10355	4.58243	1067.95	5.6127	5.70302	1053.76	12.1033	12.2027	34	27.115	50.0938	87.7747	4.66975	<6.79	134.771		492771	1.03925	<0.00131	2.40186	0.00899456	0.193272	0.283641	0.214636	2.01538	0.895747
91500_A5	C17AU22A0026.csv		1069.81	1.75147			5.53808	0.816872	0.0732261	2.52402	1.83366	2.75446	0.18052	0.875735	0.307915	0.0544317	5.80673	0.914538		1069.81	1.75147	2.02007	1019.31	10.0266	5.04116	1057.59	5.50893	5.60093	1074.34	11.6135	11.717	34	27.115	50.0929	69.8919	4.16966	<6.79	136.913		492831	0.849323	<0.00131	2.325	0.0180225	0.242584	0.370288	0.205659	1.83101	0.766463
91500_A5	C17AU22A0027.csv		1064.21	1.62215			5.56967	0.817644	0.0724058	2.66376	1.80221	2.95646	0.179494	0.811074	0.293439	0.0563069	5.97492	0.914065		1064.21	1.62215	1.90903	996.462	10.8621	5.45675	1046.26	5.91292	5.99873	1110.36	11.9498	12.0505	34	27.115	50.0924	72.456	4.52864	<6.84	133.264		492806	0.875232	<0.00131	2.30907	0.0144334	0.21801	0.430386	0.260305	1.89374	0.87304
91500_A5	C17AU22A0028.csv		1044.08	1.63917	1039.08	1.65656	5.68877	0.826163	0.0782599	2.74956	1.90715	2.96559	0.175817	0.819583	0.287762	0.0524294	6.03708	0.912371		1044.08	1.63917	1.92352	1152.59	9.46947	4.76421	1083.59	5.93118	6.01673	1035.82	12.0742	12.1738	34	27.115	50.0908	51.9827	5.02704	<6.94	134.843		492856	0.963082	0.00276741	2.31171	0.00722717	0.143708	0.196284	0.208523	1.8855	0.834069
91500_D1	C17AU22A0036.csv		1060.42	1.69915	1055.91	1.72739	5.59322	0.833636	0.0783979	3.03741	1.93839	3.22329	0.178801	0.849576	0.264669	0.0525836	5.62128	0.913745		1060.42	1.69915	1.97488	1156.09	10.4239	5.23873	1094.44	6.44658	6.52538	1038.78	11.2426	11.3495	34	27.115	50.089	52.7292	4.22304	<6.57	131.668		492800	0.996334	0.00277043	2.35992	0.0146113	0.143901	0.285693	0.208626	1.88675	0.712983
91500_D1	C17AU22A0037.csv		1078.4	1.78869			5.49183	0.862095	0.0737504	2.85269	1.85659	3.06664	0.182095	0.894344	0.289283	0.0555437	5.79026	0.915265		1078.4	1.78869	2.05243	1033.74	11.1497	5.59989	1065.77	6.13329	6.21605	1095.71	11.5805	11.6844	34	27.115	50.0955	76.2294	4.41806	<6.59	128.435		492884	0.869121	0.00281298	2.36654	0.0129634	0.146118	0.138564	0.164227	2.18195	0.674418
91500_D1	C17AU22A0038.csv		1080.06	1.83957	1076.09	1.85047	5.49536	0.87684	0.0786419	2.93119	1.97766	3.06667	0.182399	0.919786	0.286593	0.0628458	5.35654	0.915406		1080.06	1.83957	2.09692	1162.25	9.99697	5.02641	1107.92	6.13335	6.21611	1235.45	10.7131	10.8253	34	21.106	50.0922	60.3882	4.51176	<7.45	136.728		492856	1.10839	0.013988	2.72256	0.00799083	0.235121	0.680707	0.275636	2.18665	0.804362
91500_D1	C17AU22A0039.csv		1065.14	1.6292			5.56433	0.815998	0.0725658	2.69711	1.80165	2.9682	0.179666	0.814602	0.289582	0.055029	5.28734	0.914144		1065.14	1.6292	1.91503	1000.95	10.9413	5.49619	1046.06	5.9364	6.02187	1085.82	10.5747	10.6883	34	27.115	50.0926	38.2912	4.6969	<6.46	145.492		492969	1.1266	<0.00135	2.4572	0.0054935	0.146647	0.351649	0.292137	2.81314	0.850536
91500_D1	C17AU22A0040.csv		1053.42	1.59841			5.63286	0.805885	0.0714785	2.53664	1.75293	2.88289	0.177523	0.799203	0.302784	0.0536444	5.93193	0.913157		1053.42	1.59841	1.8889	970.218	10.6663	5.35932	1028.24	5.76578	5.85374	1059.2	11.8639	11.9653	34	27.115	50.094	47.5968	5.04631	<6.44	139.618		492973	1.11684	<0.00136	2.60716	0.00363435	0.199954	0.597807	0.237707	2.67932	0.746974
91500_D1	C17AU22A0045.csv		1066.17	1.8225			5.55907	0.917054	0.0715374	3.26432	1.77546	3.48751	0.179854	0.91125	0.270463	0.0493538	6.03197	0.914231		1066.17	1.8225	2.08196	971.9	13.6988	6.8698	1036.52	6.97501	7.0479	976.492	12.0639	12.1637	34	27.115	50.0943	51.8261	3.82443	<6.34	61.8928		493038	0.735637	<0.00132	1.72996	0.00353162	0.0667973	0.254138	0.0754574	1.12449	0.361927
91500_D1	C17AU22A0046.csv		1062.69	2.07017	1062.07	2.07447	5.57763	0.937035	0.0752909	3.28349	1.86171	3.46816	0.179217	1.03508	0.274422	0.0560696	5.94245	0.913937		1062.69	2.07017	2.30188	1075.38	12.2596	6.15261	1067.59	6.93632	7.00961	1105.8	11.8849	11.9861	34	27.115	50.0927	58.5631	3.53281	<6.54	57.2326		492961	0.884304	<0.00135	1.75714	<0.0014	0.0160743	0.138153	0.0927549	0.880013	0.26176
91500_D5	C17AU22A0011.csv		1060.84	1.68229	1060	1.67023	5.58917	0.774677	0.0754028	2.31395	1.8818	2.61962	0.178878	0.841143	0.317466	0.0552283	5.28873	0.913781		1060.84	1.68229	1.96039	1078.36	8.61192	4.33835	1074.7	5.23923	5.33588	1089.65	10.5775	10.6911	34	27.115	50.0846	96.9365	5.52209	11.984	156.376		492396	1.11816	<0.00136	2.81804	0.0168859	0.226689	0.662322	0.222866	2.84831	0.835878
91500_D5	C17AU22A0012.csv		1069.54	1.5421			5.53914	0.777958	0.0732346	2.40521	1.84333	2.66234	0.18047	0.771049	0.307749	0.0557483	5.53186	0.914515		1069.54	1.5421	1.8415	1019.55	9.55212	4.80528	1061.05	5.32467	5.4198	1099.64	11.0637	11.1724	34	26.415	50.0827	96.935	5.95694	9.43989	155.606		492344	1.09962	<0.00138	2.753	0.00960353	0.124877	0.396578	0.261802	3.20023	0.892405
91500_D5	C17AU22A0013.csv		1062.92	1.53591			5.57964	0.768812	0.0747184	2.20998	1.86687	2.55071	0.179259	0.767954	0.328568	0.055688	5.4599	0.913957		1062.92	1.53591	1.83632	1060.04	8.39012	4.2283	1069.42	5.10141	5.20063	1098.48	10.9198	11.0299	34	27.115	50.084	89.1721	5.60293	<6.36	156.644		492443	1.11012	<0.00135	2.92557	0.022377	0.25085	0.504733	0.284739	2.22662	0.920062
91500_D5	C17AU22A0014.csv		1057.25	1.59653	1056.26	1.58835	5.60867	0.7685	0.0753923	2.27109	1.87237	2.57767	0.178221	0.798266	0.32053	0.0579447	5.45923	0.913478		1057.25	1.59653	1.88732	1078.08	8.45492	4.26045	1071.37	5.15533	5.25353	1141.76	10.9185	11.0285	34	27.115	50.0798	48.0028	5.48299	<6.46	158.861		492518	1.08626	0.00285927	3.1226	0.00936965	0.254338	0.388301	0.175477	2.49836	1.00842
91500_D5	C17AU22A0015.csv		1074.1	1.54466			5.51377	0.773844	0.0728987	2.30805	1.84098	2.60825	0.181306	0.77233	0.317888	0.0517006	5.7257	0.914901		1074.1	1.54466	1.84364	1010.23	9.26388	4.66206	1060.21	5.2165	5.31356	1021.77	11.4514	11.5564	34	27.115	50.0826	68.8718	5.42876	<6.50	154.398		492502	1.22443	<0.00137	2.70762	0.00557143	0.281145	0.357936	0.256638	2.47077	0.888169
91500_D5	C17AU22A0016.csv		1054.37	1.72594	1051.36	1.70494	5.62825	0.79955	0.0769594	2.10449	1.90383	2.34335	0.177695	0.862972	0.355157	0.0549748	5.60352	0.913236		1054.37	1.72594	1.99798	1119.25	7.50053	3.78741	1082.43	4.68671	4.79451	1084.78	11.207	11.3143	34	27.115	50.0785	47.4418	5.15268	<6.58	149.344		492489	0.934266	<0.00138	2.94854	0.00368924	0.123046	0.546939	0.323371	2.27264	0.974065
91500_D5	C17AU22A0017.csv		1066.99	1.55919			5.55426	0.786496	0.0721295	2.26866	1.807	2.73739	0.180004	0.779597	0.327553	0.053823	5.85936	0.9143		1066.99	1.55919	1.85584	988.689	9.33479	4.69729	1048	5.47477	5.56734	1062.64	11.7187	11.8214	34	27.115	50.0817	44.8148	5.4803	<6.52	149.498		492600	1.05525	<0.00136	2.67725	0.00551981	0.278498	0.293343	0.254163	2.35634	0.763473
																																						135.76					2.5099		0.187629	0.383344	0.217936	2.19412	0.80068
AusZ-5	C17AU22A0069.csv		36.2779	4.8269	36.2779	4.8269	173.581	1.9909	0.060528	7.99687	0.0478763	7.86978	0.00574352	2.33646	0.241586	0.00180088	7.96412	0.837986		36.9191	4.67292	4.78008	621.541	55.5035	27.7568	47.4849	15.7396	15.772	36.4709	15.9282	16.0039	34	27.115	50.089	109.619	2.84797	9.76819	689.93		491954	3.63236	0.00534618	3.02944	0.026876	0.957366	2.15935	1.97064	14.1808	5.19711
AusZ-5	C17AU22A0070.csv		35.6253	4.19287			180.49	2.02942	0.0282897	11.737	0.0215701	11.6445	0.00554169	2.09644	0.17038	0.00153103	8.46354	0.837903		35.6253	4.19287	4.31199	7.27596e-08	#NUM!	#NUM!	21.669	23.289	23.3109	31.01	16.9271	16.9983	34	27.115	50.0931	128.483	3.17561	6.76903	686.372		491993	3.99212	0.00285945	3.10175	0.0607882	0.679302	2.13008	1.93604	14.803	5.21844
AusZ-5	C17AU22A0071.csv		38.7112	4.44825			166.017	1.95619	0.0365013	9.97142	0.0302512	9.87716	0.00602315	2.22412	0.19251	0.00162228	8.30124	0.838102		38.7112	4.44825	4.5607	7.27596e-08	7.44062e+11	3.72031e+11	30.2611	19.7543	19.7802	32.8567	16.6025	16.6751	34	27.115	50.0944	135.231	2.55029	7.74855	679.009		492005	3.80856	0.0124466	3.0363	0.0585496	0.991927	2.11808	1.71654	13.5509	5.3393
AusZ-5	C17AU22A0072.csv		38.7871	4.38947			165.574	1.96505	0.0400764	9.58251	0.033286	9.48247	0.00603501	2.19474	0.200886	0.00254827	7.20463	0.838107		38.7871	4.38947	4.50339	7.27596e-08	6.79499e+11	3.39749e+11	33.2477	18.9649	18.9919	51.5874	14.4093	14.4929	34	27.115	50.09	101.208	2.27817	7.71539	683.739		492038	4.02719	0.00776089	3.21475	0.0652092	0.819714	2.02687	1.6288	13.6976	4.87102
AusZ-5	C17AU22A0073.csv		37.2283	4.51242	37.2283	4.51242	169.294	2.03004	0.0628236	8.05136	0.0510276	7.91372	0.00591173	2.1643	0.244485	0.00197846	7.94995	0.838056		37.9971	4.32859	4.44407	701.313	48.8768	24.4441	50.5339	15.8274	15.8597	40.0635	15.8999	15.9757	34	25.405	50.0925	129.76	2.86919	<6.72	668.339		492004	3.82009	0.00321013	3.1137	0.0409066	0.958748	2.32294	1.73412	12.7008	5.12667
AusZ-5	C17AU22A0074.csv		39.7796	4.09957			161.741	1.94375	0.0334948	10.3166	0.0285188	10.2281	0.0061899	2.04979	0.185153	0.00159071	8.43346	0.838171		39.7796	4.09957	4.22132	7.27596e-08	8.10279e+11	4.05139e+11	28.5523	20.4561	20.4811	32.2179	16.8669	16.9384	34	27.115	50.0892	98.751	2.43992	<6.62	669.811		492058	3.83333	0.00288775	3.0294	0.0537093	1.03466	1.9975	1.7201	13.9512	4.76008
Mudtank_B5	C17AU22A0079.csv		695.116	3.83174	695.116	3.83174	8.71231	1.84152	0.068931	6.42769	1.0886	6.38022	0.11474	1.8972	0.275417	0.0367046	7.82355	0.884734		700.215	3.7944	3.92562	895.754	29.6141	14.8165	747.823	12.7604	12.8004	730.668	15.6471	15.7241	34	27.115	49.9942	62.8684	5.32996	<6.64	64.3124		489885	1.23938	<0.00139	0.772981	0.0384901	0.635697	0.79519	0.670455	3.8494	0.839938
Mudtank_B5	C17AU22A0080.csv		701.655	3.80117	701.655	3.80117	8.47426	1.8203	0.0831271	5.80953	1.34923	5.76355	0.117899	1.86322	0.298997	0.0292225	8.43972	0.886139		718.455	3.72643	3.85997	1271.33	17.8311	8.93124	867.225	11.5271	11.5714	583.847	16.8794	16.9509	34	27.115	49.9936	93.0673	6.65506	<6.69	64.5205		489715	1.27665	0.00540445	0.762737	0.0427996	0.560811	0.898036	0.56982	3.33306	0.930492
Mudtank_B5	C17AU22A0081.csv		721.074	4.18779			8.46293	1.9149	0.0618253	7.03515	1.00671	6.97973	0.118353	2.09389	0.262635	0.0402453	7.80759	0.886342		721.074	4.18779	4.30704	667.116	45.1501	22.5812	707.211	13.9595	13.996	799.779	15.6152	15.6923	34	27.115	49.998	106.071	5.11185	<6.57	58.6665		489793	1.17115	0.0028929	0.674625	0.0326216	0.419462	0.76278	0.562737	3.62685	0.944288
Mudtank_B5	C17AU22A0082.csv		712.128	4.01203	712.128	4.01203	8.43749	1.87017	0.0749009	6.27322	1.22183	6.22058	0.118498	1.98451	0.285695	0.0408416	7.64733	0.886406		721.909	3.96901	4.09465	1064.95	23.6889	11.8563	810.61	12.4412	12.4822	811.396	15.2947	15.3734	34	27.115	49.9978	110.333	6.66096	<6.55	62.0402		489760	1.40182	0.00290201	0.670714	0.038528	0.609435	0.983498	0.605751	3.57709	0.930397
Mudtank_B5	C17AU22A0087.csv		691.375	3.99567	691.375	3.99567	8.73502	1.93843	0.0707665	6.71141	1.11497	6.6462	0.114362	1.9731	0.277483	0.0425926	7.60934	0.884566		698.026	3.94619	4.07253	949.763	28.9193	14.4693	760.564	13.2924	13.3308	845.466	15.2187	15.2978	34	27.115	49.9977	100.395	5.12351	<6.20	59.3944		489813	1.07027	0.00770503	0.566778	0.038057	0.54878	0.911749	0.590886	3.59244	0.928031
Mudtank_B5	C17AU22A0088.csv		721.557	3.76854			8.44472	1.79832	0.0610504	6.61297	0.995966	6.57733	0.118437	1.88427	0.262409	0.0368773	7.67946	0.886379		721.557	3.76854	3.90064	640.05	44.434	22.2233	701.76	13.1547	13.1935	734.045	15.3589	15.4374	34	27.115	49.9994	92.8091	6.49189	<6.28	65.5265		489892	1.46654	0.00785713	0.78536	0.0524464	0.559637	0.930268	0.544682	3.84797	1.00659
Mudtank_B5	C17AU22A0089.csv		704.327	4.06169			8.64376	1.87394	0.0604963	6.96167	0.962789	6.912	0.115451	2.03084	0.259928	0.0359853	7.95261	0.88505		704.327	4.06169	4.18454	620.409	48.4158	24.2137	684.74	13.824	13.8609	716.599	15.9052	15.981	34	27.115	49.9981	107.878	6.55742	<6.13	63.1013		489779	1.31158	0.00771595	0.81328	0.0438589	0.656309	1.06876	0.494418	3.83982	0.976274
OG-1_D4	C17AU22A0098.csv		3460.38	0.652091	3405.95	2.48066	1.41905	0.657417	0.298232	0.727886	29.0086	1.46814	0.704629	0.64116	0.67027	0.189454	4.62749	1.14964		3438.17	1.28232	1.63015	3460.38	0.652091	0.621515	3453.81	2.93628	3.10546	3516.7	9.25497	9.3846	34	23.692	49.9834	200.542	5.09359	22.3962	647.079		488233	0.694551	0.166437	9.23637	0.122594	1.46062	3.11218	0.862691	15.639	4.55849
OG-1_D4	C17AU22A0099.csv		3466.36	0.622225			1.39825	0.620476	0.299385	0.696053	29.542	1.44482	0.71661	0.611741	0.665419	0.183916	4.62608	1.15299		3483.32	1.22348	1.58428	3466.36	0.622225	0.613813	3471.7	2.88964	3.06139	3422.11	9.25216	9.38182	34	18.149	49.9694	192.141	4.78838	40.1867	899.59		487568	0.539778	0.373009	15.0556	0.847526	8.12611	8.34981	2.19038	23.3494	5.97715
OG-1_D4	C17AU22A0100.csv		3461.33	0.582366	3434.2	2.59091	1.41246	0.665117	0.298416	0.650282	29.1722	1.45573	0.707956	0.653249	0.715036	0.186516	4.60757	1.1506		3450.74	1.3065	1.64924	3461.33	0.582366	0.603956	3459.33	2.91147	3.082	3466.58	9.21514	9.34532	34	27.116	49.9995	217.556	10.3302	39.0414	1048.11		488164	0.855992	2.29343	23.7188	2.68562	23.8858	15.2581	3.57981	34.6966	8.26801
OG-1_D4	C17AU22A0101.csv		3455.6	0.496198			1.3717	0.630283	0.297315	0.552915	29.9178	1.4267	0.729833	0.608561	0.751739	0.186461	4.5701	1.1564		3532.79	1.21712	1.57938	3455.6	0.496198	0.584404	3484.12	2.8534	3.02721	3465.64	9.14019	9.27142	34	24.061	49.9978	286.396	9.20751	56.1562	2058.92		486694	1.37478	1.0037	23.8453	1.43021	12.9947	12.0065	3.34876	53.9812	15.3212
OG-1_D4	C17AU22A0102.csv		3464.35	0.772606			1.38315	0.702194	0.298998	0.86365	29.8865	1.49808	0.723618	0.694485	0.630851	0.180997	4.78565	1.15484		3509.58	1.38897	1.71531	3464.35	0.772606	0.655138	3483.09	2.99616	3.16213	3372.08	9.57129	9.69669	34	18.148	50.0159	273.517	7.66104	22.3117	571.103		488931	0.733217	<0.00145	8.92292	0.0533583	0.723023	1.59738	0.396765	10.5498	3.29534
PLesovice_A4	C17AU22A0051.csv		341.455	1.38785	341.455	1.38785	18.3573	0.657402	0.0544831	1.88335	0.409082	2.25387	0.0544764	0.693895	0.32956	0.0166734	6.63962	0.858461		341.945	1.38779	1.71435	390.071	21.6701	10.848	348.214	4.50774	4.61972	335.18	13.2792	13.3699	34	27.115	49.9773	398.519	56.6308	59.8476	380.089		487234	4.87194	0.00736759	2.00963	0.0691664	1.30899	2.33951	0.623429	10.087	3.67959
PLesovice_A4	C17AU22A0052.csv		344.487	1.22916	344.487	1.22916	18.191	0.606827	0.0546703	1.20998	0.414211	1.7402	0.0549811	0.619504	0.448299	0.0186393	5.23167	0.858677		345.029	1.23901	1.5963	397.765	13.6345	6.83777	351.903	3.48041	3.62427	374.339	10.4633	10.5782	34	27.115	49.973	629.441	80.6371	67.725	642.581		485791	10.6327	0.0818288	3.7818	0.221688	2.59058	4.65582	1.12368	19.3907	6.36282
PLesovice_A4	C17AU22A0053.csv		346.065	1.22823	346.065	1.22823	18.1065	0.602784	0.0547127	1.25635	0.416419	1.78389	0.0552401	0.618636	0.432576	0.0191055	5.12806	0.858788		346.612	1.23727	1.59496	399.502	14.0913	7.06547	353.487	3.56779	3.70826	383.614	10.2561	10.3732	34	27.115	49.973	572.344	87.2917	284.958	686.598		485527	10.913	0.484363	6.82825	0.895465	6.08947	5.59922	2.13643	20.8618	7.17814
PLesovice_A4	C17AU22A0054.csv		341.274	1.21483			18.3902	0.606006	0.0531287	1.51348	0.397956	1.94274	0.0543666	0.607414	0.371716	0.0179654	5.22057	0.858414		341.274	1.21483	1.57761	333.285	20.5868	10.307	340.165	3.88548	4.01486	360.924	10.4411	10.5562	34	27.115	49.9754	573.583	71.5037	15.6467	756.428		486107	5.57683	0.0619293	3.3313	0.393137	4.93559	7.56711	1.54191	25.3033	7.79347
PLesovice_A4	C17AU22A0055.csv		339.238	1.27402			18.5022	0.622786	0.0526283	1.56408	0.391749	2.00025	0.0540337	0.637011	0.369933	0.0186221	5.47281	0.858272		339.238	1.27402	1.62363	311.79	22.8291	11.4268	335.646	4.00051	4.12628	373.995	10.9456	11.0554	34	27.115	49.9648	459.842	66.4921	13.1401	568.605		486505	5.5079	0.0329026	2.42136	0.20648	2.71152	4.81717	1.20599	18.3892	6.30041
Plesovice_B5	C17AU22A0075.csv		338.108	1.5421			18.5638	0.6952	0.0530742	2.2304	0.393302	2.4881	0.053849	0.771051	0.297573	0.0171668	6.02508	0.858193		338.108	1.5421	1.8415	330.959	30.5646	15.2914	336.779	4.9762	5.07786	345.015	12.0502	12.15	34	27.115	49.942	266.007	61.7661	11.7546	344.619		486909	3.69737	0.00512771	1.51832	0.0831854	0.970317	1.92316	0.618603	8.8239	3.16417
Plesovice_B5	C17AU22A0076.csv		336.313	1.44549			18.6663	0.692092	0.0531684	2.2785	0.391861	2.5544	0.0535556	0.722747	0.290637	0.0172209	6.06547	0.858068		336.313	1.44549	1.76139	334.979	30.8269	15.4225	335.728	5.10881	5.20788	346.093	12.1309	12.2301	34	27.115	49.9401	277.913	59.972	<6.44	338.431		486827	3.38853	0.0193691	1.59488	0.0782648	0.744259	1.99927	0.473207	8.36434	3.45345
Plesovice_B5	C17AU22A0077.csv		337.56	1.52157			18.5909	0.701251	0.0522507	2.38149	0.386604	2.67231	0.0537594	0.760785	0.282467	0.0160952	6.13753	0.858155		337.56	1.52157	1.82434	295.377	36.7993	18.4072	331.886	5.34461	5.43939	323.65	12.2751	12.3731	34	27.115	49.9396	280.175	61.3083	9.39466	340.372		486777	3.53592	0.00998813	1.51425	0.0732924	1.24912	2.04709	0.541312	8.70468	3.12264
Plesovice_B5	C17AU22A0078.csv		339.493	1.3957			18.4865	0.689691	0.0528918	2.22629	0.393642	2.46093	0.0540755	0.697851	0.295919	0.0159228	6.14857	0.85829		339.493	1.3957	1.72077	323.144	31.2895	15.6537	337.027	4.92186	5.02462	320.21	12.2971	12.395	34	27.115	49.9347	268.656	62.2934	<6.48	343.183		486699	3.62578	0.0052077	1.60083	0.0638074	0.82854	1.89391	0.452951	8.18866	3.35549
QingHu_A4	C17AU22A0056.csv		159.866	1.3828	159.866	1.3828	39.8128	0.679622	0.0494997	2.03765	0.171242	2.41894	0.0251171	0.685493	0.316398	0.00802018	4.80885	0.846042		159.915	1.37099	1.70078	170.524	55.7886	27.8993	160.496	4.83788	4.94239	161.92	9.6177	9.7425	34	27.115	49.9231	197.969	8.36228	<6.69	1261.2		486133	4.46748	0.0189358	14.3689	0.174952	2.60347	6.06706	0.677647	30.612	9.46139
QingHu_A4	C17AU22A0057.csv		160.094	1.52547	160.094	1.52547	39.6702	0.724678	0.0508778	2.56309	0.176386	2.88044	0.0251967	0.751326	0.272071	0.00814679	4.92763	0.846075		160.415	1.50265	1.80859	234.268	50.4893	25.2502	164.946	5.76088	5.84892	164.465	9.85526	9.97709	34	25.891	49.9519	169.738	9.33454	<6.80	1100.12		487228	3.09557	0.022341	10.8267	0.211928	3.36434	5.61418	0.7987	25.3479	8.59502
QingHu_A4	C17AU22A0058.csv		163.677	1.56102	163.677	1.56102	38.7046	0.717629	0.0528166	2.21441	0.187864	2.47719	0.0258283	0.773135	0.308288	0.00798324	4.99402	0.846339		164.386	1.54627	1.84499	319.912	31.4551	15.7364	174.805	4.95437	5.05647	161.177	9.98804	10.1083	34	27.115	49.9302	200.856	9.55669	<6.68	607.274		486958	9.31606	0.351653	17.963	0.311345	2.16974	1.83473	0.352717	10.8884	3.63784
QingHu_A4	C17AU22A0059.csv		161.125	1.19797	161.125	1.19797	39.4435	0.606895	0.0505654	1.32974	0.176498	1.81694	0.0253504	0.598003	0.415202	0.00839554	4.67538	0.846139		161.381	1.19601	1.56316	220.036	27.9605	13.9903	165.043	3.63387	3.77189	169.466	9.35077	9.47908	34	27.115	49.8502	250.281	7.78841	11.655	1122.26		484199	15.3703	0.0165744	26.6818	0.152636	2.1919	4.34901	0.37532	22.7333	7.76382
QingHu_A4	C17AU22A0060.csv		156.445	1.37047	156.445	1.37047	40.5079	0.67892	0.0529994	2.0498	0.180112	2.39754	0.0246838	0.677005	0.314415	0.00798109	4.85032	0.84586		157.189	1.35401	1.68713	327.759	28.3801	14.1999	168.157	4.79507	4.90049	161.134	9.70065	9.82439	34	27.115	49.9445	234.837	12.3341	17.7305	1056.26		486789	9.9383	0.224341	16.4625	0.308295	2.44631	4.83095	0.769243	22.1092	7.33838
Temora_A1	C17AU22A0090.csv		417.49	2.01814	417.49	2.01814	14.9215	0.887567	0.0558822	3.43587	0.515769	3.57121	0.0669686	1.00143	0.250113	0.0203943	5.71016	0.863822		417.865	2.00285	2.24153	446.7	34.1826	17.0995	422.321	7.14243	7.21362	409.23	11.4203	11.5256	34	27.115	50.0094	174.312	8.14904	<6.06	624.975		489227	0.482967	0.00284945	3.41337	0.047355	0.466414	1.33838	0.288845	9.37651	3.22691
Temora_A1	C17AU22A0091.csv		418.843	1.50885	418.843	1.50885	14.8821	0.734162	0.0560056	2.42298	0.518672	2.62015	0.0672003	0.750993	0.28998	0.0206925	5.46701	0.863922		419.265	1.50199	1.80804	451.601	23.8238	11.9236	424.264	5.2403	5.33693	415.154	10.934	11.0439	34	27.115	50.0143	240.585	9.0451	<5.97	1033.32		488637	1.15305	0.00757227	5.29096	0.0449259	1.14125	2.11349	0.429521	13.694	4.83794
Temora_A1	C17AU22A0092.csv		411.854	1.97706	411.854	1.97706	15.0949	0.983119	0.05786	3.41605	0.528131	3.56636	0.0662088	0.977741	0.276568	0.0202701	5.49371	0.863495		413.273	1.95548	2.19931	523.486	28.6201	14.3198	430.568	7.13271	7.204	406.764	10.9874	11.0968	34	27.115	50.0268	185.355	12.116	<6.05	1474.11		488757	0.476017	0.0245689	3.27984	0.209425	3.89183	6.1855	1.14198	32.3425	10.646
Temora_A1	C17AU22A0093.csv		399.499	1.96294	399.499	1.96294	15.5595	0.958569	0.05898	4.17004	0.522618	4.2805	0.0642743	0.952367	0.224028	0.0204298	5.53274	0.862662		401.566	1.90473	2.15431	565.387	32.1187	16.0681	426.899	8.56099	8.62048	409.936	11.0655	11.1741	34	27.115	50.0434	230.86	16.0164	152.454	2025.61		488086	0.597067	0.0592174	4.64669	0.309783	4.86525	9.48047	2.18084	54.6469	16.7021
Temora_A4	C17AU22A0065.csv		416.565	1.62148			14.9787	0.801515	0.0517679	3.35373	0.475592	3.57289	0.0667535	0.810742	0.232446	0.0192902	5.65899	0.863729		416.565	1.62148	1.90847	274.15	56.0479	28.029	395.044	7.14578	7.21695	387.285	11.318	11.4242	34	27.115	50.0174	194.889	7.87402	<6.42	654.423		489353	0.622547	<0.00133	4.00512	0.0517053	0.711878	2.42911	0.468641	11.9557	3.59143
Temora_A4	C17AU22A0066.csv		420.977	1.68238	420.977	1.68238	14.8055	0.816782	0.0557751	3.08426	0.518349	3.2946	0.0675302	0.831318	0.255998	0.0230745	6.5147	0.864064		421.258	1.66264	1.94356	442.435	31.0033	15.5107	424.048	6.58919	6.6663	462.403	13.0294	13.1218	34	27.115	50.0084	243.346	6.9299	<6.39	698.318		488785	0.677883	<0.00133	4.00969	0.0165448	0.532168	1.12023	0.288509	9.27086	3.68582
Temora_A4	C17AU22A0067.csv		423.794	2.43133			14.7146	1.1171	0.0514754	4.26428	0.481338	4.35949	0.0679503	1.21566	0.253415	0.0223975	6.61688	0.864245		423.794	2.43133	2.63143	261.151	74.9879	37.4977	398.991	8.71898	8.7774	448.984	13.2338	13.3247	34	27.115	50.0444	202.343	11.7369	<6.33	597.893		490151	0.457106	<0.00133	2.39557	0.0349489	1.25011	2.06612	0.436209	12.278	4.09422
Temora_A4	C17AU22A0068.csv		412.357	2.06101			15.1374	0.975113	0.0507172	3.59328	0.461009	3.73812	0.0660572	1.03051	0.261899	0.0211407	5.45334	0.86343		412.357	2.06101	2.29365	226.966	73.1569	36.5823	384.96	7.47624	7.54428	424.053	10.9067	11.0169	34	27.115	50.0302	195.648	12.4824	<6.47	1456.95		488827	0.507712	0.0268187	3.31762	0.23431	2.99115	5.88493	1.25643	32.9384	10.9378
Temora_D1	C17AU22A0094.csv		416.228	2.13434			14.9936	1.00562	0.0531378	3.66446	0.488702	3.80026	0.0666976	1.06717	0.264641	0.0179699	6.26589	0.863705		416.228	2.13434	2.35976	333.674	49.7837	24.8975	404.025	7.60052	7.66747	361.014	12.5318	12.6278	34	27.115	50.0215	192.112	10.8913	<6.04	1351.84		488691	0.433207	0.0100297	3.21256	0.223279	3.94657	5.51124	1.2243	33.5666	10.012
Temora_D1	C17AU22A0095.csv		412.907	1.76114	412.907	1.76114	15.1007	0.802859	0.0550916	2.57589	0.502799	2.81963	0.0661541	0.880677	0.297563	0.0200867	5.39666	0.863471		412.943	1.76135	2.02865	414.947	27.7408	13.8805	413.596	5.63925	5.72916	403.119	10.7933	10.9047	34	27.115	49.999	181.337	6.80102	<6.04	1375.67		488079	0.565087	0.0171417	4.66859	0.214733	3.00944	6.34678	0.93782	24.4913	8.47484
Temora_D1	C17AU22A0096.csv		409.049	1.76031	409.049	1.76031	15.0989	0.863949	0.0635754	3.30307	0.580779	3.41601	0.0662188	0.858086	0.253047	0.0197323	5.61716	0.863499		413.333	1.71617	1.98955	726.59	19.2744	9.65172	464.962	6.83202	6.90642	396.077	11.2343	11.3414	34	27.115	50.0141	174.781	8.74821	256.356	1414.16		487923	0.417215	0.110706	5.50987	0.278245	3.73575	5.67493	1.12023	28.4631	9.03991
Temora_D1	C17AU22A0097.csv		417.118	1.79453	417.118	1.79453	14.9569	0.858462	0.0555387	3.36055	0.512444	3.53781	0.0668793	0.885577	0.247505	0.0199203	5.51931	0.863784		417.326	1.77115	2.03716	432.98	34.575	17.2956	420.092	7.07562	7.14748	399.814	11.0386	11.1475	34	27.368	49.9972	137.95	7.24007	<6.08	1232.07		488378	0.631289	0.0501721	4.10966	0.207626	3.30111	5.06621	0.947827	26.5273	8.03994
Temora_D3	C17AU22A0005.csv		423.189	2.18368	423.189	2.18368	14.6578	1.00598	0.0595809	3.47959	0.568501	3.62237	0.0682133	1.08371	0.277736	0.0260692	5.96617	0.864359		425.381	2.16742	2.38972	587.421	25.6998	12.8608	457.045	7.24475	7.31495	521.648	11.9323	12.0332	34	27.115	50.0268	192.786	6.62713	<6.20	429.801		489868	0.614306	<0.00138	2.76837	0.0189914	0.229464	1.16526	0.127939	5.90933	2.25201
Temora_D3	C17AU22A0006.csv		419.455	2.06711			14.8769	0.997193	0.0510546	3.6982	0.47987	3.83455	0.0672317	1.03356	0.260344	0.0226912	6.04784	0.863936		419.455	2.06711	2.29913	242.268	70.3419	35.1749	397.984	7.66911	7.73546	454.807	12.0957	12.1951	34	27.115	50.027	235.74	10.84	<6.35	725.956		489325	0.75233	<0.0014	3.19375	0.0386133	0.798494	2.12286	0.401723	11.7844	4.32527
Temora_D3	C17AU22A0007.csv		410.738	1.75765	410.738	1.75765	15.1808	0.833086	0.0553499	3.68805	0.509242	3.83885	0.0658208	0.859792	0.220336	0.0206793	5.5051	0.863328		410.927	1.71958	1.99249	425.389	38.6727	19.3436	417.94	7.6777	7.74398	414.891	11.0102	11.1194	34	27.115	50.0034	205.939	6.43267	<6.29	778.005		488729	0.787066	0.00285976	3.7226	0.0740736	1.07508	1.8381	0.378172	13.2006	4.46968
Temora_D3	C17AU22A0008.csv		415.221	1.82952	415.221	1.82952	14.9914	0.844644	0.0571742	3.62293	0.532733	3.70703	0.0667041	0.896908	0.227049	0.0199254	5.51503	0.863708		416.267	1.79382	2.0569	497.277	32.0966	16.057	433.622	7.41406	7.48268	399.914	11.0301	11.139	34	27.115	50.0126	190.198	8.96559	<6.37	620.825		489256	0.703094	0.00287321	3.93335	0.0495686	0.920517	2.09535	0.363631	10.0013	3.53974
Temora_D3	C17AU22A0009.csv		421.512	1.89989			14.8036	0.870029	0.0547688	4.14825	0.516696	4.27247	0.0675724	0.949944	0.205268	0.0217132	6.57295	0.864082		421.512	1.89989	2.15003	401.799	46.2422	23.1272	422.942	8.54494	8.60454	435.413	13.1459	13.2375	34	27.115	50.0224	238.619	7.46921	<6.31	760.218		489158	0.693849	0.00761969	3.32888	0.0677447	1.19615	1.85275	0.414687	12.2876	4.50493
Temora_D3	C17AU22A0010.csv		414.156	1.90514	414.156	1.90514	15.048	0.928003	0.0557814	4.41728	0.517145	4.51453	0.0664149	0.92235	0.205596	0.0210469	6.14952	0.863584		414.519	1.8447	2.10142	442.684	44.376	22.1943	423.243	9.02906	9.08549	422.191	12.299	12.3969	34	27.115	50.0115	190.317	9.36081	<6.43	1381.27		488377	0.576872	0.00531134	3.59423	0.208728	3.45307	4.83585	1.12197	28.6827	9.26859
Calibraiton standard for Pb isotopes & TE:
NIST610	C17AU22A0001.csv						4.27701	0.741668	0.910157	0.361132	90.5379	1.45972	0.233786	0.750583	0.899082	0.51901	4.54531	0.939435														34	27.115		436.73	460.337	462.717	467.506		448	471.018	445.839	454.938	453.868	433.236	455.134	449.041	454.218	442.686
NIST610	C17AU22A0002.csv						4.27828	0.825401	0.910538	0.361132	90.4782	1.46957	0.233801	0.832471	0.916149	0.525674	4.54811	0.939442														34	27.115		389.908	443.711	455.105	457.157		448	457.881	434.053	450.059	440.705	426.076	452.833	446.369	442.586	431.225
NIST610	C17AU22A0018.csv						4.27533	0.81787	0.904508	0.361132	89.3171	1.47977	0.233922	0.819293	0.914791	0.52394	4.54503	0.939499														34	27.115		420.666	450.342	453.626	462.421		448	466.196	441.551	451.044	450.608	432.129	451.682	446.05	448.356	435.636
NIST610	C17AU22A0019.csv						4.29159	0.838895	0.91318	0.361132	89.7941	1.47286	0.233033	0.850779	0.918507	0.52456	4.54197	0.939079														34	27.115		391.339	449.542	454.287	456.528		448	463.308	434.879	454.774	445.748	427.75	446.935	441.648	448.567	434.981
NIST610	C17AU22A0041.csv						4.27112	0.815293	0.909159	0.361132	89.2223	1.46043	0.234172	0.815225	0.914319	0.52128	4.53613	0.939617														34	27.115		427.66	452.824	459.175	459.675		448	462.078	437.869	447.71	442.795	419.993	446.212	444.35	446.25	431.723
NIST610	C17AU22A0042.csv						4.29942	0.782663	0.911654	0.361132	88.855	1.47429	0.232628	0.786529	0.908002	0.525827	4.55007	0.938887														34	27.115		430.593	463.649	473.613	477.395		448	476.186	455.179	468.294	460.619	445.364	474.755	464.525	464.749	455.491
NIST610	C17AU22A0061.csv						4.25665	0.789747	0.915865	0.361132	89.8976	1.50882	0.234992	0.802344	0.909429	0.518146	4.53737	0.940005														34	27.115		406.061	441.204	454.029	449.849		448	456.963	429.318	440.471	440.902	415.875	443.93	433.069	434.835	425.101
NIST610	C17AU22A0062.csv						4.26725	0.761338	0.904743	0.361132	88.573	1.51586	0.23439	0.766432	0.903509	0.518092	4.53336	0.939721														34	27.115		392.665	449.472	445.529	460.332		448	460.629	434.499	448.207	442.814	436.276	447.079	444.813	442.486	431.912
NIST610	C17AU22A0083.csv						4.27598	0.818571	0.907295	0.361132	88.6636	1.4832	0.23395	0.825796	0.914919	0.506336	4.54194	0.939512														34	27.115		434.368	450.441	460.65	465.001		448	468.044	443.954	456.869	455.147	434.568	462.438	450.341	456.142	440.473
NIST610	C17AU22A0084.csv						4.27575	0.786411	0.911191	0.361132	89.0482	1.48164	0.233925	0.792437	0.908761	0.506686	4.53711	0.939501														34	27.115		399.076	459.901	462.547	465.702		448	469.771	444.93	460.539	448.735	429.745	450.366	451.303	455.275	443.268
NIST610	C17AU22A0105.csv						4.28088	0.804778	0.908594	0.361132	89.0635	1.51207	0.233624	0.814326	0.912353	0.49147	4.5424	0.939358														34	27.115		439.743	449.392	457.767	456.608		448	459.475	436.557	451.465	444.897	428.975	447.62	447.514	442.776	430.063
NIST610	C17AU22A0106.csv						4.30366	0.796862	0.911484	0.361132	88.8991	1.484	0.232376	0.805305	0.91083	0.487838	4.54569	0.938768														34	27.115		387.195	453.187	456.956	465.83		448	468.452	441.377	451.634	449.165	430.015	457.021	444.984	451.769	441.447
Weighted Averages:
91500			1060.38	Wtd Mean (from internal errs)					0.0750433	Wtd Mean (from internal errs)			0.178793	Wtd Mean (from internal errs)						1060.38	Wtd Mean (from internal errs)		1068.72	Wtd Mean (from internal errs)		1067.47	Wtd Mean (from internal errs)		1092.01	Wtd Mean (from internal errs)
			3.12584	2-sigma err. of mean					0.000671543	2-sigma err. of mean			0.000527058	2-sigma err. of mean						3.12584	2-sigma err. of mean		15.3164	2-sigma err. of mean		10.6041	2-sigma err. of mean		21.9541	2-sigma err. of mean
			0.951576	MSWD					1.29713	MSWD			1.11917	MSWD						0.951576	MSWD		1.03691	MSWD		0.328246	MSWD		0.618887	MSWD
			0	rejected					0	rejected			0	rejected						0	rejected		0	rejected		0	rejected		0	rejected
			0.543269	Probability of fit					0.124348	Probability of fit			0.296072	Probability of fit						0.543269	Probability of fit		0.404845	Probability of fit		0.999848	Probability of fit		0.951697	Probability of fit
AusZ-2			37.6713	Wtd Mean (from internal errs)					0.0397556	Wtd Mean (from internal errs)			0.00589466	Wtd Mean (from internal errs)						37.8879	Wtd Mean (from internal errs)					32.2765	Wtd Mean (from internal errs)		35.8943	Wtd Mean (from internal errs)
			1.74597	95%-conf. err. of mean					0.0135166	95%-conf. err. of mean			0.00025492	95%-conf. err. of mean						1.63369	95%-conf. err. of mean					11.0383	95%-conf. err. of mean		6.99907	95%-conf. err. of mean
			4.03552	MSWD					11.0459	MSWD			3.59491	MSWD						3.57385	MSWD					11.4508	MSWD		5.22312	MSWD
			0	rejected					0	rejected			0	rejected						0	rejected					0	rejected		0	rejected
			0.00115735	Probability of fit					1.17092e-10	Probability of fit			0.00297847	Probability of fit						0.0031148	Probability of fit					4.48227e-11	Probability of fit		8.47452e-05	Probability of fit
Mudtank			706.268	Wtd Mean (from internal errs)					0.0678741	Wtd Mean (from internal errs)			0.116768	Wtd Mean (from internal errs)						711.941	Wtd Mean (from internal errs)		915.83	Wtd Mean (from internal errs)		751.559	Wtd Mean (from internal errs)		731.95	Wtd Mean (from internal errs)
			10.5282	2-sigma err. of mean					0.00760135	95%-conf. err. of mean			0.00172708	2-sigma err. of mean						10.53	2-sigma err. of mean		235.981	95%-conf. err. of mean		36.8204	2-sigma err. of mean		84.5761	95%-conf. err. of mean
			0.732717	MSWD					3.41657	MSWD			0.682459	MSWD						0.611718	MSWD		3.61271	MSWD		1.78813	MSWD		2.50682	MSWD
			0	rejected					0	rejected			0	rejected						0	rejected		0	rejected		0	rejected		0	rejected
			0.62321	Probability of fit					0.00225566	Probability of fit			0.663855	Probability of fit						0.72119	Probability of fit		0.00138574	Probability of fit		0.0971303	Probability of fit		0.0199408	Probability of fit
OG-1			3460.77	Wtd Mean (from internal errs)					0.298305	Wtd Mean (from internal errs)			0.716426	Wtd Mean (from internal errs)						3482.74	Wtd Mean (from internal errs)		3460.77	Wtd Mean (from internal errs)		3470.35	Wtd Mean (from internal errs)		3448.4	Wtd Mean (from internal errs)
			9.37747	2-sigma err. of mean					0.00180477	2-sigma err. of mean			0.0131417	95%-conf. err. of mean						49.3578	95%-conf. err. of mean		9.37747	2-sigma err. of mean		45.2597	2-sigma err. of mean		143.178	2-sigma err. of mean
			0.177055	MSWD					0.177059	MSWD			5.33383	MSWD						3.18402	MSWD		0.177055	MSWD		0.0728245	MSWD		0.113059	MSWD
			0	rejected					0	rejected			0	rejected						0	rejected		0	rejected		0	rejected		0	rejected
			0.950311	Probability of fit					0.95031	Probability of fit			0.000271695	Probability of fit						0.0126401	Probability of fit		0.950311	Probability of fit		0.990369	Probability of fit		0.977981	Probability of fit
Plesovice			340.801	Wtd Mean (from internal errs)					0.053728	Wtd Mean (from internal errs)			0.0543167	Wtd Mean (from internal errs)						340.969	Wtd Mean (from internal errs)		360.04	Wtd Mean (from internal errs)		342.656	Wtd Mean (from internal errs)		352.008	Wtd Mean (from internal errs)
			2.50461	95%-conf. err. of mean					0.000599329	2-sigma err. of mean			0.000437654	95%-conf. err. of mean						2.67594	95%-conf. err. of mean		25.1637	2-sigma err. of mean		4.87629	2-sigma err. of mean		13.4499	2-sigma err. of mean
			2.02391	MSWD					1.17444	MSWD			2.42294	MSWD						2.29865	MSWD		1.17082	MSWD		1.25551	MSWD		1.33377	MSWD
			0	rejected					0	rejected			0	rejected						0	rejected		0	rejected		0	rejected		0	rejected
			0.0397231	Probability of fit					0.310035	Probability of fit			0.0129379	Probability of fit						0.0184905	Probability of fit		0.312325	Probability of fit		0.261948	Probability of fit		0.221098	Probability of fit
QingHu			160.079	Wtd Mean (from internal errs)					0.0510959	Wtd Mean (from internal errs)			0.0252056	Wtd Mean (from internal errs)						160.471	Wtd Mean (from internal errs)		247.076	Wtd Mean (from internal errs)		166.249	Wtd Mean (from internal errs)		163.614	Wtd Mean (from internal errs)
			3.13492	95%-conf. err. of mean					0.00086377	2-sigma err. of mean			0.00048962	95%-conf. err. of mean						3.07869	95%-conf. err. of mean		38.9103	2-sigma err. of mean		3.44671	2-sigma err. of mean		7.09528	2-sigma err. of mean
			5.15779	MSWD					2.09738	MSWD			5.16352	MSWD						5.03683	MSWD		2.12868	MSWD		1.6402	MSWD		0.199082	MSWD
			0	rejected					0	rejected			0	rejected						0	rejected		0	rejected		0	rejected		0	rejected
			0.000374697	Probability of fit					0.0783076	Probability of fit			0.000370798	Probability of fit						0.000467038	Probability of fit		0.0744425	Probability of fit		0.160999	Probability of fit		0.93894	Probability of fit
Temora			415.322	Wtd Mean (from internal errs)					0.0553242	Wtd Mean (from internal errs)			0.0666593	Wtd Mean (from internal errs)						415.998	Wtd Mean (from internal errs)		437.96	Wtd Mean (from internal errs)		419.171	Wtd Mean (from internal errs)		414.37	Wtd Mean (from internal errs)
			2.81618	95%-conf. err. of mean					0.00152813	95%-conf. err. of mean			0.000432179	95%-conf. err. of mean						2.61188	95%-conf. err. of mean		62.3706	95%-conf. err. of mean		9.70127	95%-conf. err. of mean		15.3188	95%-conf. err. of mean
			2.12011	MSWD					2.64017	MSWD			1.98021	MSWD						1.85709	MSWD		2.72215	MSWD		1.6827	MSWD		1.63839	MSWD
			0	rejected					0	rejected			0	rejected						0	rejected		0	rejected		0	rejected		0	rejected
			0.00452793	Probability of fit					0.000253478	Probability of fit			0.00927625	Probability of fit						0.0170059	Probability of fit		0.000156804	Probability of fit		0.038337	Probability of fit		0.0466895	Probability of fit
[truncated: 173 more columns]

## Sheet: TOF_Exp2_IndividualSessions
Analysis	Source Filename	Comment	Preferred Age	Preferred Age	207 corr 206Pb/238U	207 corr 206Pb/238U	238U/206Pb	238U/206Pb	207Pb/206Pb	207Pb/206Pb	207Pb/235U(calc)	207Pb/235U(calc)	206Pb/238U	206Pb/238U	Rho	208Pb/232Th	208Pb/232Th	CommPb at 206Pb/238U Age		206Pb/238U Age (Ma)	206Pb/238U Age (Ma)	206Pb/238U Age (Ma)	207Pb/206Pb Age (Ma)	207Pb/206Pb Age (Ma)	207Pb/206Pb Age (Ma)	207Pb/235U(calc) Age (Ma)	207Pb/235U(calc) Age (Ma)	207Pb/235U(calc) Age (Ma)	208Pb/232Th Age (Ma)	208Pb/232Th Age (Ma)	208Pb/232Th Age (Ma)	Spot Size (µm)	Time (s)	29Si	31P	49Ti	56Fe	89Y	90Zr	91Zr	93Nb	139La	140Ce	141Pr	146Nd	147Sm	153Eu	157Gd	159Tb
			Ma	2s%	Age	2s%	ratio	1s%	ratio	1s%	ratio	1s%	ratio	1s%		ratio	1s%			Age	2s%	2s_sys%	Age	2s%	2s_sys%	Age	2s%	2_sys%	Age	2s%	2s_sys%			ppm	ppm	ppm	ppm	ppm	ppm	ppm	ppm	ppm	ppm	ppm	ppm	ppm	ppm	ppm	ppm
Calibraiton standard for Pb/U and Pb/Th
91500	T17AP12A03.csv				1063.47	1.5396	5.56135	0.765233	0.0769857	2.59261	1.8975	2.08698	0.179825	0.762358	0.283085	0.0532979	1.61039	0.914217		1066.01	1.52472	1.82697	1119.93	9.23368	9.24883	1080.21	4.17395	4.29465	1052.54	3.22079	3.57626	34	26.449	154965	<90.1	<9.04	<3.91	155.802	506224	492575	<0.166	<0.0263	2.85563	0.09503	0.20894	0.50444	0.19615	2.0975	0.87023
91500	T17AP12A04.csv						5.6062	0.765233	0.0736022	2.93224	1.80056	2.08698	0.178373	0.762358	0.252515	0.054335	1.61039	0.913548		1058.08	1.52472	1.82697	1029.68	11.5129	11.5251	1045.66	4.17395	4.29465	1072.48	3.22079	3.57626	34	26.449	154852	<92.3	<8.74	<3.83	158.48	504211	492577	0.77598	<0.022	2.78801	0.09082	0.33087	0.4867	0.28569	2.46113	0.89811
91500	T17AP12A13.csv						5.55136	0.765233	0.0735517	2.77589	1.83264	2.08698	0.180119	0.762358	0.265758	0.0536503	1.61039	0.914353		1067.62	1.52472	1.82697	1028.29	10.916	10.9289	1057.23	4.17395	4.29465	1059.31	3.22079	3.57626	34	26.449	152347	<100	<9.24	<3.91	153.678	496955	492635	<0.172	<0.0284	2.75191	0.08576	0.20472	0.52079	0.24688	2.42713	0.86556
91500	T17AP12A14.csv				1069.59	1.55292	5.53909	0.765233	0.0752349	2.90879	1.88102	2.08698	0.180521	0.762358	0.254419	0.0543139	1.61039	0.914539		1069.82	1.52472	1.82697	1073.89	10.8781	10.891	1074.42	4.17395	4.29465	1072.08	3.22079	3.57626	34	26.449	152823	<101	<9.32	<3.96	149.692	496495	492613	0.90277	0.03147	2.62435	0.05465	0.17354	0.47961	0.27645	2.34494	0.8729
91500	T17AP12A22.csv				1054.18	1.56409	5.61801	0.765233	0.0760594	3.0582	1.89352	2.08698	0.177998	0.762358	0.242739	0.0519564	1.61039	0.913375		1056.02	1.52472	1.82697	1095.74	11.1723	11.1848	1078.82	4.17395	4.29465	1026.7	3.22079	3.57626	34	26.449	155291	<91.6	10.1498	5.34151	134.617	498744	492887	0.24833	<0.0356	2.50242	0.06758	0.30526	0.43212	0.19557	2.08597	0.72575
91500	T17AP12A23.csv						5.60042	0.765233	0.0723816	2.965	1.80969	2.08698	0.178557	0.762358	0.2499	0.0551812	1.61039	0.913633		1059.08	1.52472	1.82697	995.784	12.0999	12.1115	1048.97	4.17395	4.29465	1088.74	3.22079	3.57626	34	26.449	153743	<91.0	<8.08	<3.65	131.762	500434	492883	0.45707	<0.0351	2.45284	0.07264	0.12798	0.37905	0.22092	2.09866	0.70617
91500	T17AP12A36.csv						5.57811	0.765233	0.0717877	3.04175	1.81488	2.08698	0.179259	0.762358	0.243974	0.0542824	1.61039	0.913957		1062.92	1.52472	1.82697	979.02	12.6581	12.6691	1050.84	4.17395	4.29465	1071.47	3.22079	3.57626	34	26.449	156091	<74.5	<8.75	<3.77	135.627	508250	492738	<0.188	<0.0232	2.52443	0.08225	0.19968	0.29343	<0.225	2.23044	0.77107
91500	T17AP12A37.csv						5.52924	0.765233	0.0742902	2.8915	1.89415	2.08698	0.180842	0.762358	0.255841	0.0535563	1.61039	0.914687		1071.57	1.52472	1.82697	1048.46	11.118	11.1306	1079.04	4.17395	4.29465	1057.51	3.22079	3.57626	34	26.449	155736	<72.8	<8.85	<3.75	138.427	509182	492746	1.65299	0.03598	2.54081	0.08669	0.14058	0.37585	0.26531	2.12175	0.82078
91500	T17AP12A48.csv				1050.21	1.57038	5.64982	0.765233	0.0745053	3.23068	1.82996	2.08698	0.176975	0.762358	0.230487	0.0533581	1.61039	0.912904		1050.42	1.52472	1.82697	1054.29	12.3427	12.3541	1056.26	4.17395	4.29465	1053.69	3.22079	3.57626	34	26.449	156272	<80.6	7.74082	<3.56	120.819	502416	492558	<0.315	<0.0201	2.37347	0.03076	0.13145	0.59246	<0.4	1.66621	0.66425
91500	T17AP12A49.csv						5.51865	0.765233	0.0746209	2.77648	1.87109	2.08698	0.181182	0.762358	0.265705	0.0541751	1.61039	0.914844		1073.43	1.52472	1.82697	1057.41	10.5712	10.5845	1070.92	4.17395	4.29465	1069.41	3.22079	3.57626	34	26.449	157094	<83.8	<6.99	<3.50	144.169	501300	492967	0.66128	0.0303	2.66296	0.05541	0.26422	0.37208	<0.409	2.18905	0.83775
91500	T17MA21A003.csv				1062.67	0.983711	5.56634	0.489289	0.0765622	2.11245	1.86424	1.36418	0.179593	0.47241	0.225648	0.0520448	2.17647	0.914111		1064.75	0.94482	1.38048	1108.92	7.61066	7.62903	1068.49	2.72835	2.90964	1028.41	4.35293	4.62214	30	27.136	145393	<57.7	5.85005	<7.73	193.453	492912	508421	16.1907	<0.0102	3.04307	0.08819	0.37819	0.7815	0.31911	3.25748	1.12324
91500	T17MA21A004.csv				1061.32	0.973631	5.58039	0.489289	0.0758	1.97715	1.84171	1.36418	0.179193	0.47241	0.240225	0.0557189	2.17647	0.913926		1062.56	0.94482	1.38048	1088.9	7.27577	7.29499	1060.47	2.72835	2.90964	1099.07	4.35293	4.62214	30	27.136	150022	<59.4	5.46092	<7.84	189.976	492872	507346	17.6216	0.03953	2.84892	0.08703	0.32517	0.68322	0.31587	2.86293	1.12103
91500	T17MA21A016.csv				1069.26	0.981556	5.54728	0.489289	0.0755175	2.11339	1.85707	1.36418	0.180524	0.47241	0.225553	0.0538528	2.17647	0.91454		1069.83	0.94482	1.38048	1081.41	7.83971	7.85754	1065.94	2.72835	2.90964	1063.21	4.35293	4.62214	30	27.136	155957	<58.0	<4.84	11.7835	187.022	492826	500621	16.3984	<0.0108	2.86937	0.0773	0.28304	0.5949	0.3035	2.90415	1.10966
91500	T17MA21A017.csv				1053.49	0.984974	5.63008	0.489289	0.0760167	2.1447	1.84301	1.36418	0.177869	0.47241	0.222424	0.053689	2.17647	0.913316		1055.32	0.94482	1.38048	1094.62	7.84443	7.86226	1060.94	2.72835	2.90964	1060.06	4.35293	4.62214	30	27.136	153386	<57.0	6.06669	10.6357	196.18	492826	498620	19.3916	<0.0108	3.01778	0.0523	0.32268	0.6617	0.33758	3.0019	1.11069
91500	T17MA21A035.csv						5.58812	0.489289	0.0734475	2.48284	1.81717	1.36418	0.178875	0.47241	0.19335	0.0542702	2.17647	0.91378		1060.82	0.94482	1.38048	1025.42	9.7952	9.80948	1051.67	2.72835	2.90964	1071.24	4.35293	4.62214	30	27.136	150815	<48.7	4.8943	<7.06	145.126	493227	482804	13.1379	0.01318	2.30533	0.04419	0.26757	0.33264	0.2455	2.28267	0.81248
91500	T17MA21A036.csv				1068.81	0.994753	5.53562	0.489289	0.0759905	2.29364	1.89922	1.36418	0.180547	0.47241	0.20863	0.0531914	2.17647	0.914551		1069.96	0.94482	1.38048	1093.93	8.39537	8.41203	1080.81	2.72835	2.90964	1050.48	4.35293	4.62214	30	27.136	154546	<48.6	8.89026	<7.02	151.92	493294	482324	15.0958	<0.0109	2.33939	0.04886	0.16533	0.42184	0.23644	2.30675	0.78569
91500	T17MA21A050.csv						5.57439	0.489289	0.0733198	2.1645	1.83446	1.36418	0.179056	0.47241	0.220489	0.052512	2.17647	0.913863		1061.81	0.94482	1.38048	1021.9	8.57329	8.58961	1057.88	2.72835	2.90964	1037.41	4.35293	4.62214	30	27.136	149707	<38.4	4.76722	<6.36	177.479	493180	484318	15.5015	<0.0103	2.94284	0.03987	0.28323	0.70538	0.29994	2.76446	1.06875
91500	T17MA21A051.csv						5.57335	0.489289	0.0744652	2.20423	1.86422	1.36418	0.179088	0.47241	0.216703	0.0552167	2.17647	0.913878		1061.99	0.94482	1.38048	1053.2	8.43125	8.44784	1068.48	2.72835	2.90964	1089.43	4.35293	4.62214	30	27.136	144465	<38.8	<2.95	<6.47	184.703	493131	483502	16.6381	<0.0105	2.822	0.03535	0.29616	0.6437	0.34185	3.11696	1.03229
91500	T17MA21A067.csv						5.55549	0.489289	0.0725726	2.35244	1.82467	1.36418	0.18015	0.47241	0.203634	0.0546149	2.17647	0.914368		1067.79	0.94482	1.38048	1001.14	9.54101	9.55567	1054.36	2.72835	2.90964	1077.86	4.35293	4.62214	30	27.136	152073	<41.5	<6.35	<6.86	133.963	493113	512212	18.8683	<0.011	2.16445	0.04182	0.21968	0.50971	0.24981	2.30411	0.8045
91500	T17MA21A068.csv				1059.32	0.986559	5.60118	0.489289	0.0753839	2.19015	1.87924	1.36418	0.178755	0.47241	0.218029	0.0529959	2.17647	0.913724		1060.17	0.94482	1.38048	1077.86	8.15557	8.17271	1073.79	2.72835	2.90964	1046.72	4.35293	4.62214	30	27.136	159894	<42.6	<7.07	8.75632	139.973	493292	517243	18.3298	<0.0115	2.54733	0.04514	0.16779	0.5825	0.28015	2.26936	0.86843
Zircons treated as unknowns:
AusZ-2	T17MA21A027.csv		36.7592	4.82666	36.7592	4.82666	174.334	2.51348	0.0496914	9.01779	0.0391831	8.92471	0.00573986	2.35025	0.268491	0.001679	5.92655	0.837985		36.8956	4.7005	4.80706	179.544	234.105	117.054	39.0262	17.8494	17.878	34.0045	11.8531	11.9546	30	27.136	149113	96.9302	<2.62	9.31799	961.759	492122	484309	22.5839	<0.0111	3.16339	0.290048	3.60078	5.73726	4.2092	24.2874	8.86727
AusZ-2	T17MA21A030.csv		37.918	4.6372	37.918	4.6372	167.901	2.31818	0.0545027	8.48806	0.0447206	8.39686	0.00595752	2.24695	0.263462	0.00218421	5.31693	0.838075		38.2906	4.49389	4.60523	390.879	97.4496	48.7277	44.4225	16.7937	16.8241	44.2253	10.6339	10.7469	30	27.136	140215	135.505	<2.82	11.8617	980.971	492038	481551	18.9307	<0.0111	3.15895	0.292484	3.34665	5.74659	4.28036	24.4115	8.79915
AusZ-2	T17MA21A026.csv		38.6897	4.69101			166.247	2.56723	0.0411671	9.63866	0.0340163	9.56093	0.00601981	2.34551	0.257374	0.00191155	5.62197	0.8381		38.6897	4.69101	4.79777	7.27596e-08	6.74097e+11	3.37049e+11	33.9651	19.1219	19.1486	38.7098	11.2439	11.3509	30	27.136	141744	131.637	<2.62	12.3626	981.229	492011	487636	18.3187	0.0134096	3.10054	0.300503	3.58272	6.18708	4.19437	24.1756	8.97821
AusZ-2	T17MA21A029.csv		39.0835	4.63081			164.506	2.32629	0.0428821	9.45636	0.035886	9.37701	0.00608127	2.3154	0.238881	0.00173558	5.87637	0.838126		39.0835	4.63081	4.73893	7.27596e-08	6.48023e+11	3.24012e+11	35.7995	18.754	18.7813	35.1494	11.7527	11.8551	30	27.136	147000	108.986	3.04655	23.4499	945.656	492133	484641	19.6727	0.0220098	3.04282	0.255859	3.31049	5.71663	4.08094	23.3913	8.75131
AusZ-2	T17MA21A028.csv		39.2792	4.74444	39.2792	4.74444	163.354	2.41077	0.0485022	8.80713	0.0408458	8.72707	0.00612493	2.31478	0.264017	0.00181827	5.71421	0.838144		39.3633	4.62956	4.73771	122.786	337.841	168.922	40.6495	17.4541	17.4834	36.8227	11.4284	11.5336	30	27.136	139616	111.759	3.15921	21.0783	980.746	492064	483854	22.2629	<0.011	3.27778	0.252928	3.43945	5.99743	4.33011	23.9883	8.93195
AusZ-2	T17MA21A031.csv		39.6223	4.42868	39.6223	4.42868	160.42	2.3436	0.0555891	8.2204	0.0477731	8.13657	0.00623448	2.14073	0.274171	0.00188745	5.64773	0.838189		40.0652	4.28147	4.39818	434.999	84.1535	42.0801	47.3849	16.2731	16.3045	38.2223	11.2955	11.4019	30	27.136	149615	103.911	4.49101	8.33574	967.97	492129	481405	24.6565	0.0377264	3.04014	0.285332	3.51718	6.09495	4.12737	24.064	8.9896
BB16zircon	T17MA21A061.csv		553.889	1.5144	553.889	1.5144	11.1127	0.766916	0.0603264	2.26003	0.759167	2.62248	0.089907	0.758056	0.321341	0.027928	2.99546	0.873783		554.986	1.51611	1.81979	614.339	15.8891	7.96214	573.53	5.24497	5.34151	558.335	5.99092	6.18928	30	26.425	145758	<42.4	<4.12	<6.69	56.3916	491053	496394	15.6003	<0.0109	1.33285	0.0136405	0.333374	0.374126	0.141143	1.39218	0.436876
BB16zircon	T17MA21A058.csv		562.173	1.48238	562.173	1.48238	10.9427	0.757304	0.0600464	2.40777	0.767035	2.77579	0.0912546	0.739147	0.300034	0.0287189	3.08698	0.874373		562.951	1.47829	1.78841	604.28	17.2385	8.63549	578.061	5.55159	5.64289	573.926	6.17396	6.36663	30	27.136	146047	<40.4	<3.31	<6.69	59.8241	491134	491028	13.9456	<0.0107	1.27925	0.0311504	0.240501	0.536106	0.150424	1.50717	0.386279
BB16zircon	T17MA21A060.csv		562.349	1.48965			10.9584	0.748852	0.0584665	2.45294	0.745902	2.77355	0.0911527	0.744827	0.291984	0.0288627	3.06266	0.874328		562.349	1.48965	1.79781	546.311	19.6161	9.82231	565.844	5.54709	5.63847	576.759	6.12531	6.31946	30	27.136	144676	<41.7	<3.81	<6.65	55.3629	491074	493779	14.2773	0.0142395	1.24933	0.0572835	0.255593	0.371034	0.14548	1.33168	0.416426
BB16zircon	T17MA21A057.csv		562.654	1.47113	562.654	1.47113	10.9345	0.746786	0.0599864	2.33781	0.766576	2.70021	0.0913279	0.734501	0.30429	0.027718	3.12227	0.874405		563.384	1.469	1.78073	602.118	16.8038	8.41856	577.797	5.40043	5.49424	554.194	6.24454	6.43509	30	26.418	147523	<39.6	4.35424	<6.69	59.0636	491165	488561	13.0776	<0.0106	1.31	0.0420603	0.32473	0.394756	0.128685	1.40391	0.419043
BB16zircon	T17MA21A059.csv		565.56	1.43913	565.56	1.43913	10.8793	0.732751	0.0599328	2.10577	0.770441	2.52998	0.0918057	0.72164	0.328644	0.0277127	3.20928	0.874614		566.206	1.44328	1.75958	600.181	15.1897	7.61327	580.016	5.05997	5.15998	554.09	6.41856	6.6041	30	26.045	147915	<41.2	5.06427	<6.69	55.7704	491100	493176	17.0328	0.0179683	1.29035	0.0737916	0.283834	0.485985	0.124973	1.54617	0.402394
FC-1	T17AP12A08.csv		1077.64	1.64404			5.49521	0.82489	0.0742647	0.479865	1.8592	2.29508	0.181954	0.822019	0.864381	0.0541702	1.78554	0.9152		1077.64	1.64404	1.92767	1047.77	1.84653	1.06414	1066.7	4.59015	4.70017	1069.32	3.57107	3.8947	34	26.449	151235	885.524	<8.85	4.36439	6160.26	475022	468096	11.5987	0.0684581	36.8	0.918584	11.3726	20.5249	0.621015	111.723	38.2377
FC-1	T17AP12A12.csv		1088.98	2.01225	1088.98	2.01225	5.40723	1.03061	0.0797857	2.15447	2.03857	3.15689	0.184918	1.0238	0.431529	0.0575746	2.61702	0.91657		1093.78	2.04761	2.28161	1190.81	7.14191	3.60994	1128.48	6.31378	6.39421	1134.67	5.23403	5.45997	34	26.449	151858	119.176	17.884	<3.87	504.397	491771	486821	<1.18	<0.0261	4.20594	0.0867467	0.420951	1.22117	0.0602528	7.95653	3.05084
FC-1	T17AP12A07.csv		1096.16	1.66213			5.39445	0.833903	0.075514	0.735502	1.92407	2.35863	0.185355	0.831063	0.749969	0.0561285	1.81353	0.916772		1096.16	1.66213	1.94312	1081.32	2.72865	1.46334	1089.48	4.71725	4.82437	1106.93	3.62706	3.9461	34	26.449	154604	268.906	14	<3.84	3000.76	489596	482083	2.9133	0.0478526	11.1503	0.591748	7.37862	11.0648	0.584488	57.4442	19.5609
FC-1	T17AP12A10.csv		1102.69	2.58834	1102.69	2.58834	5.36536	1.28113	0.0786756	4.36847	1.99584	4.57526	0.187086	1.27929	0.281416	0.058079	3.62805	0.917573		1105.57	2.55857	2.74943	1163.1	14.8862	7.46187	1114.1	9.15052	9.20619	1144.34	7.25609	7.42072	34	4.202	138670	223.397	<16.3	<6.91	1795.75	490769	485862	<0.48	<0.0393	8.89095	0.234144	1.916	5.74603	0.219593	39.413	13.5571
FC-1	T17AP12A06.csv		1104.26	1.68533			5.35153	0.845468	0.0754468	0.90397	1.93618	2.41245	0.186845	0.842667	0.683079	0.0567912	1.86126	0.917461		1104.26	1.68533	1.96301	1079.53	3.3601	1.7614	1093.68	4.82489	4.92967	1119.65	3.72253	4.03402	34	26.449	154127	480.688	<8.78	8.08674	2211.52	492103	483324	1.52559	7.37517	42.1193	3.52341	20.9128	10.4654	0.914571	46.0919	15.6493
FC-1	T17AP12A09.csv		1118.74	1.78887			5.27604	0.897075	0.0754013	1.48763	1.96743	2.66432	0.189514	0.894436	0.516399	0.0563354	2.04564	0.918697		1118.74	1.78887	2.05259	1078.32	5.53678	2.8185	1104.43	5.32864	5.4237	1110.9	4.09129	4.37662	34	26.261	153530	302.3	10.1592	<3.75	997.159	493606	487470	2.25224	<0.0201	8.48737	0.124214	1.30592	3.15999	0.126188	19.5926	6.85609
FC-1	T17AP12A11.csv		1129.91	1.75781			5.22656	0.884463	0.0760239	1.15767	1.97433	2.50322	0.191577	0.878905	0.607097	0.0583814	1.89284	0.919654		1129.91	1.75781	2.02557	1094.81	4.23343	2.18185	1106.79	5.00644	5.10749	1150.13	3.78568	4.09238	34	14.313	149663	303.721	17.8271	<4.26	1971.96	487423	482762	1.10968	<0.0264	8.65959	0.30035	4.63211	9.04009	0.410136	47.147	15.0332
Mudtank	T17MA21A014.csv		694.604	4.21349	694.604	4.21349	8.66243	2.41002	0.0756228	6.41129	1.18944	6.37366	0.1156	2.08565	0.351864	0.0390076	4.64719	0.885117		705.188	4.1713	4.29101	1084.21	23.7118	23.7177	795.699	12.7473	12.7873	775.648	9.29438	9.42346	30	27.136	154930	<62.8	<5.72	9.86144	63.6269	490366	499095	18.5953	<0.0112	0.630894	0.105193	0.655412	0.905931	0.635002	3.25814	0.954876
Mudtank	T17MA21A021.csv		694.855	3.86394	694.855	3.86394	8.70447	2.16514	0.0712775	6.32557	1.12083	6.3043	0.115026	1.91124	0.323838	0.033143	4.77519	0.884861		701.87	3.82248	3.95277	964.471	26.7804	26.7856	763.372	12.6086	12.6491	660.911	9.55038	9.67605	30	27.136	145284	<53.7	6.49347	12.2201	58.9705	490477	493354	15.8342	<0.0111	0.706896	0.0993083	0.594094	1.12792	0.650937	3.59736	0.932959
Mudtank	T17MA21A064.csv		703.435	4.99748	703.435	4.99748	8.40016	2.51661	0.0886626	7.10726	1.47529	6.99272	0.119025	2.45012	0.333783	0.0387104	5.10132	0.886641		724.947	4.90024	5.00254	1396.02	19.5224	9.77554	920.3	13.9854	14.0219	769.849	10.2026	10.3204	30	27.136	145751	<43.9	<5.33	11.909	61.976	489217	502544	19.8985	<0.0113	0.648769	0.0582267	0.447428	0.895079	0.443566	3.05446	0.803664
Mudtank	T17MA21A066.csv		710.38	5.55892	710.38	5.55892	8.33964	2.77064	0.0868668	7.82191	1.45532	7.67077	0.119964	2.73534	0.333887	0.0389107	5.49297	0.88706		730.356	5.47069	5.56251	1356.68	22.2291	11.1271	912.077	15.3415	15.3748	773.756	10.9859	11.0954	30	27.136	145881	56.3999	<6.18	<7.22	58.6377	488749	508155	17.0873	0.0114565	0.609388	0.0438962	0.372576	0.793751	0.398142	2.46754	0.778362
Mudtank	T17MA21A015.csv		711.319	3.74123	711.319	3.74123	8.43887	1.94993	0.0770012	6.07045	1.24395	6.05098	0.118666	1.83911	0.305826	0.0382872	4.56676	0.886481		722.879	3.67823	3.81345	1120.33	21.6111	21.6175	820.67	12.102	12.1441	761.587	9.13352	9.26484	30	27.136	152277	<62.0	<5.42	<8.17	62.543	490405	498859	20.8255	0.0131009	0.680346	0.106262	0.612355	1.07136	0.656684	3.52566	1.02803
Mudtank	T17MA21A012.csv		717.165	3.98106	717.165	3.98106	8.46915	2.09513	0.0670995	6.72473	1.07822	6.69245	0.118225	1.9763	0.297454	0.0341596	4.89136	0.886285		720.339	3.9526	4.07874	839.934	33.3332	33.3374	742.764	13.3849	13.423	680.847	9.78272	9.90544	30	27.136	146206	<64.7	6.62245	<8.36	66.1949	490370	500359	16.3394	<0.0111	0.606014	0.0855264	0.638208	0.913653	0.532628	3.30689	0.950618
Mudtank	T17MA21A063.csv		718.155	5.03329	718.155	5.03329	8.27041	2.56461	0.0839726	7.4911	1.41879	7.36819	0.120879	2.4729	0.323899	0.0368967	5.42156	0.887468		735.618	4.9458	5.04717	1291.05	22.5779	11.3013	896.856	14.7364	14.771	734.424	10.8431	10.954	30	26.826	144193	58.9594	7.4274	7.48498	70.296	489094	498746	19.884	<0.0115	0.574363	0.0621181	0.571899	0.911899	0.523322	2.9144	0.844997
Mudtank	T17MA21A013.csv		718.997	4.34075			8.4864	2.48996	0.0545154	7.34701	0.874716	7.32072	0.117993	2.17037	0.320975	0.036849	4.69756	0.886181		718.997	4.34075	4.45591	391.399	84.2296	84.2312	638.125	14.6414	14.6763	733.493	9.39511	9.52283	30	27.136	146275	84.6021	7.52528	<8.32	68.6628	490203	497936	19.7317	<0.0112	0.67645	0.098724	0.717337	1.19353	0.607349	3.46828	0.922172
Mudtank	T17MA21A065.csv		728.861	5.08961	728.861	5.08961	8.34201	2.77011	0.0650329	8.44764	1.08903	8.33776	0.119911	2.53722	0.31159	0.0377099	5.31927	0.887036		730.047	5.07444	5.1733	774.463	45.8905	22.9514	748.033	16.6755	16.7061	750.316	10.6385	10.7515	30	26.75	151055	84.5621	<5.90	<7.36	58.7709	488913	503233	19.6051	<0.0116	0.628122	0.0341697	0.355302	0.643174	0.474561	3.21365	0.815457
Mudtank	T17MA21A062.csv		751.009	4.55976			8.08765	2.5353	0.062263	8.49271	1.07627	8.39151	0.123558	2.27988	0.286053	0.0407287	5.1159	0.888664		751.009	4.55976	4.66952	682.202	53.1668	26.5887	741.813	16.783	16.8134	809.195	10.2318	10.3492	30	27.136	146175	<43.9	6.98063	<6.92	57.7104	489273	496032	16.2941	<0.0113	0.560025	0.0528224	0.495162	0.784108	0.449929	2.88347	0.806849
OG-1	T17MA21A022.csv	Slight Pb loss	3444.3	0.459275	3315.41	1.9073	1.44994	0.578963	0.295158	0.509677	27.8581	1.57069	0.691084	0.564835	0.750592	0.187252	2.3527	1.14559		3386.74	1.12967	1.51301	3444.3	0.459275	0.700649	3414.11	3.14139	3.30006	3479.14	4.70539	4.95549	30	23.6	151814	85.6541	3.82	155.778	342.085	488762	488034	17.8007	8.02716	215.346	6.61983	36.4789	11.3646	2.28264	13.5062	2.41595
OG-1	T17MA21A023.csv	Pb loss	3463.13	0.776007	2860.31	1.79534	1.61327	0.6934	0.298763	0.86707	25.7203	1.67874	0.622649	0.680373	0.624555	0.188217	2.43267	1.12139		3120.44	1.36075	1.69254	3463.13	0.776007	0.939235	3335.96	3.35749	3.5064	3495.62	4.86534	5.10761	30	11.387	155511	152.903	9.40395	100.148	1165.36	487693	482792	16.7867	20.1008	707.651	19.438	104.237	29.8717	6.42519	47.3139	9.82394
OG-1	T17MA21A025.csv	Reverse discordant	3463.99	0.546605			1.37043	0.611959	0.298928	0.610938	29.9509	1.60625	0.73175	0.597574	0.707697	0.188623	2.35975	1.15687		3539.92	1.19515	1.56251	3463.99	0.546605	0.760758	3485.2	3.2125	3.36782	3502.55	4.71951	4.96889	30	21.408	159003	238.724	33.3329	1216.33	687.519	487526	483144	14.0709	0.452999	12.642	0.525957	5.31768	4.8118	1.31708	13.9932	4.21423
OG-1	T17MA21A024.csv		3470.96	0.500686			1.38982	0.602356	0.300277	0.561027	29.6427	1.59109	0.720245	0.586999	0.731765	0.183674	2.30883	1.15396		3496.95	1.174	1.54639	3470.96	0.500686	0.728465	3475.04	3.18218	3.33892	3417.96	4.61765	4.87225	30	26.729	151614	108.437	6.67009	13.6543	941.521	488792	483561	19.1049	0.0348315	11.5712	0.199585	3.00446	5.30355	1.44846	21.639	6.77658
Penglai	T17MA21A010.csv		3.45317	22.9288			1868.86	11.4651	< DL	38.9774	< DL	37.2878	0.000535818	11.4644		0.000723514	12.2913	0.83584		3.45317	22.9288	22.9509	< DL	< DL	< DL	< DL	74.5757	74.5825	14.6602	24.5825	24.6316	30	25.684	143437	76.5431	<6.58	<8.50	545.552	492365	501660	21.0299	<0.0112	4.5987	0.137134	0.891467	2.16116	1.72794	11.9773	4.47372
Penglai	T17MA21A009.csv		3.94062	21.6293			1638.32	10.8154	< DL	30.8658	< DL	28.9538	0.000611478	10.8147		0.000539479	14.1918	0.835871		3.94062	21.6293	21.6527	< DL	< DL	< DL	< DL	57.9075	57.9164	10.9322	28.3836	28.4261	30	25.022	153108	<66.7	<6.59	<8.49	566.19	492511	504705	23.496	<0.0112	4.56967	0.110481	0.956514	2.25027	1.69546	11.8111	4.5079
Penglai	T17MA21A006.csv		3.98355	31.0214	0.243062	761.444	1618.46	15.5112	0.787696	23.2366	0.0660405	17.3794	0.000618141	15.5107	0.555199	< DL	2.24638	0.835874		3.98355	31.0214	31.0377	4899.02	13.5242	6.78279	64.935	34.7588	34.7735	< DL	4.49276	4.75405	30	27.136	149405	71.7266	<5.93	8.55609	266.229	492889	504317	21.722	<0.0108	2.1314	0.0994868	0.502164	1.2825	0.926146	6.49569	2.2386
Penglai	T17MA21A008.csv		4.44864	20.0257			1449.81	10.0137	< DL	54.4118	< DL	53.5067	0.000690336	10.0129		0.000624379	13.0746	0.835904		4.44864	20.0257	20.051	< DL	< DL	< DL	< DL	107.013	107.018	12.6521	26.1491	26.1953	30	26.237	149174	<65.4	7.80447	<8.33	559.543	492518	504420	19.3089	<0.011	4.642	0.109516	0.95757	2.39868	1.72576	11.9317	4.50355
Penglai	T17MA21A011.csv		4.6096	30.6771			1399.97	15.3391	< DL	0.287658	< DL	1.51963	0.000715323	15.3386		< DL	29.229	0.835914		4.6096	30.6771	30.6936	< DL	< DL	< DL	< DL	3.03927	3.203	< DL	58.458	58.4787	30	26.583	150115	<66.5	<6.53	<8.54	239.677	493024	503990	18.7922	0.0130345	2.08177	0.0860454	0.629891	1.22788	0.975347	5.94202	2.14315
Penglai	T17MA21A005.csv		4.73535	30.5664			1362.73	15.2837	< DL	34.1403	< DL	30.5729	0.000734843	15.2832		< DL	2.24638	0.835922		4.73535	30.5664	30.583	< DL	< DL	< DL	< DL	61.1458	61.1542	< DL	4.49276	4.75405	30	24.154	150077	68.3108	<5.76	<8.34	251.718	492947	506351	20.5411	<0.011	2.03562	0.111312	0.659675	1.10756	1.00208	5.97509	2.09946
Penglai	T17MA21A007.csv		7.40365	23.5858			870.754	11.7936	< DL	0.287658	< DL	1.51963	0.00114916	11.7929		< DL	22.2911	0.836092		7.40365	23.5858	23.6072	< DL	< DL	< DL	< DL	3.03927	3.203	< DL	44.5822	44.6093	30	27.136	144056	<64.3	<6.18	<8.22	235.791	493083	503259	21.9976	<0.0108	2.11726	0.113818	0.603718	1.50605	0.952482	5.79534	2.1049
Plesovice	T17AP12A17.csv	Pb loss, do not use			295.087	2.03727	21.2435	1.01854	0.0561771	2.77122	0.367615	3.41838	0.0470712	1.01502	0.344979	0.0131297	3.85358	0.855305		296.514	2.03004	2.26586	458.384	26.8131	26.8183	317.884	6.83676	6.9111	264.404	7.70716	7.86235	34	26.449	152753	217.143	67.0528	17.1841	344.71	490958	486732	1.68934	0.600468	6.17124	1.09803	5.4729	3.59785	1.3403	10.6361	3.6959
Plesovice	T17AP12A19.csv		334.228	1.99426	334.228	1.99426	18.7503	0.996246	0.0548881	2.90407	0.407956	3.62661	0.0533314	0.99387	0.324489	0.0174694	3.73191	0.857972		334.941	1.98774	2.22804	406.669	31.9579	31.9623	347.402	7.25323	7.32335	351.046	7.46383	7.62397	34	26.449	152338	286.57	56.3725	7.65333	324.007	491835	486938	2.64311	<0.0352	1.88562	0.114782	1.1389	2.02874	0.504136	8.24225	2.85211
Plesovice	T17AP12A20.csv		335.289	1.98845			18.7304	0.996601	0.0529601	2.82294	0.394521	3.5761	0.0533882	0.994226	0.3329	0.0169248	4.07282	0.857996		335.289	1.98845	2.22868	326.076	39.2979	39.3015	337.667	7.1522	7.2233	340.194	8.14564	8.29262	34	26.449	153272	236.214	54.5559	6.81329	335.271	492322	486970	1.98969	<0.0362	1.88268	0.134174	1.0593	2.30097	0.56551	8.20936	3.11213
Plesovice	T17AP12A16.csv		335.395	1.9849	335.395	1.9849	18.6641	0.993322	0.0557158	2.72042	0.414462	3.49042	0.053576	0.990939	0.342987	0.017302	3.87629	0.858076		336.438	1.98188	2.22281	440.068	27.5043	27.5094	352.083	6.98083	7.05366	347.71	7.75259	7.90688	34	26.449	153944	205.847	63.5475	9.8311	329.612	490849	486766	2.66011	0.175492	2.65233	0.398704	2.32696	2.60452	0.761163	8.81653	3.156
Plesovice	T17AP12A18.csv		335.477	2.00631	335.477	2.00631	18.7042	1.01092	0.0538102	2.6665	0.400428	3.45671	0.0534623	1.00394	0.3545	0.0170579	4.32826	0.858028		335.742	2.00789	2.24603	362.108	33.2136	33.2179	341.959	6.91342	6.98695	342.845	8.65652	8.79497	34	26.449	152990	167.893	50.0556	7.42041	300.175	491351	487007	2.75291	<0.0351	1.54782	0.178577	0.875401	1.67719	0.493791	6.84804	2.66819
Plesovice	T17MA21A042.csv		336.523	1.42485	336.523	1.42485	18.5967	0.725933	0.054874	2.18575	0.409935	2.61133	0.0537027	0.708624	0.315191	0.0170513	3.88887	0.858131		337.213	1.41725	1.73829	406.092	24.0898	24.0956	348.829	5.22267	5.31962	342.713	7.77775	7.93155	30	26.653	145392	219.634	55.1973	12.5495	316.744	488098	478726	20.0564	0.0122184	1.48462	0.0925907	1.02827	1.95067	0.525438	7.47207	2.99346
Plesovice	T17MA21A041.csv		338.205	1.491			18.5454	0.759367	0.0527219	2.23737	0.394474	2.61075	0.0538648	0.745501	0.321395	0.0164834	3.5968	0.8582		338.205	1.491	1.79893	315.833	32.2151	32.2194	337.633	5.22149	5.31847	331.393	7.1936	7.35963	30	26.722	141287	203.747	56.7004	9.97711	288.663	488119	479992	18.951	0.0237366	1.42819	0.0989928	0.793224	1.87613	0.47483	7.20254	2.80047
Plesovice	T17MA21A039.csv		338.852	1.52479			18.5123	0.777499	0.0529823	2.31266	0.396965	2.71528	0.0539707	0.762397	0.318666	0.0179729	4.13927	0.858245		338.852	1.52479	1.82703	327.025	32.0955	32.0999	339.445	5.43056	5.52386	361.073	8.27854	8.42321	30	25.818	145881	290.786	55.5065	22.9463	289.452	487922	479533	19.3389	0.0158887	1.28386	0.096349	1.02893	1.88967	0.512956	7.25654	2.91097
Plesovice	T17MA21A040.csv		339.398	1.43523	339.398	1.43523	18.4792	0.717738	0.0534443	2.55439	0.400933	2.88043	0.0540729	0.709567	0.270506	0.0166275	4.06737	0.858289		339.477	1.41913	1.73983	346.695	33.3225	33.3267	342.324	5.76086	5.8489	334.266	8.13475	8.28193	30	26.37	151572	243.824	53.5077	11.576	304.321	488001	479183	20.2363	<0.0108	1.39266	0.119727	0.923785	1.68646	0.455707	7.24144	2.83339
Plesovice	T17MA21A034.csv		340.484	1.44059			18.4359	0.730185	0.052952	2.57231	0.396779	2.82271	0.0542375	0.720293	0.273074	0.0166574	3.86849	0.858359		340.484	1.44059	1.75737	325.726	35.8496	35.8535	339.31	5.64543	5.73524	334.863	7.73699	7.89158	30	26.039	145797	273.731	59.3268	9.76372	319.086	487777	476920	18.4943	<0.0108	1.45089	0.123082	0.976056	1.89283	0.538014	7.87907	3.03326
Plesovice	T17MA21A033.csv		341.574	1.41823			18.3789	0.724195	0.0529453	2.32517	0.3975	2.71443	0.0544157	0.709113	0.297369	0.0175762	3.96083	0.858435		341.574	1.41823	1.73908	325.438	32.4357	32.44	339.833	5.42886	5.52219	353.172	7.92166	8.07272	30	26.598	147665	280.928	54.5281	7.07756	322.236	487776	478408	16.6754	0.0261147	1.47666	0.105616	0.993218	2.07441	0.52993	8.23567	3.10088
Plesovice	T17MA21A032.csv		343.001	1.38319	343.001	1.38319	18.2827	0.700961	0.0540817	2.06776	0.408276	2.54252	0.0546998	0.689338	0.32105	0.0169692	3.86018	0.858557		343.311	1.37868	1.70698	373.45	24.9237	24.9293	347.633	5.08505	5.18457	341.077	7.72037	7.87529	30	26.197	150275	290.92	58.8649	15.9703	339.108	487730	477933	17.7785	0.0162776	1.42188	0.112339	1.18147	2.15712	0.537213	8.03792	3.25947
QingHu	T17AP12A40.csv		149.107	2.00732	149.107	2.00732	42.5881	0.995059	0.0516904	2.97169	0.170769	3.64372	0.0234783	0.99268	0.317518	0.00755133	2.86126	0.845356		149.601	1.98536	2.22592	270.716	50.3245	25.1678	160.086	7.28745	7.35724	152.489	5.72253	5.92988	34	26.449	157476	80.0474	<8.66	9.35404	440.057	500612	485169	6.74302	0.501323	16.1689	0.403941	1.79975	1.18601	<0.273	6.48511	2.28976
QingHu	T17AP12A43.csv		151.356	2.06477	151.356	2.06477	42.0588	1.02338	0.049632	3.20499	0.165433	3.82716	0.0237735	1.02106	0.304177	0.00719743	2.25305	0.845479		151.46	2.04213	2.27669	176.754	84.5598	42.2832	155.448	7.65432	7.7208	145.368	4.50611	4.76667	34	26.449	156036	305.962	20.3433	<3.57	1164.27	500713	486622	7.39698	1.14773	15.0517	0.588567	4.40131	5.64584	0.488183	26.7839	8.63956
QingHu	T17AP12A42.csv		153.05	1.9408			41.6169	0.973837	0.0489209	2.55093	0.165022	3.38122	0.024026	0.970402	0.356652	0.00760474	2.16462	0.845585		153.05	1.9408	2.18627	142.994	83.7117	41.8592	155.09	6.76245	6.8376	153.564	4.32923	4.59983	34	26.449	156928	169.316	13.0139	<3.56	933.584	501526	487132	7.33852	<0.0246	18.5262	0.236568	2.14286	3.76814	0.610989	18.5525	6.23506
QingHu	T17AP12A41.csv		154.061	2.22452	154.061	2.22452	41.1517	1.10136	0.0527753	3.31061	0.180253	3.93252	0.0242977	1.09921	0.315665	0.00770038	2.5817	0.845699		154.76	2.19841	2.41786	318.134	47.3042	23.658	168.278	7.86504	7.92975	155.488	5.16339	5.39229	34	26.449	157545	<68.7	8.84059	<3.64	746.719	502326	487231	2.28025	<0.0244	8.79747	0.179264	2.03484	3.34332	0.402888	16.7728	5.57569
QingHu	T17AP12A44.csv		154.679	2.09464	154.679	2.09464	40.7082	1.03606	0.0581402	2.89064	0.199899	3.58609	0.0245621	1.03378	0.337402	0.00849356	2.44752	0.845809		156.424	2.06756	2.29953	534.07	23.6954	11.8595	185.041	7.17218	7.24308	171.436	4.89505	5.13591	34	26.449	155991	155.955	10.9588	<3.54	663.044	500701	487207	4.93429	0.0293222	11.852	0.15424	1.3102	2.63085	<0.336	12.917	4.38414
QingHu	T17AP12A46.csv		155.928	2.03511			40.839	1.01988	0.0490918	2.87836	0.167607	3.62939	0.0244833	1.01756	0.33398	0.0077682	2.38493	0.845776		155.928	2.03511	2.2704	151.173	89.2111	44.6087	157.34	7.25878	7.32884	156.852	4.76986	5.01674	34	26.449	156512	131.559	15.572	<3.51	596.141	498139	487040	5.88214	<0.0239	13.1599	0.128372	1.27824	2.12707	<0.364	10.8104	3.79896
QingHu	T17AP12A45.csv		156.306	2.04126			40.7391	1.02294	0.0487267	3.03729	0.167107	3.73238	0.0245434	1.02063	0.319179	0.00786554	2.33717	0.845801		156.306	2.04126	2.27591	133.654	106.822	53.4134	156.905	7.46475	7.5329	158.81	4.67434	4.92602	34	26.449	157174	148.492	15.9612	<3.54	709.46	499988	487375	3.03659	0.0295294	12.8923	0.157808	1.61997	2.69352	0.381034	13.7354	4.86569
Temora	T17MA21A047.csv		406.794	2.19207	406.794	2.19207	15.3209	1.11801	0.0551227	3.71645	0.501271	3.91695	0.0651581	1.0883	0.288075	0.0194763	3.28278	0.863042		406.917	2.17661	2.39806	416.207	39.8939	39.8974	412.562	7.83391	7.89887	390.987	6.56557	6.74706	30	26.425	158597	136.528	13.3092	<6.64	1160.51	489849	481613	17.9271	<0.0104	2.82878	0.248321	3.06461	5.5212	1.1125	25.6857	8.63916
Temora	T17MA21A044.csv		411.12	2.2209	411.12	2.2209	15.0352	1.12618	0.0621918	3.74045	0.574604	3.92788	0.0664457	1.09447	0.288298	0.0192357	3.38722	0.863597		414.705	2.18893	2.40925	679.755	23.5101	23.516	460.988	7.85576	7.92054	386.202	6.77443	6.95047	30	25.763	149101	115.689	8.47581	252.383	1113.7	489572	479800	16.1586	0.172255	3.627	0.261742	3.49505	5.57227	1.40949	26.3365	8.85269
Temora	T17MA21A049.csv	U zoning	412.441	2.12566			15.1072	1.04998	0.0514637	3.74973	0.474919	3.95268	0.0660712	1.06283	0.269643	0.0205678	3.32145	0.863436		412.441	2.12566	2.35191	260.629	66.078	66.0801	394.581	7.90536	7.96974	412.678	6.6429	6.82234	30	27.136	141914	108.834	13.6542	8.32184	1263.34	490052	481815	14.8395	0.0511558	2.61337	0.195036	2.87653	5.40493	1.03141	28.4202	9.64238
Temora	T17AP12A47.csv		412.957	2.5022	412.957	2.5022	15.0475	1.25595	0.0585677	3.94922	0.541478	4.45074	0.066448	1.24309	0.303068	0.0211661	3.00506	0.863598		414.719	2.48618	2.68219	550.087	31.3449	31.3494	439.398	8.90148	8.95871	424.557	6.01012	6.20787	34	26.449	156492	228.009	19.0836	<3.53	1858.49	498973	487674	<0.183	0.0552675	4.12173	0.261844	3.45628	6.35578	1.21114	37.5401	12.5957
Temora	T17AP12A39.csv		414.947	2.81883	414.947	2.81883	15.0013	1.39832	0.0571203	4.80199	0.536188	5.18668	0.0666547	1.39663	0.279584	0.0206368	3.52227	0.863687		415.968	2.79327	2.96907	495.198	42.7361	42.7394	435.908	10.3734	10.4225	414.047	7.04454	7.214	34	26.449	157292	118.439	8.99748	<3.70	1189.82	504761	488479	0.382912	<0.0235	3.14041	0.268974	2.87943	4.92821	0.933656	25.0781	8.20264
Temora	T17AP12A25.csv		415.884	2.62268	415.884	2.62268	14.988	1.3048	0.0560492	4.34793	0.524731	4.79352	0.0667197	1.30298	0.287433	0.0211003	3.14961	0.863715		416.361	2.60597	2.79359	453.329	42.575	42.5783	428.307	9.58704	9.6402	423.25	6.29921	6.48816	34	26.449	154664	136.652	13.3047	<3.82	1389.01	498315	488412	<0.204	<0.0352	3.61413	0.31715	3.81489	5.44146	1.01282	29.1706	9.42517
Temora	T17MA21A045.csv		415.961	2.44796	415.961	2.44796	14.8579	1.25202	0.0619437	3.61154	0.579582	3.8128	0.0672226	1.21676	0.327547	0.0216886	3.23503	0.863932		419.4	2.43353	2.63346	671.21	23.0212	23.0273	464.193	7.62559	7.69232	434.926	6.47007	6.65416	30	26.218	145520	111.123	14.3771	65.0751	1150.46	489883	481603	13.3641	0.0288927	2.75307	0.251165	3.19111	5.88849	1.23227	27.0904	9.21059
Temora	T17AP12A21.csv		416.475	2.65669	416.475	2.65669	14.8434	1.31647	0.0626809	4.18385	0.589913	4.64229	0.0673694	1.31468	0.300148	0.0204433	3.10304	0.863995		420.286	2.62935	2.81541	696.473	25.5954	25.6008	470.812	9.28458	9.33946	410.204	6.20607	6.39777	34	26.449	154873	153.543	<8.11	<3.61	1395.48	494121	488808	0.894368	<0.0351	3.16049	0.2888	3.59432	5.60146	1.16519	30.6252	10.0234
Temora	T17MA21A048.csv		417.446	1.74352			14.9208	0.892882	0.0538857	3.32612	0.503258	3.53532	0.0668993	0.871758	0.259266	0.0202486	3.16186	0.863792		417.446	1.74352	2.01318	365.271	41.0481	41.0516	413.906	7.07063	7.14255	406.336	6.32372	6.51195	30	27.136	143946	125.739	7.44835	<6.51	895.756	489967	482400	14.126	0.0223484	3.27391	0.134326	1.91701	3.12753	0.54629	16.3721	5.56804
Temora	T17MA21A043.csv		418.075	1.97647			14.9033	0.999389	0.0530209	3.07977	0.494446	3.35449	0.0670034	0.988234	0.308657	0.0210202	2.98986	0.863837		418.075	1.97647	2.21799	328.681	42.5138	42.5171	407.936	6.70898	6.78473	421.66	5.97972	6.17845	30	27.136	148842	107.285	6.35976	<6.99	1003.63	489369	481693	16.5543	<0.0107	3.69487	0.122429	1.79371	3.97274	0.778504	20.6669	7.32592
Temora	T17AP12A05.csv		419.258	2.09662	419.258	2.09662	14.8264	1.04944	0.0581074	3.00302	0.537838	3.72302	0.0674435	1.04719	0.329897	0.0229	2.75365	0.864027		420.734	2.09437	2.32367	532.838	24.6788	24.6844	436.998	7.44604	7.51436	458.946	5.50729	5.72245	34	26.449	154278	164.577	<8.75	<3.84	1170.48	498623	488412	1.71121	<0.0198	5.21873	0.157787	1.67539	2.95946	0.523355	16.382	6.00403
Temora	T17MA21A046.csv		420.68	2.27864	420.68	2.27864	14.8064	1.14229	0.0552784	3.85548	0.519453	4.04242	0.0674401	1.13198	0.284071	0.0208388	3.1102	0.864025		420.713	2.26395	2.4776	422.505	40.7247	40.7282	424.786	8.08485	8.14781	418.059	6.2204	6.41167	30	26.522	148705	164.173	16.4109	265.355	1231.69	489581	481637	15.2505	0.0377658	2.65524	0.218312	3.25246	6.1361	1.24274	30.8872	10.3954
Calibraiton standard for Pb isotopes & TE:
NIST610	T17AP12A02.csv						4.32245	0.970163	0.909709	0.276045	87.5066	2.30822	0.231388	0.976463	0.961823	0.511002	1.82843	0.938301														34	26.449	326052	416.546	452.447	459.184	462.904	448.846	448	465.381	440.132	453.063	448.098	430.119	452.998	446.995	449.073	436.896
NIST610	T17AP12A15.csv						4.30116	0.945231	0.910481	0.276045	89.069	2.30047	0.23248	0.949054	0.959904	0.506615	1.83076	0.938817														34	26.449	324644	387.614	449.829	451.854	457.46	443.691	448	463.126	439.386	452.723	447.517	429.447	453.059	447.062	448.571	437.547
NIST610	T17AP12A24.csv						4.28792	0.938703	0.909361	0.276045	90.2058	2.29916	0.233212	0.939313	0.959378	0.502805	1.82319	0.939163														34	26.449	327345	446.643	454.63	465.922	467.798	453.601	448	467.348	440.709	453.294	448.611	430.644	452.842	446.859	449.658	436.244
NIST610	T17AP12A38.csv						4.28676	0.942244	0.909454	0.276045	90.7154	2.29916	0.233255	0.943912	0.959664	0.495843	1.82973	0.939184														34	26.449	325082	393.855	451.178	454.159	459.386	445.213	448	464.013	439.837	452.999	447.725	429.837	453.268	447.211	448.435	437.493
NIST610	T17AP12A50.csv						4.2979	0.933898	0.914001	0.276045	89.0361	2.30157	0.232645	0.933598	0.958984	0.480672	1.82323	0.938895														34	26.449	325724	444.069	448.998	457.647	460.101	447.842	448	463.821	438.808	452.093	447.807	429.013	451.823	446.129	450.459	436.296
NIST610	T17AP12A51.csv						4.26353	0.917315	0.906177	0.276045	88.6897	2.29686	0.234523	0.919774	0.957582	0.481001	1.81508	0.939783														34	26.449	326091	389.14	454.918	459.235	464.35	448.805	448	466.311	441.127	453.828	448.242	430.94	454.011	447.744	447.804	437.524
NIST610	T17MA21A001.csv						4.22458	0.738205	0.910571	0.261211	88.5869	1.60443	0.236443	0.72817	0.942722	0.527898	2.31031	0.940693														30	27.136	321281	378.777	440.264	456.997	454.657	448	443.033	459.442	435.626	448.206	443.583	424.391	448.661	441.992	445.986	432.893
NIST610	T17MA21A002.csv						4.24358	0.727613	0.909218	0.261211	88.0942	1.60668	0.235502	0.719156	0.941188	0.525603	2.29777	0.940247														30	27.136	328287	455.486	461.772	456.596	465.313	448	442.149	465.27	439.482	453.202	448.28	431.961	453.282	448.321	448.18	437.414
NIST610	T17MA21A018.csv						4.27366	0.745233	0.908919	0.261211	88.1511	1.60511	0.234317	0.733716	0.943708	0.512879	2.3059	0.939686														30	27.136	334221	420.8	453.176	474.008	472.999	448	470.631	477.053	455.787	467.869	461.769	442.93	466.934	460.116	461.834	449.629
NIST610	T17MA21A019.csv						4.26875	0.748698	0.910478	0.261211	88.4664	1.60398	0.234578	0.73802	0.944186	0.511688	2.31234	0.93981														30	27.136	325770	386.188	463.258	449.627	469.203	448	464.005	472.849	443.543	456.456	450.788	432.259	455.299	448.664	450.755	438.869
NIST610	T17MA21A037.csv						4.37751	0.715405	0.908687	0.261211	87.2077	1.60193	0.228281	0.703695	0.939344	0.499801	2.30423	0.936834														30	27.136	299671	382.43	425.911	440.97	414.679	448	376.299	434.345	405.567	418.108	413.897	399.17	418.868	415.002	417.373	406.492
NIST610	T17MA21A038.csv						4.24877	0.748383	0.911878	0.261211	90.2299	1.60045	0.235164	0.737206	0.944143	0.518902	2.30577	0.940087														30	27.136	341233	469.719	459.167	468.07	483.017	448	463.71	468.168	446.352	461.497	458.441	438.549	464.033	458.288	460.842	447.354
NIST610	T17MA21A052.csv						4.47092	0.760519	0.9062	0.261211	85.8481	1.60313	0.223248	0.753841	0.94577	0.488165	2.29627	0.934461														30	27.136	309706	350.924	428.971	433.73	446.542	448	427.435	440.865	424.63	434.951	430.013	411.202	432.571	425.451	426.455	417.5
NIST610	T17MA21A053.csv						4.3118	0.709195	0.913193	0.261211	89.7345	1.60308	0.231493	0.695541	0.938374	0.515917	2.31219	0.93835														30	27.136	347338	455.751	485.114	482.161	492.491	448	505.133	504.943	472.683	487.058	480.143	462.456	487.326	480.641	482.753	468.178
NIST610	T17MA21A069.csv						4.316	0.742382	0.906692	0.261211	88.9778	1.61408	0.232082	0.73509	0.943311	0.518919	2.30726	0.938629														30	27.136	343166	434.79	484.496	505.562	492.826	448	476.409	495.712	463.987	478.078	472.47	452.082	476.695	472.012	475.057	461.155
NIST610	T17MA21A070.csv						4.30304	0.761918	0.912802	0.261211	89.8058	1.59776	0.232894	0.753541	0.945953	0.525395	2.31004	0.939013														30	27.136	307563	394.939	417.832	412.229	428.193	448	411.119	431.402	412.325	424.552	420.58	404.961	426.288	419.478	420.729	410.494
91500																							1061.49	Wtd Mean (from internal errs)
																							22.2553	2-sigma err. of mean
																							0.603272	MSWD
																							0	rejected
																							0.907312	Probability of fit
AusZ-2			38.5447	Wtd Mean (from internal errs)																			222.438	Wtd Mean (from internal errs)
			0.732707	2-sigma err. of mean																			170.297	2-sigma err. of mean
			1.41378	MSWD																			0.823266	MSWD
			0	rejected																			0	rejected
			0.215565	Probability of fit																			0.532792	Probability of fit
BB16zircon			561.386	Wtd Mean (from internal errs)																			594.928	Wtd Mean (from internal errs)
			3.71256	2-sigma err. of mean																			44.624	2-sigma err. of mean
			1.10731	MSWD																			0.261786	MSWD
			0	rejected																			0	rejected
			0.351021	Probability of fit																			0.902565	Probability of fit
FC-1			1101.86	Wtd Mean (from internal errs)																			1069.01	Wtd Mean (from internal errs)
			16.9811	95%-conf. err. of mean																			27.4261	95%-conf. err. of mean
			3.35732	MSWD																			2.76277	MSWD
			0	rejected																			0	rejected
			0.00261068	Probability of fit																			0.0109718	Probability of fit
Mudtank			713.071	Wtd Mean (from internal errs)																			1030.03	Wtd Mean (from internal errs)
			9.99233	2-sigma err. of mean																			213.346	95%-conf. err. of mean
			1.07889	MSWD																			4.30077	MSWD
			0	rejected																			0	rejected
			0.374469	Probability of fit																			1.301e-05	Probability of fit
OG-1			3459.05	Wtd Mean (from internal errs)																			3459.05	Wtd Mean (from internal errs)
			9.33266	2-sigma err. of mean																			9.33266	2-sigma err. of mean
			1.90687	MSWD																			1.90687	MSWD
			0	rejected																			0	rejected
			0.126023	Probability of fit																			0.126023	Probability of fit
Penglai			4.22168	Wtd Mean (from internal errs)
			0.867965	95%-conf. err. of mean
			3.11637	MSWD
			0	rejected
			0.00470481	Probability of fit
Plesovice			338.662	Wtd Mean (from internal errs)																			358.676	Wtd Mean (from internal errs)
			1.62078	2-sigma err. of mean																			33.2816	2-sigma err. of mean
			1.09206	MSWD																			0.548795	MSWD
			0	rejected																			0	rejected
			0.363736	Probability of fit																			0.856295	Probability of fit
QingHu			153.381	Wtd Mean (from internal errs)																			249.932	Wtd Mean (from internal errs)
			2.42495	95%-conf. err. of mean																			140.58	95%-conf. err. of mean
			2.77076	MSWD																			5.00482	MSWD
			0	rejected																			0	rejected
			0.0107667	Probability of fit																			3.88137e-05	Probability of fit
Temora			415.249	Wtd Mean (from internal errs)																			487.01	Wtd Mean (from internal errs)
			2.69363	2-sigma err. of mean																			91.1405	95%-conf. err. of mean
			0.732267	MSWD																			3.10434	MSWD
			0	rejected																			0	rejected
			0.708374	Probability of fit																			0.000342104	Probability of fit
[truncated: 136 more columns]

## Sheet: Quad_Exp_2_IndividualSessions
Analysis	Source Filename	Comment	Preferred Age	Preferred Age	207 corr 206Pb/238U	207 corr 206Pb/238U	238U/206Pb	238U/206Pb	207Pb/206Pb	207Pb/206Pb	207Pb/235U(calc)	207Pb/235U(calc)	206Pb/238U	206Pb/238U	Rho	208Pb/232Th	208Pb/232Th	CommPb at 206Pb/238U Age		206Pb/238U Age (Ma)	206Pb/238U Age (Ma)	206Pb/238U Age (Ma)	207Pb/206Pb Age (Ma)	207Pb/206Pb Age (Ma)	207Pb/206Pb Age (Ma)	207Pb/235U(calc) Age (Ma)	207Pb/235U(calc) Age (Ma)	207Pb/235U(calc) Age (Ma)	208Pb/232Th Age (Ma)	208Pb/232Th Age (Ma)	208Pb/232Th Age (Ma)	Spot Size (µm)	Time (s)	49Ti	56Fe	91Zr	178Hf	204Pb	206Pb	207Pb	208Pb	232Th	235U	238U		49Ti	56Fe	91Zr	178Hf
			Ma	2s%	Age	2s%	ratio	1s%	ratio	1s%	ratio	1s%	ratio	1s%		ratio	1s%			Age	2s%	2s_sys%	Age	2s%	2s_sys%	Age	2s%	2_sys%	Age	2s%	2s_sys%			ppm	ppm	ppm	ppm	ppm	ppm	ppm	ppm	ppm	ppm	ppm		1s%	1s%	1s%	1s%
Calibraiton standard for Pb/U and Pb/Th
91500	AP30C003.csv				1053.09	1.83775	5.62001	0.935226	0.076231	2.8603	1.87332	2.87424	0.177843	0.917076	0.310778	0.0514724	3.80004	0.913304		1055.18	1.83415	2.09217	1100.25	10.3995	10.413	1071.71	5.74848	5.83671	1017.37	7.60007	7.7574	30	27.111	4.46764	<9.35	493500	5617.05	<0.021	13.2568	1.01589	1.44159	28.7616	0.592884	78.3273		10.9013	2.81147	0.564927	2.03382
91500	AP30C004.csv						5.52225	0.935226	0.0739287	3.02858	1.85044	2.87424	0.181102	0.917076	0.295053	0.0545467	3.80004	0.914807		1072.99	1.83415	2.09217	1038.62	11.7729	11.7848	1063.59	5.74848	5.83671	1076.55	7.60007	7.7574	30	27.111	5.77087	<9.43	493500	5677.02	<0.0212	13.6546	1.01476	1.51928	28.6123	0.567655	79.1964		9.75903	2.81147	0.564927	2.02272
91500	AP30C022.csv				1062.74	1.82921	5.57049	0.935226	0.0762529	2.68229	1.90385	2.87424	0.179539	0.917076	0.329229	0.0555027	3.80004	0.914086		1064.45	1.83415	2.09217	1100.83	9.7464	9.76075	1082.44	5.74848	5.83671	1094.92	7.60007	7.7574	30	27.111	4.72542	<9.38	493500	5682.62	<0.022	13.5967	1.04249	1.53599	28.6388	0.576081	79.6124		10.8565	2.81147	0.564927	1.99122
91500	AP30C023.csv						5.57718	0.935226	0.0697355	2.70896	1.74032	2.87424	0.179369	0.917076	0.326334	0.0550912	3.80004	0.914007		1063.52	1.83415	2.09217	919.656	12.1113	12.1229	1023.58	5.74848	5.83671	1087.02	7.60007	7.7574	30	27.111	4.39973	<9.23	493500	5680.29	<0.0217	11.5033	0.806512	1.32266	24.8562	0.497453	67.4081		11.1424	2.81147	0.564927	1.99124
91500	AP30C041.csv				1066.18	1.85063	5.54798	0.935226	0.0762764	3.12455	1.9321	2.87424	0.180146	0.917076	0.286746	0.0516711	3.80004	0.914366		1067.77	1.83415	2.09217	1101.44	11.346	11.3583	1092.27	5.74848	5.83671	1021.2	7.60007	7.7574	30	27.111	6.03237	<9.25	493500	5627.46	<0.022	13.5147	1.03645	1.40631	28.5337	0.590104	78.9797		9.79396	7.93341	0.564927	1.99917
91500	AP30C042.csv						5.68152	0.935226	0.0728054	2.6899	1.80402	2.87424	0.176052	0.917076	0.328398	0.0576926	3.80004	0.912479		1045.37	1.83415	2.09217	1007.64	10.8286	10.8415	1046.91	5.74848	5.83671	1136.93	7.60007	7.7574	30	27.111	4.69583	<9.38	493500	5594.76	<0.0223	13.234	0.96889	1.58153	28.7598	0.598884	79.1457		11.0589	2.81147	0.564927	2.01092
91500	AP30C061.csv						5.5258	0.935226	0.0735535	2.89865	1.89361	2.87424	0.180973	0.917076	0.307056	0.0497342	3.80004	0.914747		1072.28	1.83415	2.09217	1028.34	11.3982	11.4104	1078.85	5.74848	5.83671	983.838	7.60007	7.7574	30	27.111	4.11061	<9.19	493500	5633.37	<0.0217	13.6046	1.00584	1.35485	28.9774	0.552219	79.2585		11.8201	2.81147	0.564927	2.01535
91500	AP30C062.csv						5.48672	0.935226	0.0716294	2.72291	1.8578	2.87424	0.182236	0.917076	0.324839	0.0530407	3.80004	0.91533		1079.17	1.83415	2.09217	974.52	11.3914	11.4037	1066.21	5.74848	5.83671	1047.58	7.60007	7.7574	30	27.111	3.85926	<9.34	493500	5715.04	<0.0221	13.9813	1.00671	1.44925	29.0875	0.590058	80.8851		12.2774	2.81147	0.564927	2.00339
91500	AP30C079.csv						5.59552	0.935226	0.070316	3.30805	1.79801	2.87424	0.178613	0.917076	0.27205	0.0557455	3.80004	0.913659		1059.39	1.83415	2.09217	936.681	14.4826	14.4923	1044.74	5.74848	5.83671	1099.58	7.60007	7.7574	30	27.111	4.56399	10.2445	493500	5896.38	<0.0223	11.7747	0.83211	1.31952	25.4624	0.499608	69.6073		11.527	5.05057	0.564927	1.98534
91500	AP30C080.csv						5.62001	0.935226	0.0737627	2.89763	1.87758	2.87424	0.177796	0.917076	0.307154	0.0535094	3.80004	0.913282		1054.92	1.83415	2.09217	1034.08	11.3211	11.3334	1073.21	5.74848	5.83671	1056.61	7.60007	7.7574	30	27.111	5.02548	<9.27	493500	5969.32	<0.0221	11.8022	0.87458	1.29291	26.004	0.526129	70.0804		10.9776	10.1078	0.564927	1.99468
91500	AP30C100.csv						5.60766	0.935226	0.0722217	2.90428	1.84691	2.87424	0.178555	0.917076	0.306516	0.0526862	3.80004	0.913632		1059.07	1.83415	2.09217	991.286	11.9141	11.9259	1062.33	5.74848	5.83671	1040.76	7.60007	7.7574	30	27.111	3.69233	<8.77	493500	5775.12	<0.0216	11.5326	0.836767	1.24985	25.7032	0.504322	68.3309		12.5753	2.81147	0.564927	2.01728
91500	AP30C120.csv						5.53591	0.935226	0.0715531	3.20344	1.83436	2.87424	0.180464	0.917076	0.280245	0.0537275	3.80004	0.914512		1069.5	1.83415	2.09217	972.347	13.4362	13.4466	1057.84	5.74848	5.83671	1060.8	7.60007	7.7574	30	27.111	3.762	<8.63	493500	5788.66	<0.0221	11.5112	0.827503	1.25279	25.2619	0.490527	67.5561		12.621	5.83675	0.564927	2.00753
91500	AP30C138.csv						5.55531	0.935226	0.072706	3.3276	1.83452	2.87424	0.179926	0.917076	0.270568	0.0547122	3.80004	0.914264		1066.57	1.83415	2.09217	1004.86	13.4384	13.4488	1057.9	5.74848	5.83671	1079.73	7.60007	7.7574	30	27.111	3.09244	<8.39	493500	5803.54	<0.0221	11.6282	0.849188	1.27624	25.1098	0.471803	68.4723		13.9011	6.28942	0.564927	2.00529
91500	AP30C158.csv				1049.15	1.87588	5.62812	0.935226	0.0794223	3.41612	1.9442	2.87424	0.177831	0.917076	0.264052	0.05444	3.80004	0.913299		1055.11	1.83415	2.09217	1181.8	11.4255	11.4378	1096.45	5.74848	5.83671	1074.5	7.60007	7.7574	30	27.111	3.71407	<8.15	493500	5812.02	<0.0218	11.5953	0.925108	1.29406	25.2642	0.479169	69.0827		12.7824	2.81147	0.564927	2.01355
91500	AP30C178.csv				1056.83	1.84523	5.61128	0.935226	0.0754554	3.04842	1.81742	2.87424	0.178333	0.917076	0.293298	0.0558347	3.80004	0.91353		1057.86	1.83415	2.09217	1079.76	11.3283	11.3407	1051.76	5.74848	5.83671	1101.29	7.60007	7.7574	30	27.111	4.16242	10.6435	493500	5756.24	<0.0213	11.5235	0.873623	1.33706	25.0318	0.511916	68.4601		12.1323	4.98994	0.564927	2.00299
91500	AP30C199.csv						5.48802	0.935226	0.0736623	3.13457	1.78443	2.87424	0.182025	0.917076	0.285905	0.0503659	3.80004	0.915233		1078.02	1.83415	2.09217	1031.33	12.2846	12.296	1039.8	5.74848	5.83671	996.031	7.60007	7.7574	30	27.111	3.71453	9.62667	493500	5691.59	<0.0211	11.6871	0.865358	1.22396	24.9459	0.491554	67.9659		12.848	5.18078	0.564927	1.99232
91500	AP30C219.csv				1059.36	1.8483	5.56675	0.935226	0.079252	2.95001	1.88826	2.87424	0.179589	0.917076	0.302202	0.0562992	3.80004	0.914109		1064.73	1.83415	2.09217	1177.55	9.90827	9.92239	1076.97	5.74848	5.83671	1110.21	7.60007	7.7574	30	27.111	5.08995	<7.77	493500	5659.35	<0.0209	11.7241	0.934019	1.40155	25.2125	0.510893	69.1148		11.0629	8.87398	0.564927	1.99681
91500	AP30C236.csv				1058.32	1.85153	5.57488	0.935226	0.0791178	3.01469	1.9056	2.87424	0.179377	0.917076	0.296293	0.0511742	3.80004	0.914011		1063.57	1.83415	2.09217	1174.2	10.1594	10.1732	1083.05	5.74848	5.83671	1011.62	7.60007	7.7574	30	27.111	4.33838	<7.56	493500	5546.55	<0.0205	11.4762	0.912724	1.25304	24.6757	0.501608	67.7801		11.8318	20.5489	0.564927	2.01346
91500	AP30C245.csv				1048.34	1.86104	5.65692	0.935226	0.0751523	3.36121	1.80937	2.87424	0.176783	0.917076	0.268058	0.0546133	3.80004	0.912816		1049.37	1.83415	2.09217	1071.68	12.6001	12.6112	1048.85	5.74848	5.83671	1077.83	7.60007	7.7574	30	27.111	5.52971	<7.77	493500	5696.52	<0.0213	11.4773	0.867059	1.3698	25.3013	0.466858	68.8499		10.7357	10.3201	0.564927	2.00853
91500	AP30C258.csv				1059.28	1.83405	5.58854	0.935226	0.0758092	2.80295	1.90849	2.87424	0.178838	0.917076	0.316504	0.0542305	3.80004	0.913763		1060.62	1.83415	2.09217	1089.14	10.312	10.3256	1084.06	5.74848	5.83671	1070.47	7.60007	7.7574	30	27.111	4.19119	<7.66	493500	5581.99	<0.0215	11.3701	0.866313	1.31612	24.6801	0.515312	67.4824		12.0959	2.81147	0.564927	1.99505
91500	AP30C259.csv						5.51883	0.935226	0.0702181	3.23609	1.79783	2.87424	0.181275	0.917076	0.277637	0.0539322	3.80004	0.914887		1073.93	1.83415	2.09217	933.823	14.2173	14.2271	1044.67	5.74848	5.83671	1064.74	7.60007	7.7574	30	27.111	3.12981	<7.79	493500	5659.03	<0.0219	11.3991	0.804248	1.32935	25.0946	0.474561	66.8146		13.9768	2.81147	0.564927	2.03011
91500	SE23A003.csv				1059.43	1.39142	5.5957	0.686954	0.0749957	2.52127	1.88412	1.5554	0.178691	0.685744	0.26288	0.0530551	0.95487	0.913695		1059.81	1.37149	1.70118	1067.49	9.4945	9.50924	1075.52	3.1108	3.27096	1047.86	1.90974	2.46237	30	23.932	4.82554	<13.6	493500	6011.36	<0.0116	14.0175	1.05673	1.5077	29.7423	0.615349	83.3851		18.3936	4.35825	0.759501	1.41199
91500	SE23A004.csv						5.55012	0.686954	0.0721355	2.51158	1.826	1.5554	0.180136	0.685744	0.263824	0.0541744	0.95487	0.914361		1067.71	1.37149	1.70118	988.857	10.3323	10.3458	1054.85	3.1108	3.27096	1069.39	1.90974	2.46237	30	23.932	4.51964	<13.9	493500	5934.86	<0.0114	13.8069	1.00113	1.51074	29.1388	0.596837	81.4963		19.0269	4.35825	0.759501	1.4254
91500	SE23A023.csv						5.62609	0.686954	0.0723367	2.16894	1.79296	1.5554	0.177744	0.685744	0.301941	0.0544709	0.95487	0.913258		1054.63	1.37149	1.70118	994.522	8.86422	8.88	1042.9	3.1108	3.27096	1075.1	1.90974	2.46237	30	23.932	4.40571	<14.4	493500	5906.39	<0.00901	13.9048	1.01098	1.57797	29.9509	0.59931	83.4466		18.7159	4.35825	0.759501	1.44938
91500	SE23A024.csv						5.53394	0.686954	0.07494	2.1125	1.88913	1.5554	0.180805	0.685744	0.309246	0.0541924	0.95487	0.91467		1071.37	1.37149	1.70118	1066	7.96808	7.98563	1077.27	3.1108	3.27096	1069.74	1.90974	2.46237	30	23.932	3.59535	<14.2	493500	5554.57	<0.00887	13.8357	1.04214	1.54336	29.4244	0.642577	81.6794		20.5412	4.35825	0.759501	1.46532
91500	SE23A045.csv				1065.37	1.38484	5.56212	0.686954	0.0752225	2.39135	1.8751	1.5554	0.179778	0.685744	0.2761	0.0528024	0.95487	0.914196		1065.76	1.37149	1.70118	1073.56	8.94622	8.96186	1072.33	3.1108	3.27096	1043	1.90974	2.46237	30	23.932	5.36569	<14.4	493500	5930.21	<0.00927	13.9663	1.05598	1.54042	30.1169	0.545763	82.661		16.8457	4.35825	0.759501	1.40407
91500	SE23A046.csv				1063.89	1.37461	5.56866	0.686954	0.0752629	2.18281	1.87303	1.5554	0.179528	0.685744	0.300196	0.0541995	0.95487	0.914081		1064.39	1.37149	1.70118	1074.63	8.15655	8.1737	1071.6	3.1108	3.27096	1069.88	1.90974	2.46237	30	23.932	3.97812	<14.2	493500	5788.73	<0.0092	14.7732	1.11736	1.64671	31.4048	0.635429	87.5888		19.4023	4.35825	0.759501	1.46912
91500	SE23A067.csv						5.61908	0.686954	0.0737846	2.31783	1.81561	1.5554	0.177988	0.685744	0.28416	0.0540144	0.95487	0.913371		1055.97	1.37149	1.70118	1034.68	9.04972	9.06517	1051.1	3.1108	3.27096	1066.32	1.90974	2.46237	30	23.932	5.91467	<12.6	493500	5915.26	<0.00902	13.4968	1.00097	1.48331	28.5613	0.584768	80.2671		15.4532	4.35825	0.759501	1.42202
91500	SE23A068.csv						5.56798	0.686954	0.0746433	2.26818	1.85209	1.5554	0.179517	0.685744	0.289863	0.0534116	0.95487	0.914076		1064.33	1.37149	1.70118	1058.02	8.63017	8.64638	1064.17	3.1108	3.27096	1054.72	1.90974	2.46237	30	23.932	6.71055	<12.8	493500	5845.52	<0.00917	14.695	1.10224	1.60058	31.2107	0.614275	86.6542		14.6467	4.35825	0.759501	1.43922
91500	SE23A090.csv						5.53879	0.686954	0.0743047	2.16414	1.85284	1.5554	0.180531	0.685744	0.30255	0.0538804	0.95487	0.914543		1069.87	1.37149	1.70118	1048.86	8.31765	8.33446	1064.44	3.1108	3.27096	1063.74	1.90974	2.46237	30	23.932	5.82754	<12.4	493500	6050.47	<0.00886	14.5296	1.08506	1.58697	30.8157	0.612485	84.7023		15.6413	4.35825	0.759501	1.39761
91500	SE23A091.csv				1062.73	1.37093	5.57564	0.686954	0.0753331	2.10142	1.86615	1.5554	0.179341	0.685744	0.310718	0.0535454	0.95487	0.913995		1063.37	1.37149	1.70118	1076.51	7.83661	7.85445	1069.17	3.1108	3.27096	1057.3	1.90974	2.46237	30	23.932	5.7185	<12.5	493500	5756.53	<0.0089	15.1804	1.1495	1.65265	32.3019	0.624885	89.0279		15.8272	4.35825	0.759501	1.4929
91500	SE23A113.csv						5.52418	0.686954	0.0749725	2.06405	1.87692	1.5554	0.181066	0.685744	0.315788	0.0537572	0.95487	0.91479		1072.79	1.37149	1.70118	1066.87	7.778	7.79598	1072.98	3.1108	3.27096	1061.37	1.90974	2.46237	30	23.932	4.51715	<11.4	493500	5728.1	<0.009	15.9408	1.20139	1.76181	34.2929	0.681563	92.4091		17.3623	4.35825	0.759501	1.45312
91500	SE23A114.csv				1051.52	1.3764	5.64275	0.686954	0.0744856	2.239	1.82487	1.5554	0.177199	0.685744	0.293317	0.0544405	0.95487	0.913007		1051.65	1.37149	1.70118	1053.75	8.55908	8.57542	1054.44	3.1108	3.27096	1074.51	1.90974	2.46237	30	23.932	5.71947	<11.6	493500	5839.63	<0.00926	15.1854	1.13696	1.68013	32.2691	0.610279	89.9425		15.6511	4.35825	0.759501	1.48433
91500	SE23A141.csv				1055.92	1.36834	5.61303	0.686954	0.0755645	2.03432	1.86659	1.5554	0.178198	0.685744	0.319935	0.0533278	0.95487	0.913468		1057.12	1.37149	1.70118	1082.66	7.53628	7.55483	1069.32	3.1108	3.27096	1053.11	1.90974	2.46237	30	23.932	4.79018	<10.9	493500	5667.66	<0.00975	15.5709	1.18261	1.75581	33.6178	0.64373	92.4737		16.6689	10.7093	0.759501	1.49951
91500	SE23A142.csv						5.53505	0.686954	0.0734906	2.26772	1.83958	1.5554	0.180588	0.685744	0.289918	0.0540771	0.95487	0.91457		1070.19	1.37149	1.70118	1026.61	8.93454	8.9502	1059.71	3.1108	3.27096	1067.52	1.90974	2.46237	30	23.932	4.92364	<10.9	493500	5696.71	<0.00996	13.933	1.02891	1.54355	29.1022	0.556811	81.7211		16.4521	9.14575	0.759501	1.47601
Zircons treated as unknowns:
AusZ-2	SE23A061.csv		37.8597	5.14424			169.467	2.18309	0.0416467	9.4367	0.0339003	9.38667	0.00589028	2.57212	0.225388	0.00163966	8.80114	0.838047		37.8597	5.14424	5.24178	7.27596e-08	6.5612e+11	3.2806e+11	33.8512	18.7733	18.8005	33.2084	17.6023	17.6708	30	22.74	1.93619	28.8765	493687	4912.89	<0.00938	1.24433	0.0520511	0.148196	93.9015	1.58084	224.351		27.8322	5.76334	0.760614	1.4727
AusZ-2	SE23A039.csv		38.4443	4.84584	38.4443	4.84584	165.893	2.09468	0.0522451	8.06312	0.0436772	8.02525	0.00602302	2.36792	0.25144	0.00253051	6.83657	0.838102		38.7103	4.73584	4.84161	295.132	124.702	62.353	43.4079	16.0505	16.0823	51.2284	13.6731	13.7612	30	23.932	1.39321	38.1521	493770	4794.75	<0.00848	1.2381	0.0649917	0.224745	91.693	1.59081	219.105		31.7079	5.39154	0.759501	1.47687
AusZ-2	SE23A040.csv		38.6275	4.42125	38.6275	4.42125	165.417	1.97053	0.0503116	8.41431	0.0421066	8.36828	0.00603692	2.14897	0.228019	0.00180251	8.31905	0.838107		38.7994	4.29794	4.41422	208.378	187.223	93.6129	41.8787	16.7366	16.7671	36.5038	16.6381	16.7106	30	22.437	1.92283	34.6801	493777	4789.1	<0.00862	1.24721	0.0630584	0.158876	91.3034	1.62504	221.455		27.7706	5.5419	0.760953	1.46047
AusZ-2	SE23A052.csv		39.1233	4.77005	39.1233	4.77005	163.271	1.95015	0.0515623	8.1598	0.0437727	8.12017	0.0061243	2.32933	0.232448	0.00196836	7.84485	0.838143		39.3593	4.65865	4.76614	265.022	141.297	70.6503	43.5008	16.2403	16.2718	39.8592	15.6897	15.7665	30	23.224	1.02517	<13.7	493736	4896.05	<0.00916	1.31557	0.0681939	0.182096	95.442	1.69671	227.42		37.86	13.4223	0.760123	1.46524
AusZ-2	SE23A037.csv		39.3142	4.44684	39.3142	4.44684	163.257	1.95021	0.0497282	8.31461	0.042437	8.27507	0.00613993	2.16544	0.228355	0.00190739	8.01746	0.83815		39.4594	4.33088	4.4463	181.27	213.727	106.865	42.2006	16.5501	16.581	38.6256	16.0349	16.1101	30	23.932	2.07509	<14.4	493754	4875.17	<0.00897	1.29256	0.0646329	0.171549	92.7963	1.63994	224.524		26.8278	19.4252	0.759501	1.45546
AusZ-2	SE23A030.csv		39.5695	4.48077			162.443	1.93719	0.0420347	8.94671	0.0360141	8.91249	0.00615712	2.24039	0.211621	0.00193295	7.88095	0.838157		39.5695	4.48077	4.59242	7.27596e-08	6.19171e+11	3.09585e+11	35.925	17.825	17.8536	39.1428	15.7619	15.8384	30	23.932	2.52748	17.8271	493736	4866.63	<0.00888	1.29666	0.0547824	0.175545	93.8089	1.63861	224.642		24.3581	6.46067	0.759501	1.50492
BB16	SE23A134.csv		556.11	1.85096			11.0997	0.85429	0.0585388	2.15775	0.730531	2.69292	0.0900971	0.92548	0.368116	0.0281694	3.48649	0.873866		556.11	1.85096	2.10692	549.01	17.1628	8.59768	556.865	5.38584	5.47991	563.095	6.97298	7.14413	30	23.932	3.70157	<11.2	490352	9386.56	<0.00938	20.6311	1.21411	1.32674	48.5309	1.66831	241.317		19.1246	4.35825	0.759501	1.43513
BB16	SE23A125.csv		557.784	1.77524	557.784	1.77524	11.0525	0.853407	0.0595473	2.10934	0.745504	2.63598	0.0904687	0.897053	0.375052	0.0287856	3.14084	0.874029		558.307	1.79411	2.05715	586.194	15.6151	7.82547	565.612	5.27196	5.36802	575.239	6.28168	6.47114	30	23.932	4.39258	<11.2	490419	9296.89	<0.00934	20.6414	1.23548	1.35013	48.7716	1.68216	239.854		17.6266	8.13515	0.759501	1.46338
BB16	SE23A132.csv		559.2	1.88666	559.2	1.88666	11.0308	0.874162	0.0591335	2.08231	0.742384	2.58371	0.0906581	0.955517	0.38708	0.0291823	3.41631	0.874112		559.426	1.91103	2.15989	571.044	15.8644	7.94982	563.796	5.16742	5.26539	583.054	6.83261	7.00719	30	23.932	3.91526	<11.5	490434	9273.3	<0.00954	20.9881	1.24739	1.40237	49.6038	1.70806	243.975		18.7935	18.791	0.759501	1.47728
BB16	SE23A105.csv		560.613	1.89907	560.613	1.89907	11.0038	0.88418	0.0588587	2.19469	0.738999	2.6346	0.0908623	0.960824	0.373686	0.0279167	3.38398	0.874201		560.633	1.92165	2.16928	560.901	17.0522	8.54248	561.821	5.26921	5.36532	558.114	6.76796	6.94417	30	23.932	2.29436	<11.8	490403	9317.37	<0.00887	21.1471	1.25126	1.31885	49.4954	1.72627	244.192		24.477	4.35825	0.759501	1.47709
BB16	SE23A121.csv		566.079	1.85859			10.8947	0.854117	0.0581575	2.0467	0.738871	2.54888	0.0917842	0.929297	0.385124	0.0280035	3.84442	0.874605		566.079	1.85859	2.11363	534.724	16.7551	8.39422	561.746	5.09775	5.19704	559.825	7.68884	7.84439	30	23.462	2.75678	<11.5	490348	9391.97	<0.00949	21.2323	1.24006	1.33294	49.4657	1.68735	242.229		22.5786	4.35825	0.759964	1.44495
FC-1	SE23A079.csv		1087.99	1.55826	1087.99	1.55826	5.43731	0.793279	0.0762306	1.10249	1.93867	1.95793	0.183963	0.802397	0.584056	0.0550551	1.52322	0.916128		1088.58	1.60479	1.89431	1100.24	4.0085	2.07292	1094.54	3.91587	4.04427	1086.32	3.04645	3.42009	30	23.076	32.873	<12.6	489610	9778.42	<0.00908	78.1577	5.98757	18.1656	343.075	3.20799	446.326		7.0438	4.35825	0.760284	1.48978
FC-1	SE23A130.csv		1090.93	1.62207			5.42204	0.798122	0.074847	1.12378	1.91075	1.9626	0.184394	0.811034	0.579037	0.0540429	1.67116	0.916328		1090.93	1.62207	1.90897	1063.5	4.25032	2.19004	1084.85	3.9252	4.0533	1066.87	3.34231	3.68608	30	23.932	16.8501	<11.4	488605	11295.7	<0.00953	67.4358	5.07297	13.2344	253.218	2.70493	385.071		9.31195	4.35825	0.759501	1.46576
FC-1	SE23A107.csv		1092.45	1.5879	1092.45	1.5879	5.4026	0.801222	0.0774523	1.13902	1.98016	1.92806	0.185014	0.817286	0.575344	0.0563075	1.60953	0.916614		1094.3	1.63457	1.9196	1131.97	4.00638	2.07189	1108.77	3.85612	3.98645	1110.37	3.21907	3.57471	30	23.932	16.9521	<12.5	488410	11489.6	<0.00945	73.5239	5.72272	15.1667	282.126	2.96432	417.306		9.52832	4.35825	0.759501	1.48071
FC-1	SE23A131.csv		1092.92	1.54545	1092.92	1.54545	5.41136	0.788517	0.0760619	1.07007	1.94621	1.92082	0.184791	0.796121	0.59322	0.0555483	1.54107	0.916511		1093.09	1.59224	1.88369	1095.81	3.90895	2.02483	1097.14	3.84163	3.97244	1095.8	3.08215	3.45192	30	23.932	22.1767	14.4229	489078	10661.6	<0.00949	62.8444	4.80511	13.7289	255.227	2.52112	358.037		8.18464	6.62996	0.759501	1.48672
FC-1	SE23A129.csv		1096.47	1.57529	1096.47	1.57529	5.39403	0.787331	0.0770159	1.29897	1.98273	2.02363	0.185623	0.808774	0.518338	0.054413	1.68757	0.916896		1097.62	1.61755	1.90513	1120.71	4.62256	2.37107	1109.65	4.04726	4.17162	1073.98	3.37513	3.71587	30	19.595	20.8636	110.915	488335	11414.8	<0.0104	72.0499	5.57726	14.6209	273.06	2.78375	399.73		9.33946	4.80318	0.764312	1.46311
FC-1	SE23A128.csv		1096.48	1.56736	1096.48	1.56736	5.39221	0.794652	0.0762311	1.04792	1.95697	1.89776	0.185452	0.80781	0.604231	0.0564991	1.64077	0.916816		1096.69	1.61562	1.90349	1100.25	3.81004	1.97714	1100.84	3.79551	3.92785	1114.05	3.28155	3.63108	30	23.932	17.6925	<11.1	488682	11171.4	<0.00925	68.9579	5.28379	14.522	266.4	2.78932	391.247		8.98182	4.35825	0.759501	1.46816
FC-1	SE23A085.csv		1110.59	1.64072			5.31849	0.79184	0.075186	1.15489	1.95253	1.96825	0.188011	0.820362	0.565487	0.0562023	1.67522	0.918001		1110.59	1.64072	1.92484	1072.58	4.3251	2.22634	1099.32	3.93649	4.06424	1108.35	3.35045	3.69346	30	23.932	25.0481	<12.3	489577	9998.41	<0.00882	65.1378	4.92297	14.3907	267.535	2.62259	364.811		7.80463	13.224	0.759501	1.46725
Mudtank	SE23A017.csv		676.015	4.19079	676.015	4.19079	9.00034	1.85104	0.0666361	6.48032	1.03557	6.50184	0.111183	2.09126	0.274655	0.0340977	6.57644	0.883155		679.612	4.18252	4.30192	825.489	32.7589	32.7631	721.711	13.0037	13.0429	679.634	13.1529	13.2444	30	23.932	5.18088	14.235	490311	9679.24	<0.00906	1.54641	0.103577	0.253353	7.68737	0.097518	14.8394		17.0649	6.82113	0.759501	1.47596
Mudtank	SE23A060.csv		686.572	4.05604	686.572	4.05604	8.80889	1.84566	0.0701951	6.30482	1.10168	6.3287	0.113464	2.01637	0.280947	0.0366773	6.45417	0.884167		692.833	4.03274	4.15645	933.15	27.7221	27.7272	754.163	12.6574	12.6977	730.134	12.9083	13.0016	30	23.932	7.09917	13.4494	490322	9661.85	<0.00925	1.62301	0.114513	0.276659	7.82021	0.101972	15.1598		14.3562	6.93869	0.759501	1.47836
Mudtank	SE23A071.csv		689.785	4.04705	689.785	4.04705	8.70476	1.85915	0.0764236	6.10624	1.21351	6.12847	0.114889	2.00236	0.291266	0.0410073	6.23918	0.8848		701.076	4.00472	4.12926	1105.3	22.0833	22.0897	806.805	12.2569	12.2986	814.622	12.4784	12.5748	30	23.932	6.63785	<12.9	490293	9725.79	<0.00925	1.61649	0.124176	0.300972	7.64543	0.104437	14.8754		14.7987	4.35825	0.759501	1.49083
Mudtank	SE23A063.csv		694.049	3.69082			8.80914	1.75168	0.061757	6.2901	0.971246	6.33541	0.113674	1.84541	0.268273	0.0360065	6.1005	0.884261		694.049	3.69082	3.8256	664.748	40.5282	40.5316	689.106	12.6708	12.7111	717.015	12.201	12.2996	30	23.932	4.49731	<13.4	490146	9920.88	<0.00949	1.88716	0.117157	0.318986	9.18841	0.136218	17.6071		18.1387	4.35825	0.759501	1.4922
Mudtank	SE23A077.csv		696.841	3.85565	696.841	3.85565	8.74097	1.75996	0.0656065	6.1421	1.03884	6.18727	0.114566	1.92392	0.275455	0.0373318	6.09026	0.884657		699.211	3.84783	3.97729	792.909	32.4934	32.4977	723.337	12.3745	12.4158	742.927	12.1805	12.2793	30	23.932	4.59417	<13.0	490160	9901.92	<0.00934	1.89051	0.12472	0.3236	9.05547	0.125111	17.4135		17.8665	4.35825	0.759501	1.45927
Mudtank	SE23A042.csv		712.927	4.403			8.55421	1.87314	0.0606613	6.85445	0.984288	6.87182	0.11694	2.2015	0.263608	0.0375806	6.49612	0.885713		712.927	4.403	4.51657	626.284	47.1767	47.1797	695.802	13.7436	13.7808	747.789	12.9922	13.0849	30	23.932	6.22361	<14.0	490271	9756.89	<0.00891	1.55656	0.0949271	0.270284	7.43064	0.103669	14.1663		15.4435	7.36717	0.759501	1.46003
Mudtank	SE23A014.csv		714.361	4.07862	714.361	4.07862	8.48634	1.80903	0.068195	6.22553	1.12515	6.2599	0.117907	2.03663	0.27904	0.0314275	6.85144	0.886143		718.502	4.07327	4.19578	873.563	29.5138	29.5185	765.44	12.5198	12.5606	627.225	13.7029	13.7908	30	23.932	5.89404	<14.5	490421	9555.81	<0.00967	1.70578	0.116929	0.241208	7.95311	0.118195	15.4277		16.3913	7.83647	0.759501	1.46524
Mudtank	SE23A064.csv		715.735	3.96518			8.51481	1.8187	0.0616213	6.56928	1.00057	6.59978	0.117427	1.98259	0.266813	0.0348361	6.58759	0.885929		715.735	3.96518	4.09093	660.036	42.6623	42.6656	704.101	13.1996	13.2382	694.103	13.1752	13.2665	30	23.932	8.36353	<13.6	490062	10026.6	<0.0096	1.75355	0.10861	0.27472	8.19258	0.117479	15.8158		13.4733	4.35825	0.759501	1.45874
Mudtank	SE23A055.csv		721.574	3.69571	721.574	3.69571	8.41878	1.7283	0.0655168	6.01176	1.07685	6.06587	0.118745	1.8434	0.276296	0.0393264	5.87779	0.886516		723.334	3.6868	3.82172	790.039	31.9341	31.9385	742.097	12.1317	12.1738	781.865	11.7556	11.8579	30	23.932	5.26576	<13.4	490411	9568.46	<0.00916	1.89461	0.124741	0.33518	8.83268	0.13996	16.9471		16.6262	7.02394	0.759501	1.48575
Mudtank	SE23A056.csv		724.694	4.03818			8.41333	1.79677	0.0576365	6.68106	0.949415	6.71603	0.118981	2.01909	0.259707	0.0346458	6.49458	0.886621		724.694	4.03818	4.16173	514.989	56.9807	56.9832	677.798	13.4321	13.4701	690.373	12.9892	13.0818	30	23.932	8.14348	<13.5	490317	9689.19	<0.00922	1.7382	0.10071	0.272557	8.16111	0.103599	15.515		13.4713	4.35825	0.759501	1.46832
OG-1	SE23A099.csv		3461.32	0.549577			1.38714	0.817672	0.298414	0.613666	29.7919	1.72947	0.721597	0.816418	0.799807	0.190731	1.51442	1.15431		3502.02	1.63284	1.91812	3461.32	0.549577	0.762896	3479.97	3.45893	3.60365	3538.46	3.02885	3.40442	30	21.984	9.95357	93.6742	490573	8764.99	<0.00862	104.009	31.1968	29.2888	159.589	1.03184	149.885		12.2855	4.80767	0.761482	1.47993
OG-1	SE23A097.csv	Reverse discordant	3466.4	0.589952			1.38346	0.823826	0.299394	0.659961	30.0222	1.74437	0.725243	0.814827	0.780453	0.193737	1.50093	1.15525		3515.66	1.62965	1.91542	3466.4	0.589952	0.792476	3487.54	3.48874	3.63227	3589.57	3.00186	3.38043	30	16.037	10.7509	99.2998	490563	8623.19	<0.0104	137.985	41.5358	41.0155	214.421	1.38936	192.985		14.1805	4.96512	0.769786	1.5365
OG-1	SE23A100.csv	REverse discordant	3466.95	0.683569			1.37559	0.820859	0.299499	0.764839	30.1266	1.76434	0.728128	0.824717	0.731631	0.190414	1.66265	1.15598		3526.43	1.64943	1.93227	3466.95	0.683569	0.864432	3490.95	3.52869	3.67066	3533.06	3.32531	3.67067	30	17.172	7.14427	61.7465	490523	9069.6	<0.00924	68.6626	20.7278	14.5784	80.4107	0.750583	99.8137		15.9608	5.16488	0.767918	1.53539
OG-1	SE23A096.csv	Reverse discordant	3467.43	0.506289			1.36344	0.792048	0.299593	0.566582	30.3362	1.70908	0.733566	0.804868	0.813329	0.193668	1.39162	1.15731		3546.68	1.60974	1.8985	3467.43	0.506289	0.732328	3497.77	3.41816	3.56453	3588.4	2.78324	3.18788	30	21.348	10.1225	85.5185	490556	8513.06	<0.00846	168.57	50.7505	50.0934	271.548	1.72991	242.729		12.1156	4.84376	0.762036	1.49839
Penglai	SE23A008.csv		3.76609	30.106	2.7936	41.6123	1689.88	14.9639	0.25008	33.6387	0.0204266	30.1261	0.000584388	15.053	0.406441	< DL	66.0545	0.83586		3.76609	30.106	30.1228	3184.57	33.4444	16.7306	20.5319	60.2522	60.2606	< DL	132.109	132.118	30	23.932	6.33507	<14.7	493150	5911.46	<0.0108	0.0192365	0.00481885	<0.0115	19.9356	0.274672	35.0384		16.1822	4.35825	0.759501	1.48548
Penglai	SE23A012.csv		4.05905	29.1277	2.92724	41.5594	1585.68	14.5633	0.266372	31.6819	0.0234859	28.196	0.00062986	14.5639	0.417659	< DL	70.1662	0.835879		4.05905	29.1277	29.1451	3284.09	30.3059	15.1622	23.5715	56.3921	56.4012	< DL	140.332	140.341	30	23.932	8.45697	27.6581	493335	5615.96	<0.00974	0.0196671	0.00526438	<0.0111	18.6525	0.248735	33.2676		13.6945	5.78659	0.759501	1.45874
Penglai	SE23A072.csv		4.09598	27.8847			1589.53	14.0159	< DL	37.6493	< DL	35.0282	0.000635593	13.9423		< DL	45.7572	0.835881		4.09598	27.8847	27.9028	< DL	#NUM!	#NUM!	< DL	70.0564	70.0637	< DL	91.5144	91.5276	30	23.932	5.79776	14.5983	493281	5710.75	<0.00925	0.0221079	<0.00479	<0.0122	20.0305	0.275706	36.7685		15.8191	6.74731	0.759501	1.44249
Penglai	SE23A073.csv		4.65482	24.948			1384.22	12.4754	< DL	58.102	< DL	56.7764	0.000722342	12.474		< DL	1.23147	0.835917		4.65482	24.948	24.9683	< DL	#NUM!	#NUM!	< DL	113.553	113.557	< DL	2.46294	2.91243	30	23.932	5.68742	<12.5	493288	5723	<0.00898	0.0271551	<0.00467	<0.0119	21.5118	0.312756	39.7183		15.8195	7.63352	0.759501	1.44458
Penglai	SE23A029.csv		4.86905	25.7251			1358.75	13.0339	< DL	0.387623	< DL	1.65803	0.000755599	12.8625		< DL	65.9497	0.83593		4.86905	25.7251	25.7448	< DL	#NUM!	#NUM!	< DL	3.31605	3.46674	< DL	131.899	131.909	30	23.932	3.89386	<13.9	493315	5697.03	<0.00861	0.0246238	<0.00458	<0.0113	19.3946	0.267394	34.772		19.3892	4.35825	0.759501	1.43773
Penglai	SE23A033.csv		4.89349	26.3511			1317.72	13.1753	< DL	0.387623	< DL	1.65803	0.000759394	13.1756		< DL	34.3841	0.835932		4.89349	26.3511	26.3704	< DL	#NUM!	#NUM!	< DL	3.31605	3.46674	< DL	68.7683	68.7858	30	23.932	4.94852	<14.1	493325	5683.82	<0.00873	0.0238814	<0.00466	<0.0114	18.9852	0.236855	33.5649		17.3176	14.357	0.759501	1.46137
Penglai	SE23A021.csv		5.61978	23.3448			1146.6	11.6724	< DL	0.387623	< DL	1.65803	0.000872151	11.6724		< DL	37.2195	0.835978		5.61978	23.3448	23.3665	< DL	#NUM!	#NUM!	< DL	3.31605	3.46674	< DL	74.439	74.4553	30	23.932	4.38199	<14.4	493259	5768.07	<0.00909	0.0308089	<0.00468	<0.0117	20.2515	0.273472	37.6748		18.7144	4.35825	0.759501	1.45725
Plesoivce_A1	AP30C035.csv		336.826	2.20962			18.6398	1.07103	0.0521931	2.6918	0.392261	3.94059	0.0536395	1.10481	0.369698	0.0154889	6.10565	0.858104		336.826	2.20962	2.42805	292.858	41.9709	20.9921	336.02	7.88118	7.94576	311.55	12.2113	12.3098	30	27.111	59.2065	<9.06	488143	11561.8	<0.0215	23.3046	1.22312	0.613645	41.3424	3.24403	457.141		5.17846	6.6033	0.564927	2.00223
Plesoivce_A1	AP30C036.csv		334.91	2.38529			18.7549	1.1092	0.0527065	2.35896	0.394368	3.79772	0.0533263	1.19265	0.425515	0.0168874	6.28493	0.85797		334.91	2.38529	2.58895	315.169	34.0415	17.029	337.555	7.59545	7.66244	339.447	12.5699	12.6656	30	24.314	53.6154	<9.8	488031	11754.7	<0.0234	22.5153	1.19286	0.655668	40.2768	3.18775	439.187		4.5179	2.81147	0.568079	1.99153
Plesoivce_A1	AP30C057.csv		336.92	2.1794			18.635	1.07059	0.0517973	2.66607	0.394564	3.91103	0.0536548	1.0897	0.372639	0.016443	6.02317	0.85811		336.92	2.1794	2.40059	275.451	44.3349	22.1738	337.698	7.82206	7.88712	330.587	12.0463	12.1462	30	27.111	62.2711	9.88571	488159	11478	<0.0216	24.1115	1.25569	0.66177	42.6917	3.46348	473.586		4.85612	4.9988	0.564927	2.00667
Plesoivce_A1	AP30C058.csv		336.806	2.20198			18.6442	1.07772	0.0520405	2.58576	0.39645	3.83549	0.0536361	1.10099	0.384712	0.0179059	5.98887	0.858102		336.806	2.20198	2.42111	286.17	41.3091	20.6613	339.07	7.67098	7.73732	359.739	11.9777	12.0782	30	26.893	59.746	<9.24	488188	11508.6	<0.0219	23.0682	1.20692	0.689633	40.8366	3.24985	453.434		4.83801	5.15778	0.565131	1.9999
Plesoivce_A1	AP30C102.csv		337.427	2.23903	337.427	2.23903	18.5783	1.06753	0.0543276	2.72701	0.418444	3.95264	0.0538128	1.12303	0.36453	0.0156154	6.08403	0.858178		337.886	2.24606	2.46126	383.652	31.9384	15.978	354.938	7.90528	7.96966	314.076	12.1681	12.2669	30	27.111	63.7098	15.9893	488159	11431.6	<0.0214	24.9033	1.35921	0.639944	44.4201	3.51368	489.602		4.72965	4.33564	0.564927	1.98238
Plesoivce_A1	AP30C103.csv		338.609	2.25533			18.5361	1.08448	0.0531838	2.39747	0.410464	3.78714	0.0539309	1.12767	0.412139	0.0179311	6.13895	0.858228		338.609	2.25533	2.46973	335.635	32.3693	16.1933	349.21	7.57428	7.64145	360.242	12.2779	12.3759	30	26.721	63.6131	11.434	488102	11624.4	<0.022	22.1273	1.18232	0.643158	38.8516	3.08172	433.535		4.7282	4.86379	0.565339	2.00428
Plesovice	SE23A007.csv		339.43	1.72843	339.43	1.72843	18.4842	0.827422	0.0536767	2.06265	0.407457	2.59617	0.0540937	0.867756	0.372306	0.015985	4.05493	0.858298		339.605	1.73551	2.00625	356.502	26.1221	13.0718	347.042	5.19234	5.28985	321.451	8.10986	8.25748	30	23.932	53.1273	<14.5	487831	12355.8	<0.0109	27.2288	1.4688	0.741091	48.3985	3.93456	536.152		6.03478	4.35825	0.759501	1.46095
Plesovice	SE23A009.csv		341.535	1.6764	341.535	1.6764	18.3361	0.79379	0.0550116	1.72956	0.420507	2.32745	0.0545252	0.843961	0.417122	0.0168224	3.411	0.858482		342.243	1.68792	1.96523	411.697	18.784	9.40689	356.414	4.6549	4.76342	338.151	6.82199	6.99684	30	23.932	83.9715	39.1179	488091	11711.3	<0.0101	35.6769	1.9726	1.04621	64.7879	5.11661	696.92		4.92447	5.39832	0.759501	1.47892
Plesovice	SE23A011.csv		344.768	1.68635			18.2227	0.815367	0.0521842	1.81995	0.402004	2.421	0.0549383	0.843177	0.408859	0.0170111	3.97452	0.858659		344.768	1.68635	1.96388	292.47	28.4165	14.2181	343.101	4.84201	4.94642	341.912	7.94905	8.0996	30	22.844	86.2097	62.3996	488357	11358.9	<0.00961	33.8768	1.77699	1.00005	60.8185	4.7436	653.172		4.89418	5.0473	0.760614	1.46085
Plesovice	SE23A015.csv		342.258	1.72534	342.258	1.72534	18.3402	0.811048	0.0542112	1.6431	0.413962	2.28063	0.0545882	0.870118	0.442622	0.0160954	3.67233	0.858509		342.628	1.74024	2.01034	378.829	19.5054	9.76703	351.725	4.56126	4.67196	323.654	7.34465	7.50733	30	21.943	85.3779	48.133	488279	11494.8	<0.00936	33.2285	1.81017	0.935298	60.1023	4.80926	647.975		4.96599	5.26878	0.761482	1.45378
Plesovice	SE23A053.csv		339.284	1.7449	339.284	1.7449	18.4882	0.838216	0.0547477	1.6366	0.410784	2.27233	0.054142	0.879924	0.455856	0.0171813	3.58957	0.858318		339.9	1.75985	2.02734	400.935	18.286	9.15829	349.439	4.54465	4.65574	345.305	7.17914	7.34549	30	21.658	72.7435	31.0335	488163	11695.4	<0.00905	33.6777	1.85291	1.00584	60.1861	4.6898	655.754		5.17814	5.70434	0.761848	1.44174
Plesovice	SE23A062.csv		334.998	1.68199	334.998	1.68199	18.7166	0.810889	0.0550965	1.75686	0.407942	2.37024	0.0534702	0.846278	0.419072	0.0176036	4.30012	0.858031		335.791	1.69256	1.96921	415.145	18.9106	9.4701	347.392	4.74047	4.84708	353.719	8.60024	8.73958	30	22.379	80.7828	47.1929	488006	11844.8	<0.00917	34.1038	1.88837	1.04873	61.4269	4.72093	670.869		4.90785	5.25056	0.760953	1.44177
QingHu	SE23A106.csv		157.839	1.73465			40.3824	0.837509	0.0491969	2.14746	0.168686	2.6541	0.024787	0.867326	0.363345	0.0077819	2.21929	0.845903		157.839	1.73465	2.00551	156.179	64.365	32.1869	158.278	5.30821	5.40363	157.128	4.43858	4.70289	30	22.921	11.6904	<12.2	488374	10855.2	<0.0092	24.539	1.21359	3.61421	484.471	7.26674	1033.73		11.3816	4.35825	0.760448	1.47297
QingHu	SE23A103.csv		158.571	1.78162			40.1581	0.840007	0.0491927	2.19659	0.169276	2.67217	0.0249034	0.890811	0.357188	0.00778926	2.35682	0.845952		158.571	1.78162	2.04627	155.98	65.9238	32.9661	158.791	5.34433	5.43911	157.276	4.71363	4.96331	30	23.932	11.2499	<12.2	488543	10622.2	<0.00901	25.1538	1.24392	3.48136	468.184	7.40532	1060.15		11.3844	4.35825	0.759501	1.48674
QingHu	SE23A109.csv		159.47	1.87856	159.47	1.87856	39.9106	0.848507	0.0492854	2.17754	0.170612	2.66808	0.0250476	0.937361	0.363072	0.0084853	2.59347	0.846013		159.478	1.87472	2.12782	160.387	63.505	31.7569	159.95	5.33616	5.43109	171.27	5.18695	5.41485	30	23.932	9.232	17.9334	489040	10242.9	<0.00863	20.1451	0.997955	2.9002	357.965	5.99979	844.012		12.1278	6.18315	0.759501	1.45906
QingHu	SE23A111.csv		160.465	1.8354			39.6853	0.898813	0.0482013	2.80737	0.168128	3.19771	0.0252046	0.9177	0.304916	0.00781975	2.59818	0.846078		160.465	1.8354	2.09326	108.106	122.648	61.3264	157.793	6.39541	6.47483	157.889	5.19635	5.42385	30	22.544	16.294	12.6256	489266	10092.6	<0.00928	15.8188	0.766269	2.9019	385.875	4.58214	653.667		9.72135	7.01598	0.760782	1.46678
QingHu	SE23A098.csv		160.79	1.80958			39.6075	0.839114	0.0482879	2.06503	0.168499	2.5864	0.0252563	0.904792	0.376452	0.00802756	2.58733	0.8461		160.79	1.80958	2.07066	112.344	86.7454	43.3759	158.115	5.1728	5.27067	162.068	5.17466	5.40308	30	23.932	9.4387	23.293	489544	9418.08	<0.00844	21.9878	1.06736	3.40051	443.474	6.49258	914.542		12.1258	5.85183	0.759501	1.468
QingHu	SE23A104.csv		161.403	1.78469			39.4421	0.844228	0.048866	2.18626	0.171197	2.66917	0.0253537	0.892346	0.360227	0.0081645	2.48896	0.846141		161.403	1.78469	2.04895	140.357	73.1283	36.568	160.458	5.33833	5.43322	164.821	4.97792	5.21496	30	23.932	7.68958	<11.8	488874	10220.5	<0.00878	25.1661	1.23611	3.53164	453.361	7.3722	1042.15		13.4836	4.35825	0.759501	1.44611
QingHu	SE23A108.csv	avoided common Pb	161.941	1.9463			39.3646	0.87371	0.0492811	2.43498	0.173175	2.89544	0.0254394	0.973152	0.337733	0.00839528	2.99136	0.846177		161.941	1.9463	2.19115	160.18	71.1072	35.5575	162.171	5.79088	5.87846	169.461	5.98271	6.18134	30	17.049	6.7794	26.2427	488113	11394.9	<0.00923	22.6026	1.11995	2.44385	311.803	6.72933	960.738		16.1611	6.03881	0.767918	1.52471
Temora	AP30C160.csv		421.052	2.95446			14.8221	1.33436	0.0526147	4.02766	0.487902	4.90715	0.0674962	1.47723	0.314488	0.0194451	5.3365	0.86405		421.052	2.95446	3.1212	311.203	58.9042	58.9066	403.48	9.8143	9.86624	390.366	10.673	10.7856	30	27.111	12.1506	<8.13	490374	7568.92	<0.0218	6.88023	0.363635	1.06537	58.1279	0.778714	107.963		7.52227	2.81147	0.564927	2.01143
Temora	AP30C161.csv		411.88	2.97377			15.1826	1.35932	0.0533201	4.15482	0.482704	5.00607	0.0659784	1.48688	0.310949	0.0201449	5.29408	0.863396		411.88	2.97377	3.13948	341.432	55.0871	55.0897	399.926	10.0121	10.063	404.277	10.5882	10.7016	30	27.111	12.7471	<8.03	490398	7429.45	<0.0215	6.30564	0.337726	1.08986	57.3677	0.71269	101.302		7.33876	2.81147	0.564927	2.00781
Temora	AP30C162.csv		414.901	2.94657	414.901	2.94657	15.0268	1.33269	0.0562082	3.89695	0.513012	4.80065	0.066572	1.47788	0.323585	0.0197845	5.80018	0.863651		415.468	2.95577	3.12244	459.614	37.5963	37.6	420.472	9.60129	9.65437	397.113	11.6004	11.704	30	27.111	10.2937	<8.19	490591	8030.44	<0.0219	6.96263	0.39309	0.775847	41.5384	0.744689	110.75		8.09926	2.81147	0.564927	2.00396
Temora	AP30C163.csv		416.589	2.93058			14.9811	1.399	0.0542457	4.35227	0.496047	5.16212	0.0667573	1.46529	0.30602	0.01926	5.50059	0.863731		416.589	2.93058	3.09861	380.259	51.4589	51.4616	409.023	10.3242	10.3736	386.686	11.0012	11.1105	30	27.111	13.2219	<8.06	490371	7544.79	<0.0216	5.67901	0.309532	0.93381	51.3216	0.666501	90.1212		7.24683	7.05558	0.564927	1.99004
Temora	AP30C164.csv		427.086	3.08618			14.5943	1.45765	0.0545268	4.66872	0.511068	5.41875	0.0684959	1.54309	0.298028	0.019605	5.85562	0.864481		427.086	3.08618	3.24616	391.871	53.4555	53.4581	419.167	10.8375	10.8846	393.545	11.7112	11.814	30	26.359	10.5256	<8.05	490560	7800.37	<0.0215	4.99696	0.273696	0.751281	40.4645	0.562703	77.0738		8.03737	8.31313	0.565763	2.0025
Temora	SE23A005.csv		425.777	2.21707	425.777	2.21707	14.6373	0.970804	0.0562299	3.18509	0.539987	3.48749	0.0683544	1.10915	0.291554	0.0219295	3.62892	0.86442		426.232	2.2183	2.43596	460.467	30.6672	30.6717	438.416	6.97498	7.04787	439.704	7.25783	7.42242	30	23.932	10.0369	<13.5	490937	8680.61	<0.0108	9.88984	0.559232	1.24103	59.0996	1.1483	153.753		12.633	7.25614	0.759501	1.44444
Temora	SE23A025.csv		416.159	2.40673	416.159	2.40673	14.9484	1.07998	0.0576468	3.43007	0.537424	3.68739	0.0668969	1.20259	0.300321	0.0217044	4.05321	0.863791		417.432	2.40518	2.60728	515.385	29.2296	29.2344	436.725	7.37479	7.44376	435.239	8.10643	8.25411	30	23.932	15.0845	18.2316	491602	7815.09	<0.00884	6.61171	0.383134	1.03107	49.0476	0.75987	105.384		10.1952	6.39868	0.759501	1.43915
Temora	SE23A047.csv		424.796	2.07456	424.796	2.07456	14.6875	0.979286	0.0554312	2.87701	0.523641	3.27797	0.0681263	1.0398	0.322228	0.0227532	3.65664	0.864321		424.856	2.0796	2.31037	428.662	29.9207	29.9254	427.581	6.55595	6.63344	456.036	7.31329	7.47665	30	23.385	7.96846	15.5772	490953	8652.35	<0.00896	9.86336	0.54953	0.923787	41.8838	1.07427	153.709		13.7013	6.68789	0.759964	1.44208
Temora	SE23A069.csv		417.065	2.05126	417.065	2.05126	14.9255	0.949721	0.0580011	2.48675	0.538063	2.91108	0.0670749	1.03068	0.356779	0.0170123	3.84147	0.863868		418.507	2.06136	2.29396	528.826	20.6051	20.6119	437.147	5.82216	5.90928	341.937	7.68293	7.83859	30	23.617	5.6061	22.4	490697	8906.71	<0.0091	12.7532	0.743455	1.23462	75.4871	1.40287	200.984		16.007	6.01471	0.759807	1.45916
Temora	SE23A092.csv		407.494	2.62148	407.494	2.62148	15.2493	1.10739	0.0588319	4.22594	0.532872	4.42025	0.0655734	1.30015	0.253488	0.0227543	4.08994	0.863221		409.43	2.6003	2.7883	559.909	32.8982	32.9024	433.714	8.84049	8.89811	456.058	8.17987	8.32625	30	23.932	12.304	37.6444	491132	8415.08	<0.00882	6.3121	0.373213	1.03108	47.4185	0.745122	101.28		10.883	5.37215	0.759501	1.46928
Temora	SE23A115.csv		410.337	2.36482	410.337	2.36482	15.1956	1.08872	0.056096	3.49697	0.510529	3.77217	0.0658162	1.18095	0.29726	0.0200671	3.90554	0.863326		410.899	2.36189	2.56741	455.178	34.0924	34.0965	418.805	7.54435	7.61179	402.731	7.81109	7.96424	30	23.932	12.6945	<11.4	491343	8187.23	<0.0091	6.66699	0.375905	1.08495	56.4974	0.74733	106.374		10.5539	7.53809	0.759501	1.47402
Temora	SE23A140.csv		419.175	2.37318			14.8912	1.0559	0.052712	3.41012	0.490903	3.70034	0.0671854	1.18659	0.295783	0.020655	4.28793	0.863916		419.175	2.37318	2.5778	315.403	49.1718	49.1746	405.525	7.40069	7.46942	414.408	8.57587	8.7156	30	23.932	10.812	<10.9	491597	7866.39	<0.00951	7.40563	0.392509	0.652397	32.2679	0.83204	116.456		11.1937	9.3648	0.759501	1.46242
Calibraiton standard for Pb isotopes & TE:
NIST610	SE23A001.csv						4.2126	0.95013	0.90685	0.36724	91.8902	1.76839	0.237182	0.96443	0.932751	0.516604	1.38645	0.941042														30	23.932	469.814	484.726	448	439.32	5.93934	103.888	94.7037	227.557	461.659	1.08347	464.737		2.1948	4.26404	6e-15	1.12387
NIST610	SE23A002.csv						4.23994	0.932246	0.911061	0.36724	91.6481	1.78434	0.235708	0.946388	0.930411	0.512215	1.39976	0.940344														30	23.932	437.266	435.635	448	428.305	5.86238	100.138	91.6375	219.045	448.642	1.06967	452.476		2.1948	4.26404	6e-15	1.12387
NIST610	SE23A022.csv						4.2417	0.933056	0.914974	0.36724	91.236	1.77398	0.235599	0.944671	0.93052	0.505433	1.36005	0.940293														30	23.932	443.588	443.5	448	440.894	6.13546	103.846	95.4919	228.327	467.807	1.14397	470.045		2.1948	4.26404	6e-15	1.12387
NIST610	SE23A044.csv						4.18899	0.923296	0.907827	0.36724	91.1266	1.76865	0.238557	0.931174	0.929196	0.509738	1.36882	0.941694														30	23.932	452.439	458.12	448	430.466	5.89937	101.184	92.2514	221.017	449.435	1.03902	452.507		2.1948	4.26404	6e-15	1.12387
NIST610	SE23A066.csv						4.23737	0.903847	0.905185	0.36724	89.636	1.76789	0.236022	0.924257	0.926448	0.510143	1.36575	0.940493														30	23.932	462.336	483.066	448	434.033	5.78731	102.266	93.0524	223.367	454.269	1.10239	458.646		2.1948	4.26404	6e-15	1.12387
NIST610	SE23A089.csv						4.30405	0.912824	0.913705	0.36724	88.903	1.76923	0.23218	0.916492	0.927735	0.511309	1.38843	0.938675														30	23.932	450.121	443.179	448	438.189	5.98475	102.934	94.5168	226.669	463.605	1.06446	466.553		2.1948	4.26404	6e-15	1.12387
NIST610	SE23A112.csv						4.26535	0.919157	0.90997	0.36724	89.4185	1.76631	0.234285	0.938259	0.928624	0.513234	1.37741	0.939671														30	23.932	446.666	454.591	448	434.001	6.03482	102.12	93.3705	223.038	455.117	1.11337	457.853		2.1948	4.26404	6e-15	1.12387
NIST610	SE23A143.csv						4.2274	0.927369	0.907179	0.36724	90.1939	1.75133	0.236371	0.945865	0.929753	0.500856	1.41066	0.940658														30	23.932	448.355	479.103	448	429.406	5.76367	101.792	92.775	223.699	454.573	1.09086	456.512		2.1948	4.26404	6e-15	1.12387
NIST610	SE23A144.csv						4.25694	0.907292	0.912025	0.36724	90.093	1.76992	0.234806	0.921268	0.926946	0.497695	1.33875	0.939917														30	23.932	457.465	440.07	448	440.387	6.08188	102.865	94.2835	224.682	459.698	1.07596	464.315		2.1948	4.26404	6e-15	1.12387
NIST610	AP30C001.csv						4.25453	1.04599	0.911781	0.2177	89.7809	2.98093	0.234939	1.04764	0.97902	0.504463	3.92178	0.939981														30	27.111	438.12	455.542	448	423.252	5.77062	99.5404	91.1672	217.485	442.586	1.07465	444.544		3.00476	2.74566	1.9e-14	1.83299
NIST610	AP30C002.csv						4.29297	1.09077	0.908755	0.2177	88.7301	2.99442	0.232959	1.10185	0.980659	0.504516	3.92369	0.939044														30	27.111	447.109	452.991	448	433.905	5.91137	102.37	93.486	224.873	457.704	1.05047	462.276		3.00476	2.74566	1.9e-14	1.83299
NIST610	AP30C024.csv						4.27946	1.07168	0.907811	0.2177	89.5443	2.9899	0.233527	1.07598	0.979985	0.507534	3.92	0.939312														30	27.111	483.328	475.509	448	452.048	6.28947	106.724	97.3911	233.524	476.609	1.15223	480.489		3.00476	2.74566	1.9e-14	1.83299
NIST610	AP30C043.csv						4.29471	1.07526	0.909215	0.2177	90.4165	2.99612	0.232741	1.07635	0.980114	0.511763	3.92405	0.938941														30	27.111	459.343	462.741	448	440.568	5.88652	102.974	94.1188	225.763	463.074	1.12782	466.14		3.00476	2.74566	1.9e-14	1.83299
NIST610	AP30C063.csv						4.27617	1.0677	0.912221	0.2177	92.1348	2.9834	0.233794	1.07352	0.97984	0.518127	3.91734	0.939439														30	27.111	437.307	446.738	448	429.819	5.96309	100.422	92.0502	219.94	452.156	1.05926	453.27		3.00476	2.74566	1.9e-14	1.83299
NIST610	AP30C081.csv						4.2578	1.07087	0.91233	0.2177	93.1132	2.9817	0.234844	1.08382	0.979955	0.531426	3.92441	0.939935														30	27.111	446.691	428.947	448	441.567	5.97643	103.834	95.1814	228.332	462.657	1.04113	466.788		3.00476	2.74566	1.9e-14	1.83299
NIST610	AP30C101.csv						4.21671	1.10209	0.907701	0.2177	93.4765	2.9985	0.237081	1.11766	0.981043	0.530028	3.93049	0.940995														30	27.111	441.706	474.285	448	427.513	5.76474	100.76	91.9004	219.002	447.876	1.12146	449.655		3.00476	2.74566	1.9e-14	1.83299
NIST610	AP30C121.csv						4.23774	1.07597	0.907741	0.2177	92.2522	2.99198	0.235943	1.08082	0.980139	0.53238	3.92372	0.940456														30	27.111	474.301	474.833	448	429.388	6.06565	101.792	92.8075	222.218	452.068	1.06852	457.02		3.00476	2.74566	1.9e-14	1.83299
NIST610	AP30C139.csv						4.2358	1.06753	0.90988	0.2177	91.3199	2.99067	0.236085	1.06854	0.979833	0.532543	3.92	0.940523														30	27.111	433.336	459.073	448	429.426	5.77621	101.597	92.883	223.792	452.181	1.05498	456.088		3.00476	2.74566	1.9e-14	1.83299
NIST610	AP30C159.csv						4.27279	1.08094	0.910359	0.2177	88.9749	2.99237	0.234225	1.08067	0.980316	0.52302	3.92148	0.939643														30	27.111	453.215	446.139	448	438.625	5.88725	102.107	93.3997	225.101	457.104	1.09462	462.678		3.00476	2.74566	1.9e-14	1.83299
NIST610	AP30C179.csv						4.25045	1.08537	0.911338	0.2177	87.782	2.99311	0.235287	1.08674	0.980472	0.508368	3.92402	0.940145														30	27.111	451.898	465.94	448	431.832	5.96924	102.611	93.9679	224.206	460.627	1.12944	461.527		3.00476	2.74566	1.9e-14	1.83299
NIST610	AP30C200.csv						4.25026	1.08606	0.911223	0.2177	86.5549	3.00104	0.235437	1.09393	0.980496	0.500681	3.9237	0.940216														30	27.111	447.027	453.355	448	431.647	5.99607	101.475	92.9154	221.957	454.673	1.0499	456.94		3.00476	2.74566	1.9e-14	1.83299
NIST610	AP30C220.csv						4.20948	1.08261	0.905659	0.2177	86.6526	2.99791	0.237667	1.08932	0.980375	0.495108	3.91622	0.941272														30	27.111	467.424	463.939	448	449.369	6.11441	105.62	96.1865	229.575	469.409	1.08934	470.7		3.00476	2.74566	1.9e-14	1.83299
NIST610	AP30C235.csv						4.29351	1.0964	0.912293	0.2177	86.4975	2.99504	0.233029	1.10487	0.980852	0.494544	3.92189	0.939077														30	27.111	455.444	446.778	448	439.874	5.91387	102.15	93.651	225.331	459.131	1.13128	464.82		3.00476	2.74566	1.9e-14	1.83299
NIST610	AP30C260.csv						4.25185	1.06771	0.910316	0.2177	92.0489	2.99132	0.235118	1.06958	0.97984	0.496744	3.92449	0.940065														30	27.111	450.002	467.347	448	430.005	5.87668	101.336	92.684	221.452	454.281	1.04805	458.122		3.00476	2.74566	1.9e-14	1.83299
NIST610	AP30C261.csv						4.20912	1.12396	0.909201	0.2177	93.2169	2.99343	0.237579	1.13517	0.981754	0.504239	3.92828	0.94123														30	27.111	445.738	453.833	448	431.177	5.92984	102.081	93.2466	223.943	453.088	1.0992	455.443		3.00476	2.74566	1.9e-14	1.83299
Weighted Averages:
91500																							1050.66	Wtd Mean (from internal errs)
																							26.8515	2-sigma err. of mean
																							1.57894	MSWD
																							0	rejected
																							0.0517998	Probability of fit
AusZ-2			38.8527	Wtd Mean (from internal errs)																			179.313	Wtd Mean (from internal errs)
			0.739816	2-sigma err. of mean																			164.262	2-sigma err. of mean
			0.463689	MSWD																			0.365205	MSWD
			0	rejected																			0	rejected
			0.803554	Probability of fit																			0.872656	Probability of fit
BB16zircon			559.867	Wtd Mean (from internal errs)																			560.313	Wtd Mean (from internal errs)
			4.6385	2-sigma err. of mean																			41.249	2-sigma err. of mean
			0.534964	MSWD																			0.189983	MSWD
			0	rejected																			0	rejected
			0.710054	Probability of fit																			0.943737	Probability of fit
FC-1			1095.16	Wtd Mean (from internal errs)																			1097.28	Wtd Mean (from internal errs)
			6.55819	2-sigma err. of mean																			17.0471	2-sigma err. of mean
			0.670639	MSWD																			1.09496	MSWD
			0	rejected																			0	rejected
			0.673451	Probability of fit																			0.362472	Probability of fit
Mudtank			702.747	Wtd Mean (from internal errs)																			795.575	Wtd Mean (from internal errs)
			8.86096	2-sigma err. of mean																			84.311	2-sigma err. of mean
			1.39613	MSWD																			1.64771	MSWD
			0	rejected																			0	rejected
			0.183288	Probability of fit																			0.095731	Probability of fit
OG-1			3465.45	Wtd Mean (from internal errs)																			3465.45	Wtd Mean (from internal errs)
			9.91122	2-sigma err. of mean																			9.91122	2-sigma err. of mean
			0.0879931	MSWD																			0.0879931	MSWD
			0	rejected																			0	rejected
			0.966654	Probability of fit																			0.966654	Probability of fit
Penglai			4.50855	Wtd Mean (from internal errs)
			0.455434	2-sigma err. of mean
			1.07272	MSWD
			0	rejected
			0.376128	Probability of fit
Plesovice			339.07	Wtd Mean (from internal errs)																			359.07	Wtd Mean (from internal errs)
			1.87989	2-sigma err. of mean																			26.7095	2-sigma err. of mean
			0.929586	MSWD																			1.23902	MSWD
			0	rejected																			0	rejected
			0.51023	Probability of fit																			0.254194	Probability of fit
QingHu			159.982	Wtd Mean (from internal errs)																			143.11	Wtd Mean (from internal errs)
			1.10116	2-sigma err. of mean																			40.0286	2-sigma err. of mean
			1.08333	MSWD																			0.169256	MSWD
			0	rejected																			0	rejected
			0.369568	Probability of fit																			0.985016	Probability of fit
Temora			417.846	Wtd Mean (from internal errs)																			443.057	Wtd Mean (from internal errs)
			3.02196	2-sigma err. of mean																			45.0733	2-sigma err. of mean
			1.37605	MSWD																			1.07094	MSWD
			0	rejected																			0	rejected
			0.176331	Probability of fit																			0.380376	Probability of fit
[truncated: 34 more columns]
