# Supplementary material for: Time-of-flight ICP-MS laser ablation zircon geochronology: assessment and comparison against quadrupole ICP-MS
Source: Royal Society of Chemistry journal article supplement (doi:10.1039/d0ja00252f), 2020-01-01
Supplement: d0ja00252f2.pdf [file d0ja00252f2.pdf]

|                                                                                         |                                                                                                                                                                                                                                                                                                                                                                                                                                                                                                                                                                                                                                                                                                                                                                                                                                                                                                                                                 |
|-----------------------------------------------------------------------------------------|-------------------------------------------------------------------------------------------------------------------------------------------------------------------------------------------------------------------------------------------------------------------------------------------------------------------------------------------------------------------------------------------------------------------------------------------------------------------------------------------------------------------------------------------------------------------------------------------------------------------------------------------------------------------------------------------------------------------------------------------------------------------------------------------------------------------------------------------------------------------------------------------------------------------------------------------------|
| <b>Laboratory &amp; Sample Preparation</b>                                              |                                                                                                                                                                                                                                                                                                                                                                                                                                                                                                                                                                                                                                                                                                                                                                                                                                                                                                                                                 |
| Laboratory name                                                                         | CODES Analytical Laboratories, University of Tasmania – Australia                                                                                                                                                                                                                                                                                                                                                                                                                                                                                                                                                                                                                                                                                                                                                                                                                                                                               |
| Sample type/mineral                                                                     | Zircon                                                                                                                                                                                                                                                                                                                                                                                                                                                                                                                                                                                                                                                                                                                                                                                                                                                                                                                                          |
| Sample preparation                                                                      | Conventional mineral separation, 1 inch resin mount, 0.3um alumina polish. Cleaned in DI H <sub>2</sub> O degassed in vacuum.                                                                                                                                                                                                                                                                                                                                                                                                                                                                                                                                                                                                                                                                                                                                                                                                                   |
| <b>Laser ablation system</b>                                                            |                                                                                                                                                                                                                                                                                                                                                                                                                                                                                                                                                                                                                                                                                                                                                                                                                                                                                                                                                 |
| Make, Model & type                                                                      | ASI Resolution S155-SE                                                                                                                                                                                                                                                                                                                                                                                                                                                                                                                                                                                                                                                                                                                                                                                                                                                                                                                          |
| Ablation cell & volume                                                                  | Two volume laser cell with an 8.8 cm <sup>3</sup> small 2 <sup>nd</sup> volume fixed cup.                                                                                                                                                                                                                                                                                                                                                                                                                                                                                                                                                                                                                                                                                                                                                                                                                                                       |
| Laser wavelength (nm)                                                                   | 193nm                                                                                                                                                                                                                                                                                                                                                                                                                                                                                                                                                                                                                                                                                                                                                                                                                                                                                                                                           |
| Pulse width (ns)                                                                        | 5ns                                                                                                                                                                                                                                                                                                                                                                                                                                                                                                                                                                                                                                                                                                                                                                                                                                                                                                                                             |
| Fluence (J.cm <sup>-2</sup> )                                                           | 2.0 J/cm <sup>2</sup> .                                                                                                                                                                                                                                                                                                                                                                                                                                                                                                                                                                                                                                                                                                                                                                                                                                                                                                                         |
| Repetition rate (Hz)                                                                    | 5Hz                                                                                                                                                                                                                                                                                                                                                                                                                                                                                                                                                                                                                                                                                                                                                                                                                                                                                                                                             |
| Ablation duration (secs)                                                                | 30secs                                                                                                                                                                                                                                                                                                                                                                                                                                                                                                                                                                                                                                                                                                                                                                                                                                                                                                                                          |
| Ablation pit depth / ablation rate                                                      | ~9µm pit depth measured by optical interferometry, equivalent to ~60 nm/pulse                                                                                                                                                                                                                                                                                                                                                                                                                                                                                                                                                                                                                                                                                                                                                                                                                                                                   |
| Spot size (um)                                                                          | 30µm                                                                                                                                                                                                                                                                                                                                                                                                                                                                                                                                                                                                                                                                                                                                                                                                                                                                                                                                            |
| Sampling mode / pattern                                                                 | Static spot ablation                                                                                                                                                                                                                                                                                                                                                                                                                                                                                                                                                                                                                                                                                                                                                                                                                                                                                                                            |
| Carrier gas                                                                             | 100% He in the cell set to 0.35 l/min, Ar carrier gas combined in 2 <sup>nd</sup> volume of laser cell and was set to 1.05 l/min.                                                                                                                                                                                                                                                                                                                                                                                                                                                                                                                                                                                                                                                                                                                                                                                                               |
| <b>ICP-MS Instrument</b>                                                                |                                                                                                                                                                                                                                                                                                                                                                                                                                                                                                                                                                                                                                                                                                                                                                                                                                                                                                                                                 |
| Make, Model & type                                                                      | Agilent 7900 ICP-MS and a TOFWERK icpTOF R                                                                                                                                                                                                                                                                                                                                                                                                                                                                                                                                                                                                                                                                                                                                                                                                                                                                                                      |
| Sample introduction                                                                     | Sample mixing done via 'squid' and Nylon tubing                                                                                                                                                                                                                                                                                                                                                                                                                                                                                                                                                                                                                                                                                                                                                                                                                                                                                                 |
| RF power (W)                                                                            | 1350W for both ICP-MS                                                                                                                                                                                                                                                                                                                                                                                                                                                                                                                                                                                                                                                                                                                                                                                                                                                                                                                           |
| Make-up gas flow (l/min)                                                                | 0.8 for both instruments                                                                                                                                                                                                                                                                                                                                                                                                                                                                                                                                                                                                                                                                                                                                                                                                                                                                                                                        |
| Detection system                                                                        | Electron multiplier with Pb and U in pulse counting mode for the quadrupole and a Micro-Channel-Plate detector for the TOF                                                                                                                                                                                                                                                                                                                                                                                                                                                                                                                                                                                                                                                                                                                                                                                                                      |
| Masses measured                                                                         | Quadrupole: Experiment 1: <sup>31</sup> P, <sup>49</sup> Ti, <sup>56</sup> Fe, <sup>89</sup> Y, <sup>91</sup> Zr, <sup>93</sup> Nb, <sup>139</sup> La, <sup>140</sup> Ce, <sup>141</sup> Pr, <sup>146</sup> Nd, <sup>147</sup> Sm, <sup>153</sup> Eu, <sup>157</sup> Gd, <sup>159</sup> Tb, <sup>163</sup> Dy, <sup>165</sup> Ho, <sup>166</sup> Er, <sup>169</sup> Tm, <sup>172</sup> Yb, <sup>175</sup> Lu, <sup>178</sup> Hf, <sup>181</sup> Ta, <sup>202</sup> Hg, <sup>204</sup> Pb, <sup>206</sup> Pb, <sup>207</sup> Pb, <sup>208</sup> Pb, <sup>232</sup> Th, <sup>235</sup> U and <sup>238</sup> U<br>Quadrupole Experiment 2: <sup>49</sup> Ti, <sup>56</sup> Fe, <sup>91</sup> Zr, <sup>178</sup> Hf, <sup>202</sup> Hg, <sup>204</sup> Pb, <sup>206</sup> Pb, <sup>207</sup> Pb, <sup>208</sup> Pb, <sup>232</sup> Th, <sup>235</sup> U, & <sup>238</sup> U<br>TOF Experiments 1 & 2: All masses collected during data acquisition. |
| Integration time per peak/dwell times (ms); quadrupole settling time between mass jumps | Quadrupole ICP-MS:<br>10ms dwell for <sup>49</sup> Ti, <sup>202</sup> Hg, <sup>208</sup> Pb, <sup>232</sup> Th & <sup>235</sup> U<br>15ms dwell for <sup>204</sup> Pb & <sup>238</sup> U<br>25ms dwell for <sup>206</sup> Pb & <sup>207</sup> Pb.<br>2ms dwell time for all others<br>TOFMS<br>278ms integration time.                                                                                                                                                                                                                                                                                                                                                                                                                                                                                                                                                                                                                          |
| Total integration time per output                                                       | Quadrupole ICP-MS:<br>255ms for Experiment 1<br>188ms for Experiment 2<br>TOFMS:<br>278ms for both Experiments                                                                                                                                                                                                                                                                                                                                                                                                                                                                                                                                                                                                                                                                                                                                                                                                                                  |
| 'Sensitivity' as useful yield cps/ ppm                                                  | 2,000 cps / ppm on <sup>238</sup> U in 91500 zircon assuming 80 ppm U                                                                                                                                                                                                                                                                                                                                                                                                                                                                                                                                                                                                                                                                                                                                                                                                                                                                           |
| EM Dead time (ns)                                                                       | 37 for quadrupole ICP-MS                                                                                                                                                                                                                                                                                                                                                                                                                                                                                                                                                                                                                                                                                                                                                                                                                                                                                                                        |
| <b>Data Processing</b>                                                                  |                                                                                                                                                                                                                                                                                                                                                                                                                                                                                                                                                                                                                                                                                                                                                                                                                                                                                                                                                 |
| Gas blank                                                                               | 30 seconds                                                                                                                                                                                                                                                                                                                                                                                                                                                                                                                                                                                                                                                                                                                                                                                                                                                                                                                                      |
| Calibration strategy                                                                    | 91500 used as primary reference material for U-Pb and Th-Pb ratios. NIST610 used for Pb isotope ratios ( <sup>207</sup> Pb/ <sup>206</sup> Pb) and trace element concentrations, corrected to BCR-2g as a secondary standard..                                                                                                                                                                                                                                                                                                                                                                                                                                                                                                                                                                                                                                                                                                                  |
| Reference Material info                                                                 | 91500 (Horstwood et al., 2016)                                                                                                                                                                                                                                                                                                                                                                                                                                                                                                                                                                                                                                                                                                                                                                                                                                                                                                                  |

|                                                    |                                                                                                                                                                                                           |
|----------------------------------------------------|-----------------------------------------------------------------------------------------------------------------------------------------------------------------------------------------------------------|
|                                                    | NIST610 (Baker et al., 2004; Jochum et al., 2011)                                                                                                                                                         |
| Data processing package used / Correction for LIEF | LADR –3 <sup>rd</sup> order polynomial correction for LIEF..                                                                                                                                              |
| Mass discrimination                                | Corrected using standard / sample bracketing                                                                                                                                                              |
| Common-Pb correction, composition and uncertainty  | <sup>207</sup> Pb Common Pb correction applied to some analyses in Mudtank, Penglai, and Qing Hu zircons using Stacey-Kramer's model Pb at age of zircon and 0.01 error (absolute) common Pb composition. |
| Uncertainty level & propagation                    | Ages are quoted at 2 sigma absolute, propagation is by quadratic addition of signal error of unknowns and standards, error in drift corrections, etc. as described by Horstwood et al. (2016).            |
